# Supplementary material for: Managing agricultural ammonia emission for multi-benefits in China
Source: Research Square preprint supplement (doi:10.21203/rs.3.rs-3118201/v1), 2023-09-14
Supplement: Supplementary file 1 [file 1972da08dafb3b1a795cd72e.xlsx]

## Sheet: large scale-farming
Large-scale farming animal NH3 EFs by stage under current and abated scenario
			Four Stage	Indoor/Housing	Storage	Application	Outdoor/Grazing	Four Stage	Indoor/Housing	Storage	Application	Outdoor/Grazing
region	animal type	manure treatment mode	total NH3 EF_current	EF_1_current	EF_2_current	EF_3_current	EF_4_current	total NH3 EF _abated scenario	EF_1_abated scenario	EF_2_abated scenario	EF_3_abated scenario	EF_4_abated scenario
Anhui
	beef cattle
		bedding / litter	15.2634	3.53468	3.02071	7.97919	0.728799	8.17036	3.18121	1.23424	3.09899	0.655919
		Blistering feces	15.3815	3.53468	3.05315	8.0649	0.728799	9.21248	3.18121	1.5428	3.83255	0.655919
		floor-rise farming	15.2634	3.53468	3.02071	7.97919	0.728799	8.60738	3.18121	1.24722	3.52303	0.655919
		manual dry cleaning manure	15.5094	3.53468	3.35634	7.88957	0.728799	7.10976	3.18121	0.935415	2.37366	0.61948
		mechanical dry clearing manure	15.3815	3.53468	3.05315	8.0649	0.728799	7.28962	3.18121	1.09132	2.36117	0.655919
		Water flushing feces	15.3815	3.53468	3.05315	8.0649	0.728799	8.55773	3.18121	1.23424	3.48636	0.655919
	broiler
		bedding / litter	0.0479828	0.0247102	0.00440686	0.0188658	0	0.0277219	0.0222391	0.00166889	0.00381384	0
		Blistering feces	0.0487462	0.0247102	0.00455142	0.0194846	0	0.0277219	0.0222391	0.00166889	0.00381384	0
		floor-rise farming	0.0479828	0.0247102	0.00440686	0.0188658	0	0.0277219	0.0222391	0.00166889	0.00381384	0
		manual dry cleaning manure	0.0483422	0.0247102	0.00489651	0.0187356	0	0.0271871	0.0217449	0.00165653	0.00378562	0
		mechanical dry clearing manure	0.0487462	0.0247102	0.00455142	0.0194846	0	0.0261191	0.0210036	0.00139196	0.0037235	0
		Water flushing feces	0.0487462	0.0247102	0.00455142	0.0194846	0	0.027805	0.0222391	0.00169418	0.00387165	0
	dairy cattle
		bedding / litter	21.7479	5.69708	4.06466	10.7368	1.24936	12.1068	5.12737	1.6677	4.18734	1.12442
		Blistering feces	21.9383	5.69708	4.11695	10.8749	1.24936	13.5149	5.12737	2.08463	5.17852	1.12442
		floor-rise farming	21.7479	5.69708	4.06466	10.7368	1.24936	12.7103	5.12737	1.68862	4.76985	1.12442
		manual dry cleaning manure	22.0789	5.69708	4.51628	10.6162	1.24936	10.6695	5.12737	1.26647	3.21372	1.06196
		mechanical dry clearing manure	21.9383	5.69708	4.11695	10.8749	1.24936	10.9261	5.12737	1.47754	3.19681	1.12442
		Water flushing feces	21.9383	5.69708	4.11695	10.8749	1.24936	12.6303	5.12737	1.6677	4.71076	1.12442
	layer
		bedding / litter	0.301078	0.164801	0.0133009	0.122975	0	0.177344	0.148321	0.00435738	0.0246652	0
		Blistering feces	0.306092	0.164801	0.0137904	0.127501	0	0.178029	0.148321	0.00508361	0.0246241	0
		floor-rise farming	0.301078	0.164801	0.0133009	0.122975	0	0.177344	0.148321	0.00435738	0.0246652	0
		manual dry cleaning manure	0.302137	0.164801	0.0147788	0.122557	0	0.174562	0.145025	0.00505439	0.0244826	0
		mechanical dry clearing manure	0.306092	0.164801	0.0137904	0.127501	0	0.168415	0.140081	0.00425398	0.02408	0
		Water flushing feces	0.306092	0.164801	0.0137904	0.127501	0	0.177833	0.148321	0.00443079	0.0250808	0
	pig
		bedding / litter	2.76469	1.01032	0.825532	0.928837	0	1.74466	0.909286	0.344907	0.490468	0
		Blistering feces	2.80372	1.01032	0.8439	0.949503	0	1.82011	0.909286	0.431134	0.47969	0
		floor-rise farming	2.76469	1.01032	0.825532	0.928837	0	1.76246	0.909286	0.352254	0.500916	0
		manual dry cleaning manure	2.83348	1.01032	0.917258	0.905906	0	1.64355	0.909286	0.440317	0.293945	0
		mechanical dry clearing manure	2.80372	1.01032	0.8439	0.949503	0	1.66227	0.909286	0.352254	0.400732	0
		Water flushing feces	2.80372	1.01032	0.8439	0.949503	0	1.74466	0.909286	0.344907	0.490468	0
Beijing
	beef cattle
		bedding / litter	11.2714	2.61021	2.23067	5.8923	0.538188	6.03347	2.34919	0.911436	2.28848	0.484369
		Blistering feces	11.3586	2.61021	2.25463	5.95559	0.538188	6.80303	2.34919	1.13929	2.83018	0.484369
		floor-rise farming	11.175	2.61021	2.00411	6.02248	0.538188	6.35619	2.34919	0.921021	2.60161	0.484369
		manual dry cleaning manure	11.453	2.61021	2.47852	5.82612	0.538188	5.25027	2.34919	0.690765	1.75285	0.45746
		mechanical dry clearing manure	11.3586	2.61021	2.25463	5.95559	0.538188	5.38308	2.34919	0.805893	1.74363	0.484369
		Water flushing feces	11.3586	2.61021	2.25463	5.95559	0.538188	6.31953	2.34919	0.911436	2.57454	0.484369
	broiler
		bedding / litter	0.0529543	0.0272704	0.00486346	0.0208205	0	0.0305941	0.0245433	0.0018418	0.00420899	0
		Blistering feces	0.0537968	0.0272704	0.00502299	0.0215035	0	0.0305941	0.0245433	0.0018418	0.00420899	0
		floor-rise farming	0.0533872	0.0272704	0.00446488	0.0216519	0	0.0305941	0.0245433	0.0018418	0.00420899	0
		manual dry cleaning manure	0.053351	0.0272704	0.00540384	0.0206768	0	0.0300039	0.0239979	0.00182817	0.00417784	0
		mechanical dry clearing manure	0.0537968	0.0272704	0.00502299	0.0215035	0	0.0288253	0.0231798	0.00153618	0.00410929	0
		Water flushing feces	0.0537968	0.0272704	0.00502299	0.0215035	0	0.0306859	0.0245433	0.00186972	0.00427279	0
	dairy cattle
		bedding / litter	25.446	6.66585	4.75584	12.5625	1.46181	14.1656	5.99926	1.95129	4.89939	1.31563
		Blistering feces	25.6689	6.66585	4.81703	12.7242	1.46181	15.8131	5.99926	2.43911	6.05911	1.31563
		floor-rise farming	25.2765	6.66585	4.2818	12.8671	1.46181	14.8716	5.99926	1.97577	5.58095	1.31563
		manual dry cleaning manure	25.8334	6.66585	5.28426	12.4214	1.46181	12.4838	5.99926	1.48182	3.7602	1.24254
		mechanical dry clearing manure	25.6689	6.66585	4.81703	12.7242	1.46181	12.7841	5.99926	1.7288	3.74042	1.31563
		Water flushing feces	25.6689	6.66585	4.81703	12.7242	1.46181	14.778	5.99926	1.95129	5.51181	1.31563
	layer
		bedding / litter	0.288177	0.15774	0.012731	0.117706	0	0.169745	0.141966	0.00417067	0.0236084	0
		Blistering feces	0.292977	0.15774	0.0131995	0.122037	0	0.170401	0.141966	0.00486578	0.023569	0
		floor-rise farming	0.291925	0.15774	0.0117329	0.122452	0	0.169745	0.141966	0.00417067	0.0236084	0
		manual dry cleaning manure	0.289191	0.15774	0.0141456	0.117306	0	0.167082	0.138811	0.00483781	0.0234335	0
		mechanical dry clearing manure	0.292977	0.15774	0.0131995	0.122037	0	0.161199	0.134079	0.0040717	0.0230481	0
		Water flushing feces	0.292977	0.15774	0.0131995	0.122037	0	0.170213	0.141966	0.00424094	0.0240061	0
	pig
		bedding / litter	1.50769	0.550965	0.450194	0.506531	0	0.951431	0.495869	0.188091	0.267471	0
		Blistering feces	1.52898	0.550965	0.460211	0.517801	0	0.992576	0.495869	0.235114	0.261593	0
		floor-rise farming	1.49063	0.550965	0.409076	0.530584	0	0.961135	0.495869	0.192098	0.273169	0
		manual dry cleaning manure	1.54521	0.550965	0.500216	0.494025	0	0.851868	0.495869	0.192098	0.163901	0
		mechanical dry clearing manure	1.52898	0.550965	0.460211	0.517801	0	0.906501	0.495869	0.192098	0.218535	0
		Water flushing feces	1.52898	0.550965	0.460211	0.517801	0	0.951431	0.495869	0.188091	0.267471	0
Chongqing
	beef cattle
		bedding / litter	17.2459	3.9938	3.41307	9.01561	0.823464	9.23162	3.59442	1.39456	3.50152	0.741117
		Blistering feces	17.3794	3.9938	3.44973	9.11245	0.823464	10.4091	3.59442	1.7432	4.33036	0.741117
		floor-rise farming	17.0985	3.9938	3.06643	9.2148	0.823464	9.7254	3.59442	1.40922	3.98064	0.741117
		manual dry cleaning manure	17.5239	3.9938	3.7923	8.91435	0.823464	8.03326	3.59442	1.05692	2.68198	0.699944
		mechanical dry clearing manure	17.3794	3.9938	3.44973	9.11245	0.823464	8.23647	3.59442	1.23307	2.66787	0.741117
		Water flushing feces	17.3794	3.9938	3.44973	9.11245	0.823464	9.66931	3.59442	1.39456	3.93921	0.741117
	broiler
		bedding / litter	0.045574	0.0234697	0.00418563	0.0179187	0	0.0263302	0.0211227	0.00158511	0.00362238	0
		Blistering feces	0.0462991	0.0234697	0.00432293	0.0185065	0	0.0263302	0.0211227	0.00158511	0.00362238	0
		floor-rise farming	0.0459465	0.0234697	0.0038426	0.0186342	0	0.0263302	0.0211227	0.00158511	0.00362238	0
		manual dry cleaning manure	0.0459154	0.0234697	0.0046507	0.017795	0	0.0258222	0.0206533	0.00157337	0.00359557	0
		mechanical dry clearing manure	0.0462991	0.0234697	0.00432293	0.0185065	0	0.0248079	0.0199492	0.00132208	0.00353657	0
		Water flushing feces	0.0462991	0.0234697	0.00432293	0.0185065	0	0.0264091	0.0211227	0.00160913	0.00367729	0
	dairy cattle
		bedding / litter	20.5515	5.38367	3.84105	10.1461	1.18063	11.4408	4.84531	1.57596	3.95699	1.06257
		Blistering feces	20.7315	5.38367	3.89048	10.2767	1.18063	12.7715	4.84531	1.96995	4.89364	1.06257
		floor-rise farming	20.4146	5.38367	3.4582	10.3921	1.18063	12.0111	4.84531	1.59573	4.50746	1.06257
		manual dry cleaning manure	20.8643	5.38367	4.26784	10.0322	1.18063	10.0826	4.84531	1.1968	3.03693	1.00354
		mechanical dry clearing manure	20.7315	5.38367	3.89048	10.2767	1.18063	10.3251	4.84531	1.39626	3.02095	1.06257
		Water flushing feces	20.7315	5.38367	3.89048	10.2767	1.18063	11.9355	4.84531	1.57596	4.45162	1.06257
	layer
		bedding / litter	0.260654	0.142675	0.0115151	0.106464	0	0.153533	0.128407	0.00377234	0.0213536	0
		Blistering feces	0.264996	0.142675	0.0119389	0.110382	0	0.154126	0.128407	0.00440107	0.021318	0
		floor-rise farming	0.264045	0.142675	0.0106123	0.110758	0	0.153533	0.128407	0.00377234	0.0213536	0
		manual dry cleaning manure	0.261572	0.142675	0.0127946	0.106102	0	0.151125	0.125554	0.00437577	0.0211955	0
		mechanical dry clearing manure	0.264996	0.142675	0.0119389	0.110382	0	0.145803	0.121273	0.00368283	0.0208469	0
		Water flushing feces	0.264996	0.142675	0.0119389	0.110382	0	0.153957	0.128407	0.0038359	0.0217134	0
	pig
		bedding / litter	2.29857	0.839984	0.686351	0.77224	0	1.45052	0.755985	0.286757	0.407777	0
		Blistering feces	2.33103	0.839984	0.701622	0.789422	0	1.51325	0.755985	0.358447	0.398816	0
		floor-rise farming	2.27256	0.839984	0.623664	0.808911	0	1.46531	0.755985	0.292866	0.416464	0
		manual dry cleaning manure	2.35577	0.839984	0.762613	0.753174	0	1.29873	0.755985	0.292866	0.249878	0
		mechanical dry clearing manure	2.33103	0.839984	0.701622	0.789422	0	1.38202	0.755985	0.292866	0.333171	0
		Water flushing feces	2.33103	0.839984	0.701622	0.789422	0	1.45052	0.755985	0.286757	0.407777	0
Fujian
	beef cattle
		bedding / litter	15.2634	3.53468	3.02071	7.97919	0.728799	8.17036	3.18121	1.23424	3.09899	0.655919
		Blistering feces	15.3815	3.53468	3.05315	8.0649	0.728799	9.21248	3.18121	1.5428	3.83255	0.655919
		floor-rise farming	15.1329	3.53468	2.71392	8.15547	0.728799	8.60738	3.18121	1.24722	3.52303	0.655919
		manual dry cleaning manure	15.5094	3.53468	3.35634	7.88957	0.728799	7.10976	3.18121	0.935415	2.37366	0.61948
		mechanical dry clearing manure	15.3815	3.53468	3.05315	8.0649	0.728799	7.28962	3.18121	1.09132	2.36117	0.655919
		Water flushing feces	15.3815	3.53468	3.05315	8.0649	0.728799	8.55773	3.18121	1.23424	3.48636	0.655919
	broiler
		bedding / litter	0.0479828	0.0247102	0.00440686	0.0188658	0	0.0277219	0.0222391	0.00166889	0.00381384	0
		Blistering feces	0.0487462	0.0247102	0.00455142	0.0194846	0	0.0277219	0.0222391	0.00166889	0.00381384	0
		floor-rise farming	0.048375	0.0247102	0.0040457	0.0196192	0	0.0277219	0.0222391	0.00166889	0.00381384	0
		manual dry cleaning manure	0.0483422	0.0247102	0.00489651	0.0187356	0	0.0271871	0.0217449	0.00165653	0.00378562	0
		mechanical dry clearing manure	0.0487462	0.0247102	0.00455142	0.0194846	0	0.0261191	0.0210036	0.00139196	0.0037235	0
		Water flushing feces	0.0487462	0.0247102	0.00455142	0.0194846	0	0.027805	0.0222391	0.00169418	0.00387165	0
	dairy cattle
		bedding / litter	21.7479	5.69708	4.06466	10.7368	1.24936	12.1068	5.12737	1.6677	4.18734	1.12442
		Blistering feces	21.9383	5.69708	4.11695	10.8749	1.24936	13.5149	5.12737	2.08463	5.17852	1.12442
		floor-rise farming	21.603	5.69708	3.65952	10.9971	1.24936	12.7103	5.12737	1.68862	4.76985	1.12442
		manual dry cleaning manure	22.0789	5.69708	4.51628	10.6162	1.24936	10.6695	5.12737	1.26647	3.21372	1.06196
		mechanical dry clearing manure	21.9383	5.69708	4.11695	10.8749	1.24936	10.9261	5.12737	1.47754	3.19681	1.12442
		Water flushing feces	21.9383	5.69708	4.11695	10.8749	1.24936	12.6303	5.12737	1.6677	4.71076	1.12442
	layer
		bedding / litter	0.301078	0.164801	0.0133009	0.122975	0	0.177344	0.148321	0.00435738	0.0246652	0
		Blistering feces	0.306092	0.164801	0.0137904	0.127501	0	0.178029	0.148321	0.00508361	0.0246241	0
		floor-rise farming	0.304994	0.164801	0.0122581	0.127934	0	0.177344	0.148321	0.00435738	0.0246652	0
		manual dry cleaning manure	0.302137	0.164801	0.0147788	0.122557	0	0.174562	0.145025	0.00505439	0.0244826	0
		mechanical dry clearing manure	0.306092	0.164801	0.0137904	0.127501	0	0.168415	0.140081	0.00425398	0.02408	0
		Water flushing feces	0.306092	0.164801	0.0137904	0.127501	0	0.177833	0.148321	0.00443079	0.0250808	0
	pig
		bedding / litter	2.76469	1.01032	0.825532	0.928837	0	1.74466	0.909286	0.344907	0.490468	0
		Blistering feces	2.80372	1.01032	0.8439	0.949503	0	1.82011	0.909286	0.431134	0.47969	0
		floor-rise farming	2.7334	1.01032	0.750133	0.972945	0	1.76246	0.909286	0.352254	0.500916	0
		manual dry cleaning manure	2.83348	1.01032	0.917258	0.905906	0	1.52136	0.909286	0.308222	0.303852	0
		mechanical dry clearing manure	2.80372	1.01032	0.8439	0.949503	0	1.66227	0.909286	0.352254	0.400732	0
		Water flushing feces	2.80372	1.01032	0.8439	0.949503	0	1.74466	0.909286	0.344907	0.490468	0
Gansu
	beef cattle
		bedding / litter	12.527	2.90099	2.47916	6.5487	0.598142	6.7056	2.61089	1.01297	2.54341	0.538328
		Blistering feces	12.624	2.90099	2.50579	6.61904	0.598142	7.56089	2.61089	1.26621	3.14546	0.538328
		floor-rise farming	12.4199	2.90099	2.22737	6.69338	0.598142	7.06427	2.61089	1.02362	2.89143	0.538328
		manual dry cleaning manure	12.7289	2.90099	2.75462	6.47515	0.598142	5.83514	2.61089	0.767716	1.94812	0.508421
		mechanical dry clearing manure	12.624	2.90099	2.50579	6.61904	0.598142	5.98275	2.61089	0.895669	1.93787	0.538328
		Water flushing feces	12.624	2.90099	2.50579	6.61904	0.598142	7.02353	2.61089	1.01297	2.86134	0.538328
	broiler
		bedding / litter	0.0440708	0.0226955	0.00404757	0.0173277	0	0.0254617	0.020426	0.00153282	0.0035029	0
		Blistering feces	0.044772	0.0226955	0.00418034	0.0178961	0	0.0254617	0.020426	0.00153282	0.0035029	0
		floor-rise farming	0.044431	0.0226955	0.00371586	0.0180196	0	0.0254617	0.020426	0.00153282	0.0035029	0
		manual dry cleaning manure	0.0444009	0.0226955	0.0044973	0.0172081	0	0.0249705	0.0199721	0.00152148	0.00347698	0
		mechanical dry clearing manure	0.044772	0.0226955	0.00418034	0.0178961	0	0.0239896	0.0192912	0.00127847	0.00341993	0
		Water flushing feces	0.044772	0.0226955	0.00418034	0.0178961	0	0.0255381	0.020426	0.00155606	0.003556	0
	dairy cattle
		bedding / litter	26.8554	7.03504	5.01924	13.2583	1.54277	14.9501	6.33154	2.05936	5.17074	1.3885
		Blistering feces	27.0905	7.03504	5.08382	13.4289	1.54277	16.6889	6.33154	2.5742	6.3947	1.3885
		floor-rise farming	26.6765	7.03504	4.51896	13.5797	1.54277	15.6953	6.33154	2.0852	5.89006	1.3885
		manual dry cleaning manure	27.2642	7.03504	5.57694	13.1094	1.54277	13.1753	6.33154	1.5639	3.96846	1.31136
		mechanical dry clearing manure	27.0905	7.03504	5.08382	13.4289	1.54277	13.4922	6.33154	1.82455	3.94758	1.3885
		Water flushing feces	27.0905	7.03504	5.08382	13.4289	1.54277	15.5965	6.33154	2.05936	5.81709	1.3885
	layer
		bedding / litter	0.277385	0.151832	0.0122542	0.113298	0	0.163388	0.136649	0.00401448	0.0227242	0
		Blistering feces	0.282005	0.151832	0.0127052	0.117467	0	0.164019	0.136649	0.00468356	0.0226864	0
		floor-rise farming	0.280993	0.151832	0.0112935	0.117867	0	0.163388	0.136649	0.00401448	0.0227242	0
		manual dry cleaning manure	0.278361	0.151832	0.0136158	0.112913	0	0.160825	0.133613	0.00465664	0.022556	0
		mechanical dry clearing manure	0.282005	0.151832	0.0127052	0.117467	0	0.155162	0.129058	0.00391922	0.022185	0
		Water flushing feces	0.282005	0.151832	0.0127052	0.117467	0	0.163838	0.136649	0.00408212	0.0231071	0
	pig
		bedding / litter	1.91446	0.699613	0.571654	0.64319	0	1.20812	0.629651	0.238837	0.339633	0
		Blistering feces	1.94149	0.699613	0.584373	0.6575	0	1.26037	0.629651	0.298546	0.332169	0
		floor-rise farming	1.89279	0.699613	0.519443	0.673733	0	1.22044	0.629651	0.243924	0.346868	0
		manual dry cleaning manure	1.96209	0.699613	0.635171	0.62731	0	1.0817	0.629651	0.243924	0.208121	0
		mechanical dry clearing manure	1.94149	0.699613	0.584373	0.6575	0	1.15107	0.629651	0.243924	0.277494	0
		Water flushing feces	1.94149	0.699613	0.584373	0.6575	0	1.20812	0.629651	0.238837	0.339633	0
Guangdong
	beef cattle
		bedding / litter	16.8859	3.91042	3.34181	8.82738	0.806271	9.03887	3.51937	1.36544	3.42841	0.725644
		Blistering feces	17.0166	3.91042	3.37771	8.9222	0.806271	10.1918	3.51937	1.7068	4.23995	0.725644
		floor-rise farming	16.7415	3.91042	3.00241	9.02241	0.806271	9.52234	3.51937	1.3798	3.89753	0.725644
		manual dry cleaning manure	17.158	3.91042	3.71312	8.72824	0.806271	7.86554	3.51937	1.03485	2.62598	0.68533
		mechanical dry clearing manure	17.0166	3.91042	3.37771	8.9222	0.806271	8.06451	3.51937	1.20733	2.61217	0.725644
		Water flushing feces	17.0166	3.91042	3.37771	8.9222	0.806271	9.46743	3.51937	1.36544	3.85697	0.725644
	broiler
		bedding / litter	0.0381558	0.0196494	0.00350432	0.015002	0	0.0220443	0.0176845	0.00132709	0.00303275	0
		Blistering feces	0.0387628	0.0196494	0.00361927	0.0154941	0	0.0220443	0.0176845	0.00132709	0.00303275	0
		floor-rise farming	0.0384676	0.0196494	0.00321713	0.0156011	0	0.0220443	0.0176845	0.00132709	0.00303275	0
		manual dry cleaning manure	0.0384415	0.0196494	0.00389369	0.0148984	0	0.0216191	0.0172915	0.00131727	0.00301031	0
		mechanical dry clearing manure	0.0387628	0.0196494	0.00361927	0.0154941	0	0.0207698	0.016702	0.00110688	0.00296091	0
		Water flushing feces	0.0387628	0.0196494	0.00361927	0.0154941	0	0.0221104	0.0176845	0.00134721	0.00307872	0
	dairy cattle
		bedding / litter	17.0512	4.46674	3.18685	8.41806	0.979548	9.49225	4.02007	1.30755	3.28305	0.881593
		Blistering feces	17.2005	4.46674	3.22786	8.52638	0.979548	10.5963	4.02007	1.63443	4.06017	0.881593
		floor-rise farming	16.9376	4.46674	2.86921	8.62214	0.979548	9.96536	4.02007	1.32395	3.73976	0.881593
		manual dry cleaning manure	17.3108	4.46674	3.54095	8.32352	0.979548	8.36532	4.02007	0.99296	2.51968	0.832616
		mechanical dry clearing manure	17.2005	4.46674	3.22786	8.52638	0.979548	8.56654	4.02007	1.15845	2.50643	0.881593
		Water flushing feces	17.2005	4.46674	3.22786	8.52638	0.979548	9.90263	4.02007	1.30755	3.69343	0.881593
	layer
		bedding / litter	0.223945	0.122581	0.00989341	0.0914707	0	0.131911	0.110323	0.00324107	0.0183463	0
		Blistering feces	0.227676	0.122581	0.0102575	0.0948367	0	0.13242	0.110323	0.00378125	0.0183157	0
		floor-rise farming	0.226858	0.122581	0.00911776	0.0951592	0	0.131911	0.110323	0.00324107	0.0183463	0
		manual dry cleaning manure	0.224734	0.122581	0.0109927	0.0911596	0	0.129842	0.107872	0.00375952	0.0182105	0
		mechanical dry clearing manure	0.227676	0.122581	0.0102575	0.0948367	0	0.125269	0.104194	0.00316416	0.017911	0
		Water flushing feces	0.227676	0.122581	0.0102575	0.0948367	0	0.132274	0.110323	0.00329568	0.0186554	0
	pig
		bedding / litter	2.06146	0.753332	0.615548	0.692577	0	1.30089	0.677999	0.257176	0.365712	0
		Blistering feces	2.09056	0.753332	0.629244	0.707986	0	1.35714	0.677999	0.32147	0.357675	0
		floor-rise farming	2.03813	0.753332	0.559328	0.725465	0	1.31415	0.677999	0.262654	0.373502	0
		manual dry cleaning manure	2.11275	0.753332	0.683943	0.675478	0	1.16475	0.677999	0.262654	0.224101	0
		mechanical dry clearing manure	2.09056	0.753332	0.629244	0.707986	0	1.23945	0.677999	0.262654	0.298802	0
		Water flushing feces	2.09056	0.753332	0.629244	0.707986	0	1.30089	0.677999	0.257176	0.365712	0
Guangxi
	beef cattle
		bedding / litter	16.8859	3.91042	3.34181	8.82738	0.806271	9.03887	3.51937	1.36544	3.42841	0.725644
		Blistering feces	17.0166	3.91042	3.37771	8.9222	0.806271	10.1918	3.51937	1.7068	4.23995	0.725644
		floor-rise farming	16.7415	3.91042	3.00241	9.02241	0.806271	9.52234	3.51937	1.3798	3.89753	0.725644
		manual dry cleaning manure	17.158	3.91042	3.71312	8.72824	0.806271	7.86554	3.51937	1.03485	2.62598	0.68533
		mechanical dry clearing manure	17.0166	3.91042	3.37771	8.9222	0.806271	8.06451	3.51937	1.20733	2.61217	0.725644
		Water flushing feces	17.0166	3.91042	3.37771	8.9222	0.806271	9.46743	3.51937	1.36544	3.85697	0.725644
	broiler
		bedding / litter	0.0381558	0.0196494	0.00350432	0.015002	0	0.0220443	0.0176845	0.00132709	0.00303275	0
		Blistering feces	0.0387628	0.0196494	0.00361927	0.0154941	0	0.0220443	0.0176845	0.00132709	0.00303275	0
		floor-rise farming	0.0384676	0.0196494	0.00321713	0.0156011	0	0.0220443	0.0176845	0.00132709	0.00303275	0
		manual dry cleaning manure	0.0384415	0.0196494	0.00389369	0.0148984	0	0.0216191	0.0172915	0.00131727	0.00301031	0
		mechanical dry clearing manure	0.0387628	0.0196494	0.00361927	0.0154941	0	0.0207698	0.016702	0.00110688	0.00296091	0
		Water flushing feces	0.0387628	0.0196494	0.00361927	0.0154941	0	0.0221104	0.0176845	0.00134721	0.00307872	0
	dairy cattle
		bedding / litter	17.0512	4.46674	3.18685	8.41806	0.979548	9.49225	4.02007	1.30755	3.28305	0.881593
		Blistering feces	17.2005	4.46674	3.22786	8.52638	0.979548	10.5963	4.02007	1.63443	4.06017	0.881593
		floor-rise farming	16.9376	4.46674	2.86921	8.62214	0.979548	9.96536	4.02007	1.32395	3.73976	0.881593
		manual dry cleaning manure	17.3108	4.46674	3.54095	8.32352	0.979548	8.36532	4.02007	0.99296	2.51968	0.832616
		mechanical dry clearing manure	17.2005	4.46674	3.22786	8.52638	0.979548	8.56654	4.02007	1.15845	2.50643	0.881593
		Water flushing feces	17.2005	4.46674	3.22786	8.52638	0.979548	9.90263	4.02007	1.30755	3.69343	0.881593
	layer
		bedding / litter	0.223945	0.122581	0.00989341	0.0914707	0	0.131911	0.110323	0.00324107	0.0183463	0
		Blistering feces	0.227676	0.122581	0.0102575	0.0948367	0	0.13242	0.110323	0.00378125	0.0183157	0
		floor-rise farming	0.226858	0.122581	0.00911776	0.0951592	0	0.131911	0.110323	0.00324107	0.0183463	0
		manual dry cleaning manure	0.224734	0.122581	0.0109927	0.0911596	0	0.129842	0.107872	0.00375952	0.0182105	0
		mechanical dry clearing manure	0.227676	0.122581	0.0102575	0.0948367	0	0.125269	0.104194	0.00316416	0.017911	0
		Water flushing feces	0.227676	0.122581	0.0102575	0.0948367	0	0.132274	0.110323	0.00329568	0.0186554	0
	pig
		bedding / litter	2.06146	0.753332	0.615548	0.692577	0	1.30089	0.677999	0.257176	0.365712	0
		Blistering feces	2.09056	0.753332	0.629244	0.707986	0	1.35714	0.677999	0.32147	0.357675	0
		floor-rise farming	2.03813	0.753332	0.559328	0.725465	0	1.31415	0.677999	0.262654	0.373502	0
		manual dry cleaning manure	2.11275	0.753332	0.683943	0.675478	0	1.16475	0.677999	0.262654	0.224101	0
		mechanical dry clearing manure	2.09056	0.753332	0.629244	0.707986	0	1.23945	0.677999	0.262654	0.298802	0
		Water flushing feces	2.09056	0.753332	0.629244	0.707986	0	1.30089	0.677999	0.257176	0.365712	0
Guizhou
	beef cattle
		bedding / litter	17.2459	3.9938	3.41307	9.01561	0.823464	9.23162	3.59442	1.39456	3.50152	0.741117
		Blistering feces	17.3794	3.9938	3.44973	9.11245	0.823464	10.4091	3.59442	1.7432	4.33036	0.741117
		floor-rise farming	17.0985	3.9938	3.06643	9.2148	0.823464	9.7254	3.59442	1.40922	3.98064	0.741117
		manual dry cleaning manure	17.5239	3.9938	3.7923	8.91435	0.823464	8.03326	3.59442	1.05692	2.68198	0.699944
		mechanical dry clearing manure	17.3794	3.9938	3.44973	9.11245	0.823464	8.23647	3.59442	1.23307	2.66787	0.741117
		Water flushing feces	17.3794	3.9938	3.44973	9.11245	0.823464	9.66931	3.59442	1.39456	3.93921	0.741117
	broiler
		bedding / litter	0.045574	0.0234697	0.00418563	0.0179187	0	0.0263302	0.0211227	0.00158511	0.00362238	0
		Blistering feces	0.0462991	0.0234697	0.00432293	0.0185065	0	0.0263302	0.0211227	0.00158511	0.00362238	0
		floor-rise farming	0.0459465	0.0234697	0.0038426	0.0186342	0	0.0263302	0.0211227	0.00158511	0.00362238	0
		manual dry cleaning manure	0.0459154	0.0234697	0.0046507	0.017795	0	0.0258222	0.0206533	0.00157337	0.00359557	0
		mechanical dry clearing manure	0.0462991	0.0234697	0.00432293	0.0185065	0	0.0248079	0.0199492	0.00132208	0.00353657	0
		Water flushing feces	0.0462991	0.0234697	0.00432293	0.0185065	0	0.0264091	0.0211227	0.00160913	0.00367729	0
	dairy cattle
		bedding / litter	20.5515	5.38367	3.84105	10.1461	1.18063	11.4408	4.84531	1.57596	3.95699	1.06257
		Blistering feces	20.7315	5.38367	3.89048	10.2767	1.18063	12.7715	4.84531	1.96995	4.89364	1.06257
		floor-rise farming	20.4146	5.38367	3.4582	10.3921	1.18063	12.0111	4.84531	1.59573	4.50746	1.06257
		manual dry cleaning manure	20.8643	5.38367	4.26784	10.0322	1.18063	10.0826	4.84531	1.1968	3.03693	1.00354
		mechanical dry clearing manure	20.7315	5.38367	3.89048	10.2767	1.18063	10.3251	4.84531	1.39626	3.02095	1.06257
		Water flushing feces	20.7315	5.38367	3.89048	10.2767	1.18063	11.9355	4.84531	1.57596	4.45162	1.06257
	layer
		bedding / litter	0.260654	0.142675	0.0115151	0.106464	0	0.153533	0.128407	0.00377234	0.0213536	0
		Blistering feces	0.264996	0.142675	0.0119389	0.110382	0	0.154126	0.128407	0.00440107	0.021318	0
		floor-rise farming	0.264045	0.142675	0.0106123	0.110758	0	0.153533	0.128407	0.00377234	0.0213536	0
		manual dry cleaning manure	0.261572	0.142675	0.0127946	0.106102	0	0.151125	0.125554	0.00437577	0.0211955	0
		mechanical dry clearing manure	0.264996	0.142675	0.0119389	0.110382	0	0.145803	0.121273	0.00368283	0.0208469	0
		Water flushing feces	0.264996	0.142675	0.0119389	0.110382	0	0.153957	0.128407	0.0038359	0.0217134	0
	pig
		bedding / litter	2.29857	0.839984	0.686351	0.77224	0	1.45052	0.755985	0.286757	0.407777	0
		Blistering feces	2.33103	0.839984	0.701622	0.789422	0	1.51325	0.755985	0.358447	0.398816	0
		floor-rise farming	2.27256	0.839984	0.623664	0.808911	0	1.46531	0.755985	0.292866	0.416464	0
		manual dry cleaning manure	2.35577	0.839984	0.762613	0.753174	0	1.29873	0.755985	0.292866	0.249878	0
		mechanical dry clearing manure	2.33103	0.839984	0.701622	0.789422	0	1.38202	0.755985	0.292866	0.333171	0
		Water flushing feces	2.33103	0.839984	0.701622	0.789422	0	1.45052	0.755985	0.286757	0.407777	0
Hainan
	beef cattle
		bedding / litter	16.8859	3.91042	3.34181	8.82738	0.806271	9.03887	3.51937	1.36544	3.42841	0.725644
		Blistering feces	17.0166	3.91042	3.37771	8.9222	0.806271	10.1918	3.51937	1.7068	4.23995	0.725644
		floor-rise farming	16.7415	3.91042	3.00241	9.02241	0.806271	9.52234	3.51937	1.3798	3.89753	0.725644
		manual dry cleaning manure	17.158	3.91042	3.71312	8.72824	0.806271	7.86554	3.51937	1.03485	2.62598	0.68533
		mechanical dry clearing manure	17.0166	3.91042	3.37771	8.9222	0.806271	8.06451	3.51937	1.20733	2.61217	0.725644
		Water flushing feces	17.0166	3.91042	3.37771	8.9222	0.806271	9.46743	3.51937	1.36544	3.85697	0.725644
	broiler
		bedding / litter	0.0381558	0.0196494	0.00350432	0.015002	0	0.0220443	0.0176845	0.00132709	0.00303275	0
		Blistering feces	0.0387628	0.0196494	0.00361927	0.0154941	0	0.0220443	0.0176845	0.00132709	0.00303275	0
		floor-rise farming	0.0384676	0.0196494	0.00321713	0.0156011	0	0.0220443	0.0176845	0.00132709	0.00303275	0
		manual dry cleaning manure	0.0384415	0.0196494	0.00389369	0.0148984	0	0.0216191	0.0172915	0.00131727	0.00301031	0
		mechanical dry clearing manure	0.0387628	0.0196494	0.00361927	0.0154941	0	0.0207698	0.016702	0.00110688	0.00296091	0
		Water flushing feces	0.0387628	0.0196494	0.00361927	0.0154941	0	0.0221104	0.0176845	0.00134721	0.00307872	0
	dairy cattle
		bedding / litter	17.0512	4.46674	3.18685	8.41806	0.979548	9.49225	4.02007	1.30755	3.28305	0.881593
		Blistering feces	17.2005	4.46674	3.22786	8.52638	0.979548	10.5963	4.02007	1.63443	4.06017	0.881593
		floor-rise farming	16.9376	4.46674	2.86921	8.62214	0.979548	9.96536	4.02007	1.32395	3.73976	0.881593
		manual dry cleaning manure	17.3108	4.46674	3.54095	8.32352	0.979548	8.36532	4.02007	0.99296	2.51968	0.832616
		mechanical dry clearing manure	17.2005	4.46674	3.22786	8.52638	0.979548	8.56654	4.02007	1.15845	2.50643	0.881593
		Water flushing feces	17.2005	4.46674	3.22786	8.52638	0.979548	9.90263	4.02007	1.30755	3.69343	0.881593
	layer
		bedding / litter	0.223945	0.122581	0.00989341	0.0914707	0	0.131911	0.110323	0.00324107	0.0183463	0
		Blistering feces	0.227676	0.122581	0.0102575	0.0948367	0	0.13242	0.110323	0.00378125	0.0183157	0
		floor-rise farming	0.226858	0.122581	0.00911776	0.0951592	0	0.131911	0.110323	0.00324107	0.0183463	0
		manual dry cleaning manure	0.224734	0.122581	0.0109927	0.0911596	0	0.129842	0.107872	0.00375952	0.0182105	0
		mechanical dry clearing manure	0.227676	0.122581	0.0102575	0.0948367	0	0.125269	0.104194	0.00316416	0.017911	0
		Water flushing feces	0.227676	0.122581	0.0102575	0.0948367	0	0.132274	0.110323	0.00329568	0.0186554	0
	pig
		bedding / litter	2.06146	0.753332	0.615548	0.692577	0	1.30089	0.677999	0.257176	0.365712	0
		Blistering feces	2.09056	0.753332	0.629244	0.707986	0	1.35714	0.677999	0.32147	0.357675	0
		floor-rise farming	2.03813	0.753332	0.559328	0.725465	0	1.31415	0.677999	0.262654	0.373502	0
		manual dry cleaning manure	2.11275	0.753332	0.683943	0.675478	0	1.16475	0.677999	0.262654	0.224101	0
		mechanical dry clearing manure	2.09056	0.753332	0.629244	0.707986	0	1.23945	0.677999	0.262654	0.298802	0
		Water flushing feces	2.09056	0.753332	0.629244	0.707986	0	1.30089	0.677999	0.257176	0.365712	0
Hebei
	beef cattle
		bedding / litter	11.2714	2.61021	2.23067	5.8923	0.538188	6.03347	2.34919	0.911436	2.28848	0.484369
		Blistering feces	11.3586	2.61021	2.25463	5.95559	0.538188	6.80303	2.34919	1.13929	2.83018	0.484369
		floor-rise farming	11.175	2.61021	2.00411	6.02248	0.538188	6.35619	2.34919	0.921021	2.60161	0.484369
		manual dry cleaning manure	11.453	2.61021	2.47852	5.82612	0.538188	5.25027	2.34919	0.690765	1.75285	0.45746
		mechanical dry clearing manure	11.3586	2.61021	2.25463	5.95559	0.538188	5.38308	2.34919	0.805893	1.74363	0.484369
		Water flushing feces	11.3586	2.61021	2.25463	5.95559	0.538188	6.31953	2.34919	0.911436	2.57454	0.484369
	broiler
		bedding / litter	0.0529543	0.0272704	0.00486346	0.0208205	0	0.0305941	0.0245433	0.0018418	0.00420899	0
		Blistering feces	0.0537968	0.0272704	0.00502299	0.0215035	0	0.0305941	0.0245433	0.0018418	0.00420899	0
		floor-rise farming	0.0533872	0.0272704	0.00446488	0.0216519	0	0.0305941	0.0245433	0.0018418	0.00420899	0
		manual dry cleaning manure	0.053351	0.0272704	0.00540384	0.0206768	0	0.0300039	0.0239979	0.00182817	0.00417784	0
		mechanical dry clearing manure	0.0537968	0.0272704	0.00502299	0.0215035	0	0.0288253	0.0231798	0.00153618	0.00410929	0
		Water flushing feces	0.0537968	0.0272704	0.00502299	0.0215035	0	0.0306859	0.0245433	0.00186972	0.00427279	0
	dairy cattle
		bedding / litter	25.446	6.66585	4.75584	12.5625	1.46181	14.1656	5.99926	1.95129	4.89939	1.31563
		Blistering feces	25.6689	6.66585	4.81703	12.7242	1.46181	15.8131	5.99926	2.43911	6.05911	1.31563
		floor-rise farming	25.2765	6.66585	4.2818	12.8671	1.46181	14.8716	5.99926	1.97577	5.58095	1.31563
		manual dry cleaning manure	25.8334	6.66585	5.28426	12.4214	1.46181	12.4838	5.99926	1.48182	3.7602	1.24254
		mechanical dry clearing manure	25.6689	6.66585	4.81703	12.7242	1.46181	12.7841	5.99926	1.7288	3.74042	1.31563
		Water flushing feces	25.6689	6.66585	4.81703	12.7242	1.46181	14.778	5.99926	1.95129	5.51181	1.31563
	layer
		bedding / litter	0.288177	0.15774	0.012731	0.117706	0	0.169745	0.141966	0.00417067	0.0236084	0
		Blistering feces	0.292977	0.15774	0.0131995	0.122037	0	0.170401	0.141966	0.00486578	0.023569	0
		floor-rise farming	0.291925	0.15774	0.0117329	0.122452	0	0.169745	0.141966	0.00417067	0.0236084	0
		manual dry cleaning manure	0.289191	0.15774	0.0141456	0.117306	0	0.167082	0.138811	0.00483781	0.0234335	0
		mechanical dry clearing manure	0.292977	0.15774	0.0131995	0.122037	0	0.161199	0.134079	0.0040717	0.0230481	0
		Water flushing feces	0.292977	0.15774	0.0131995	0.122037	0	0.170213	0.141966	0.00424094	0.0240061	0
	pig
		bedding / litter	1.50769	0.550965	0.450194	0.506531	0	0.951431	0.495869	0.188091	0.267471	0
		Blistering feces	1.52898	0.550965	0.460211	0.517801	0	0.992576	0.495869	0.235114	0.261593	0
		floor-rise farming	1.49063	0.550965	0.409076	0.530584	0	0.961135	0.495869	0.192098	0.273169	0
		manual dry cleaning manure	1.54521	0.550965	0.500216	0.494025	0	0.851868	0.495869	0.192098	0.163901	0
		mechanical dry clearing manure	1.52898	0.550965	0.460211	0.517801	0	0.906501	0.495869	0.192098	0.218535	0
		Water flushing feces	1.52898	0.550965	0.460211	0.517801	0	0.951431	0.495869	0.188091	0.267471	0
Heilongjiang
	beef cattle
		bedding / litter	8.77691	2.03255	1.737	4.58828	0.419082	4.69821	1.82929	0.709727	1.78202	0.377174
		Blistering feces	8.84486	2.03255	1.75566	4.63757	0.419082	5.29746	1.82929	0.887159	2.20383	0.377174
		floor-rise farming	8.70187	2.03255	1.56059	4.68965	0.419082	4.94951	1.82929	0.71719	2.02585	0.377174
		manual dry cleaning manure	8.91838	2.03255	1.93	4.53675	0.419082	4.08833	1.82929	0.537893	1.36493	0.35622
		mechanical dry clearing manure	8.84486	2.03255	1.75566	4.63757	0.419082	4.19176	1.82929	0.627542	1.35775	0.377174
		Water flushing feces	8.84486	2.03255	1.75566	4.63757	0.419082	4.92096	1.82929	0.709727	2.00477	0.377174
	broiler
		bedding / litter	0.0364696	0.0187811	0.00334946	0.0143391	0	0.0210702	0.016903	0.00126845	0.00289873	0
		Blistering feces	0.0370498	0.0187811	0.00345933	0.0148094	0	0.0210702	0.016903	0.00126845	0.00289873	0
		floor-rise farming	0.0367677	0.0187811	0.00307496	0.0149117	0	0.0210702	0.016903	0.00126845	0.00289873	0
		manual dry cleaning manure	0.0367428	0.0187811	0.00372162	0.0142401	0	0.0206637	0.0165274	0.00125906	0.00287728	0
		mechanical dry clearing manure	0.0370498	0.0187811	0.00345933	0.0148094	0	0.019852	0.0159639	0.00105797	0.00283007	0
		Water flushing feces	0.0370498	0.0187811	0.00345933	0.0148094	0	0.0211333	0.016903	0.00128767	0.00294267	0
	dairy cattle
		bedding / litter	21.3924	5.60396	3.99822	10.5613	1.22894	11.909	5.04356	1.64044	4.1189	1.10604
		Blistering feces	21.5797	5.60396	4.04966	10.6972	1.22894	13.294	5.04356	2.05055	5.09388	1.10604
		floor-rise farming	21.2499	5.60396	3.5997	10.8173	1.22894	12.5025	5.04356	1.66102	4.69189	1.10604
		manual dry cleaning manure	21.718	5.60396	4.44247	10.4427	1.22894	10.4951	5.04356	1.24577	3.16119	1.0446
		mechanical dry clearing manure	21.5797	5.60396	4.04966	10.6972	1.22894	10.7476	5.04356	1.45339	3.14456	1.10604
		Water flushing feces	21.5797	5.60396	4.04966	10.6972	1.22894	12.4238	5.04356	1.64044	4.63376	1.10604
	layer
		bedding / litter	0.235919	0.129135	0.0104224	0.0963612	0	0.138963	0.116222	0.00341436	0.0193272	0
		Blistering feces	0.239848	0.129135	0.0108059	0.0999072	0	0.1395	0.116222	0.00398342	0.019295	0
		floor-rise farming	0.238987	0.129135	0.00960524	0.100247	0	0.138963	0.116222	0.00341436	0.0193272	0
		manual dry cleaning manure	0.236749	0.129135	0.0115804	0.0960334	0	0.136784	0.113639	0.00396052	0.0191841	0
		mechanical dry clearing manure	0.239848	0.129135	0.0108059	0.0999072	0	0.131967	0.109765	0.00333334	0.0188686	0
		Water flushing feces	0.239848	0.129135	0.0108059	0.0999072	0	0.139346	0.116222	0.00347189	0.0196529	0
	pig
		bedding / litter	1.63474	0.597394	0.488131	0.549215	0	1.03161	0.537655	0.203941	0.29001	0
		Blistering feces	1.65782	0.597394	0.498992	0.561434	0	1.07622	0.537655	0.254926	0.283637	0
		floor-rise farming	1.61624	0.597394	0.443548	0.575295	0	1.04213	0.537655	0.208285	0.296188	0
		manual dry cleaning manure	1.67542	0.597394	0.542368	0.535656	0	0.923652	0.537655	0.208285	0.177713	0
		mechanical dry clearing manure	1.65782	0.597394	0.498992	0.561434	0	0.98289	0.537655	0.208285	0.23695	0
		Water flushing feces	1.65782	0.597394	0.498992	0.561434	0	1.03161	0.537655	0.203941	0.29001	0
Henan
	beef cattle
		bedding / litter	16.8859	3.91042	3.34181	8.82738	0.806271	9.03887	3.51937	1.36544	3.42841	0.725644
		Blistering feces	17.0166	3.91042	3.37771	8.9222	0.806271	10.1918	3.51937	1.7068	4.23995	0.725644
		floor-rise farming	16.7415	3.91042	3.00241	9.02241	0.806271	9.52234	3.51937	1.3798	3.89753	0.725644
		manual dry cleaning manure	17.158	3.91042	3.71312	8.72824	0.806271	7.86554	3.51937	1.03485	2.62598	0.68533
		mechanical dry clearing manure	17.0166	3.91042	3.37771	8.9222	0.806271	8.06451	3.51937	1.20733	2.61217	0.725644
		Water flushing feces	17.0166	3.91042	3.37771	8.9222	0.806271	9.46743	3.51937	1.36544	3.85697	0.725644
	broiler
		bedding / litter	0.0381558	0.0196494	0.00350432	0.015002	0	0.0220443	0.0176845	0.00132709	0.00303275	0
		Blistering feces	0.0387628	0.0196494	0.00361927	0.0154941	0	0.0220443	0.0176845	0.00132709	0.00303275	0
		floor-rise farming	0.0384676	0.0196494	0.00321713	0.0156011	0	0.0220443	0.0176845	0.00132709	0.00303275	0
		manual dry cleaning manure	0.0384415	0.0196494	0.00389369	0.0148984	0	0.0216191	0.0172915	0.00131727	0.00301031	0
		mechanical dry clearing manure	0.0387628	0.0196494	0.00361927	0.0154941	0	0.0207698	0.016702	0.00110688	0.00296091	0
		Water flushing feces	0.0387628	0.0196494	0.00361927	0.0154941	0	0.0221104	0.0176845	0.00134721	0.00307872	0
	dairy cattle
		bedding / litter	17.0512	4.46674	3.18685	8.41806	0.979548	9.49225	4.02007	1.30755	3.28305	0.881593
		Blistering feces	17.2005	4.46674	3.22786	8.52638	0.979548	10.5963	4.02007	1.63443	4.06017	0.881593
		floor-rise farming	16.9376	4.46674	2.86921	8.62214	0.979548	9.96536	4.02007	1.32395	3.73976	0.881593
		manual dry cleaning manure	17.3108	4.46674	3.54095	8.32352	0.979548	8.36532	4.02007	0.99296	2.51968	0.832616
		mechanical dry clearing manure	17.2005	4.46674	3.22786	8.52638	0.979548	8.56654	4.02007	1.15845	2.50643	0.881593
		Water flushing feces	17.2005	4.46674	3.22786	8.52638	0.979548	9.90263	4.02007	1.30755	3.69343	0.881593
	layer
		bedding / litter	0.223945	0.122581	0.00989341	0.0914707	0	0.131911	0.110323	0.00324107	0.0183463	0
		Blistering feces	0.227676	0.122581	0.0102575	0.0948367	0	0.13242	0.110323	0.00378125	0.0183157	0
		floor-rise farming	0.226858	0.122581	0.00911776	0.0951592	0	0.131911	0.110323	0.00324107	0.0183463	0
		manual dry cleaning manure	0.224734	0.122581	0.0109927	0.0911596	0	0.129842	0.107872	0.00375952	0.0182105	0
		mechanical dry clearing manure	0.227676	0.122581	0.0102575	0.0948367	0	0.125269	0.104194	0.00316416	0.017911	0
		Water flushing feces	0.227676	0.122581	0.0102575	0.0948367	0	0.132274	0.110323	0.00329568	0.0186554	0
	pig
		bedding / litter	2.06146	0.753332	0.615548	0.692577	0	1.30089	0.677999	0.257176	0.365712	0
		Blistering feces	2.09056	0.753332	0.629244	0.707986	0	1.35714	0.677999	0.32147	0.357675	0
		floor-rise farming	2.03813	0.753332	0.559328	0.725465	0	1.31415	0.677999	0.262654	0.373502	0
		manual dry cleaning manure	2.11275	0.753332	0.683943	0.675478	0	1.16475	0.677999	0.262654	0.224101	0
		mechanical dry clearing manure	2.09056	0.753332	0.629244	0.707986	0	1.23945	0.677999	0.262654	0.298802	0
		Water flushing feces	2.09056	0.753332	0.629244	0.707986	0	1.30089	0.677999	0.257176	0.365712	0
Hubei
	beef cattle
		bedding / litter	16.8859	3.91042	3.34181	8.82738	0.806271	9.03887	3.51937	1.36544	3.42841	0.725644
		Blistering feces	17.0166	3.91042	3.37771	8.9222	0.806271	10.1918	3.51937	1.7068	4.23995	0.725644
		floor-rise farming	16.7415	3.91042	3.00241	9.02241	0.806271	9.52234	3.51937	1.3798	3.89753	0.725644
		manual dry cleaning manure	17.158	3.91042	3.71312	8.72824	0.806271	7.86554	3.51937	1.03485	2.62598	0.68533
		mechanical dry clearing manure	17.0166	3.91042	3.37771	8.9222	0.806271	8.06451	3.51937	1.20733	2.61217	0.725644
		Water flushing feces	17.0166	3.91042	3.37771	8.9222	0.806271	9.46743	3.51937	1.36544	3.85697	0.725644
	broiler
		bedding / litter	0.0381558	0.0196494	0.00350432	0.015002	0	0.0220443	0.0176845	0.00132709	0.00303275	0
		Blistering feces	0.0387628	0.0196494	0.00361927	0.0154941	0	0.0220443	0.0176845	0.00132709	0.00303275	0
		floor-rise farming	0.0384676	0.0196494	0.00321713	0.0156011	0	0.0220443	0.0176845	0.00132709	0.00303275	0
		manual dry cleaning manure	0.0384415	0.0196494	0.00389369	0.0148984	0	0.0216191	0.0172915	0.00131727	0.00301031	0
		mechanical dry clearing manure	0.0387628	0.0196494	0.00361927	0.0154941	0	0.0207698	0.016702	0.00110688	0.00296091	0
		Water flushing feces	0.0387628	0.0196494	0.00361927	0.0154941	0	0.0221104	0.0176845	0.00134721	0.00307872	0
	dairy cattle
		bedding / litter	17.0512	4.46674	3.18685	8.41806	0.979548	9.49225	4.02007	1.30755	3.28305	0.881593
		Blistering feces	17.2005	4.46674	3.22786	8.52638	0.979548	10.5963	4.02007	1.63443	4.06017	0.881593
		floor-rise farming	16.9376	4.46674	2.86921	8.62214	0.979548	9.96536	4.02007	1.32395	3.73976	0.881593
		manual dry cleaning manure	17.3108	4.46674	3.54095	8.32352	0.979548	8.36532	4.02007	0.99296	2.51968	0.832616
		mechanical dry clearing manure	17.2005	4.46674	3.22786	8.52638	0.979548	8.56654	4.02007	1.15845	2.50643	0.881593
		Water flushing feces	17.2005	4.46674	3.22786	8.52638	0.979548	9.90263	4.02007	1.30755	3.69343	0.881593
	layer
		bedding / litter	0.223945	0.122581	0.00989341	0.0914707	0	0.131911	0.110323	0.00324107	0.0183463	0
		Blistering feces	0.227676	0.122581	0.0102575	0.0948367	0	0.13242	0.110323	0.00378125	0.0183157	0
		floor-rise farming	0.226858	0.122581	0.00911776	0.0951592	0	0.131911	0.110323	0.00324107	0.0183463	0
		manual dry cleaning manure	0.224734	0.122581	0.0109927	0.0911596	0	0.129842	0.107872	0.00375952	0.0182105	0
		mechanical dry clearing manure	0.227676	0.122581	0.0102575	0.0948367	0	0.125269	0.104194	0.00316416	0.017911	0
		Water flushing feces	0.227676	0.122581	0.0102575	0.0948367	0	0.132274	0.110323	0.00329568	0.0186554	0
	pig
		bedding / litter	2.06146	0.753332	0.615548	0.692577	0	1.30089	0.677999	0.257176	0.365712	0
		Blistering feces	2.09056	0.753332	0.629244	0.707986	0	1.35714	0.677999	0.32147	0.357675	0
		floor-rise farming	2.03813	0.753332	0.559328	0.725465	0	1.31415	0.677999	0.262654	0.373502	0
		manual dry cleaning manure	2.11275	0.753332	0.683943	0.675478	0	1.16475	0.677999	0.262654	0.224101	0
		mechanical dry clearing manure	2.09056	0.753332	0.629244	0.707986	0	1.23945	0.677999	0.262654	0.298802	0
		Water flushing feces	2.09056	0.753332	0.629244	0.707986	0	1.30089	0.677999	0.257176	0.365712	0
Hunan
	beef cattle
		bedding / litter	16.8859	3.91042	3.34181	8.82738	0.806271	9.03887	3.51937	1.36544	3.42841	0.725644
		Blistering feces	17.0166	3.91042	3.37771	8.9222	0.806271	10.1918	3.51937	1.7068	4.23995	0.725644
		floor-rise farming	16.7415	3.91042	3.00241	9.02241	0.806271	9.52234	3.51937	1.3798	3.89753	0.725644
		manual dry cleaning manure	17.158	3.91042	3.71312	8.72824	0.806271	7.86554	3.51937	1.03485	2.62598	0.68533
		mechanical dry clearing manure	17.0166	3.91042	3.37771	8.9222	0.806271	8.06451	3.51937	1.20733	2.61217	0.725644
		Water flushing feces	17.0166	3.91042	3.37771	8.9222	0.806271	9.46743	3.51937	1.36544	3.85697	0.725644
	broiler
		bedding / litter	0.0381558	0.0196494	0.00350432	0.015002	0	0.0220443	0.0176845	0.00132709	0.00303275	0
		Blistering feces	0.0387628	0.0196494	0.00361927	0.0154941	0	0.0220443	0.0176845	0.00132709	0.00303275	0
		floor-rise farming	0.0384676	0.0196494	0.00321713	0.0156011	0	0.0220443	0.0176845	0.00132709	0.00303275	0
		manual dry cleaning manure	0.0384415	0.0196494	0.00389369	0.0148984	0	0.0216191	0.0172915	0.00131727	0.00301031	0
		mechanical dry clearing manure	0.0387628	0.0196494	0.00361927	0.0154941	0	0.0207698	0.016702	0.00110688	0.00296091	0
		Water flushing feces	0.0387628	0.0196494	0.00361927	0.0154941	0	0.0221104	0.0176845	0.00134721	0.00307872	0
	dairy cattle
		bedding / litter	17.0512	4.46674	3.18685	8.41806	0.979548	9.49225	4.02007	1.30755	3.28305	0.881593
		Blistering feces	17.2005	4.46674	3.22786	8.52638	0.979548	10.5963	4.02007	1.63443	4.06017	0.881593
		floor-rise farming	16.9376	4.46674	2.86921	8.62214	0.979548	9.96536	4.02007	1.32395	3.73976	0.881593
		manual dry cleaning manure	17.3108	4.46674	3.54095	8.32352	0.979548	8.36532	4.02007	0.99296	2.51968	0.832616
		mechanical dry clearing manure	17.2005	4.46674	3.22786	8.52638	0.979548	8.56654	4.02007	1.15845	2.50643	0.881593
		Water flushing feces	17.2005	4.46674	3.22786	8.52638	0.979548	9.90263	4.02007	1.30755	3.69343	0.881593
	layer
		bedding / litter	0.223945	0.122581	0.00989341	0.0914707	0	0.131911	0.110323	0.00324107	0.0183463	0
		Blistering feces	0.227676	0.122581	0.0102575	0.0948367	0	0.13242	0.110323	0.00378125	0.0183157	0
		floor-rise farming	0.226858	0.122581	0.00911776	0.0951592	0	0.131911	0.110323	0.00324107	0.0183463	0
		manual dry cleaning manure	0.224734	0.122581	0.0109927	0.0911596	0	0.129842	0.107872	0.00375952	0.0182105	0
		mechanical dry clearing manure	0.227676	0.122581	0.0102575	0.0948367	0	0.125269	0.104194	0.00316416	0.017911	0
		Water flushing feces	0.227676	0.122581	0.0102575	0.0948367	0	0.132274	0.110323	0.00329568	0.0186554	0
	pig
		bedding / litter	2.06146	0.753332	0.615548	0.692577	0	1.30089	0.677999	0.257176	0.365712	0
		Blistering feces	2.09056	0.753332	0.629244	0.707986	0	1.35714	0.677999	0.32147	0.357675	0
		floor-rise farming	2.03813	0.753332	0.559328	0.725465	0	1.31415	0.677999	0.262654	0.373502	0
		manual dry cleaning manure	2.11275	0.753332	0.683943	0.675478	0	1.16475	0.677999	0.262654	0.224101	0
		mechanical dry clearing manure	2.09056	0.753332	0.629244	0.707986	0	1.23945	0.677999	0.262654	0.298802	0
		Water flushing feces	2.09056	0.753332	0.629244	0.707986	0	1.30089	0.677999	0.257176	0.365712	0
Inner Mongolia
	beef cattle
		bedding / litter	11.2714	2.61021	2.23067	5.8923	0.538188	6.03347	2.34919	0.911436	2.28848	0.484369
		Blistering feces	11.3586	2.61021	2.25463	5.95559	0.538188	6.80303	2.34919	1.13929	2.83018	0.484369
		floor-rise farming	11.175	2.61021	2.00411	6.02248	0.538188	6.35619	2.34919	0.921021	2.60161	0.484369
		manual dry cleaning manure	11.453	2.61021	2.47852	5.82612	0.538188	5.25027	2.34919	0.690765	1.75285	0.45746
		mechanical dry clearing manure	11.3586	2.61021	2.25463	5.95559	0.538188	5.38308	2.34919	0.805893	1.74363	0.484369
		Water flushing feces	11.3586	2.61021	2.25463	5.95559	0.538188	6.31953	2.34919	0.911436	2.57454	0.484369
	broiler
		bedding / litter	0.0529543	0.0272704	0.00486346	0.0208205	0	0.0305941	0.0245433	0.0018418	0.00420899	0
		Blistering feces	0.0537968	0.0272704	0.00502299	0.0215035	0	0.0305941	0.0245433	0.0018418	0.00420899	0
		floor-rise farming	0.0533872	0.0272704	0.00446488	0.0216519	0	0.0305941	0.0245433	0.0018418	0.00420899	0
		manual dry cleaning manure	0.053351	0.0272704	0.00540384	0.0206768	0	0.0300039	0.0239979	0.00182817	0.00417784	0
		mechanical dry clearing manure	0.0537968	0.0272704	0.00502299	0.0215035	0	0.0288253	0.0231798	0.00153618	0.00410929	0
		Water flushing feces	0.0537968	0.0272704	0.00502299	0.0215035	0	0.0306859	0.0245433	0.00186972	0.00427279	0
	dairy cattle
		bedding / litter	25.446	6.66585	4.75584	12.5625	1.46181	14.1656	5.99926	1.95129	4.89939	1.31563
		Blistering feces	25.6689	6.66585	4.81703	12.7242	1.46181	15.8131	5.99926	2.43911	6.05911	1.31563
		floor-rise farming	25.2765	6.66585	4.2818	12.8671	1.46181	14.8716	5.99926	1.97577	5.58095	1.31563
		manual dry cleaning manure	25.8334	6.66585	5.28426	12.4214	1.46181	12.4838	5.99926	1.48182	3.7602	1.24254
		mechanical dry clearing manure	25.6689	6.66585	4.81703	12.7242	1.46181	12.7841	5.99926	1.7288	3.74042	1.31563
		Water flushing feces	25.6689	6.66585	4.81703	12.7242	1.46181	14.778	5.99926	1.95129	5.51181	1.31563
	layer
		bedding / litter	0.288177	0.15774	0.012731	0.117706	0	0.169745	0.141966	0.00417067	0.0236084	0
		Blistering feces	0.292977	0.15774	0.0131995	0.122037	0	0.170401	0.141966	0.00486578	0.023569	0
		floor-rise farming	0.291925	0.15774	0.0117329	0.122452	0	0.169745	0.141966	0.00417067	0.0236084	0
		manual dry cleaning manure	0.289191	0.15774	0.0141456	0.117306	0	0.167082	0.138811	0.00483781	0.0234335	0
		mechanical dry clearing manure	0.292977	0.15774	0.0131995	0.122037	0	0.161199	0.134079	0.0040717	0.0230481	0
		Water flushing feces	0.292977	0.15774	0.0131995	0.122037	0	0.170213	0.141966	0.00424094	0.0240061	0
	pig
		bedding / litter	1.50769	0.550965	0.450194	0.506531	0	0.951431	0.495869	0.188091	0.267471	0
		Blistering feces	1.52898	0.550965	0.460211	0.517801	0	0.992576	0.495869	0.235114	0.261593	0
		floor-rise farming	1.49063	0.550965	0.409076	0.530584	0	0.961135	0.495869	0.192098	0.273169	0
		manual dry cleaning manure	1.54521	0.550965	0.500216	0.494025	0	0.851868	0.495869	0.192098	0.163901	0
		mechanical dry clearing manure	1.52898	0.550965	0.460211	0.517801	0	0.906501	0.495869	0.192098	0.218535	0
		Water flushing feces	1.52898	0.550965	0.460211	0.517801	0	0.951431	0.495869	0.188091	0.267471	0
Jiangsu
	beef cattle
		bedding / litter	15.2634	3.53468	3.02071	7.97919	0.728799	8.17036	3.18121	1.23424	3.09899	0.655919
		Blistering feces	15.3815	3.53468	3.05315	8.0649	0.728799	9.21248	3.18121	1.5428	3.83255	0.655919
		floor-rise farming	15.1329	3.53468	2.71392	8.15547	0.728799	8.60738	3.18121	1.24722	3.52303	0.655919
		manual dry cleaning manure	15.5094	3.53468	3.35634	7.88957	0.728799	7.10976	3.18121	0.935415	2.37366	0.61948
		mechanical dry clearing manure	15.3815	3.53468	3.05315	8.0649	0.728799	7.28962	3.18121	1.09132	2.36117	0.655919
		Water flushing feces	15.3815	3.53468	3.05315	8.0649	0.728799	8.55773	3.18121	1.23424	3.48636	0.655919
	broiler
		bedding / litter	0.0479828	0.0247102	0.00440686	0.0188658	0	0.0277219	0.0222391	0.00166889	0.00381384	0
		Blistering feces	0.0487462	0.0247102	0.00455142	0.0194846	0	0.0277219	0.0222391	0.00166889	0.00381384	0
		floor-rise farming	0.048375	0.0247102	0.0040457	0.0196192	0	0.0277219	0.0222391	0.00166889	0.00381384	0
		manual dry cleaning manure	0.0483422	0.0247102	0.00489651	0.0187356	0	0.0271871	0.0217449	0.00165653	0.00378562	0
		mechanical dry clearing manure	0.0487462	0.0247102	0.00455142	0.0194846	0	0.0261191	0.0210036	0.00139196	0.0037235	0
		Water flushing feces	0.0487462	0.0247102	0.00455142	0.0194846	0	0.027805	0.0222391	0.00169418	0.00387165	0
	dairy cattle
		bedding / litter	21.7479	5.69708	4.06466	10.7368	1.24936	12.1068	5.12737	1.6677	4.18734	1.12442
		Blistering feces	21.9383	5.69708	4.11695	10.8749	1.24936	13.5149	5.12737	2.08463	5.17852	1.12442
		floor-rise farming	21.603	5.69708	3.65952	10.9971	1.24936	12.7103	5.12737	1.68862	4.76985	1.12442
		manual dry cleaning manure	22.0789	5.69708	4.51628	10.6162	1.24936	10.6695	5.12737	1.26647	3.21372	1.06196
		mechanical dry clearing manure	21.9383	5.69708	4.11695	10.8749	1.24936	10.9261	5.12737	1.47754	3.19681	1.12442
		Water flushing feces	21.9383	5.69708	4.11695	10.8749	1.24936	12.6303	5.12737	1.6677	4.71076	1.12442
	layer
		bedding / litter	0.301078	0.164801	0.0133009	0.122975	0	0.177344	0.148321	0.00435738	0.0246652	0
		Blistering feces	0.306092	0.164801	0.0137904	0.127501	0	0.178029	0.148321	0.00508361	0.0246241	0
		floor-rise farming	0.304994	0.164801	0.0122581	0.127934	0	0.177344	0.148321	0.00435738	0.0246652	0
		manual dry cleaning manure	0.302137	0.164801	0.0147788	0.122557	0	0.174562	0.145025	0.00505439	0.0244826	0
		mechanical dry clearing manure	0.306092	0.164801	0.0137904	0.127501	0	0.168415	0.140081	0.00425398	0.02408	0
		Water flushing feces	0.306092	0.164801	0.0137904	0.127501	0	0.177833	0.148321	0.00443079	0.0250808	0
	pig
		bedding / litter	2.76469	1.01032	0.825532	0.928837	0	1.74466	0.909286	0.344907	0.490468	0
		Blistering feces	2.80372	1.01032	0.8439	0.949503	0	1.82011	0.909286	0.431134	0.47969	0
		floor-rise farming	2.7334	1.01032	0.750133	0.972945	0	1.76246	0.909286	0.352254	0.500916	0
		manual dry cleaning manure	2.83348	1.01032	0.917258	0.905906	0	1.56209	0.909286	0.352254	0.300549	0
		mechanical dry clearing manure	2.80372	1.01032	0.8439	0.949503	0	1.66227	0.909286	0.352254	0.400732	0
		Water flushing feces	2.80372	1.01032	0.8439	0.949503	0	1.74466	0.909286	0.344907	0.490468	0
Jiangxi
	beef cattle
		bedding / litter	15.2634	3.53468	3.02071	7.97919	0.728799	8.17036	3.18121	1.23424	3.09899	0.655919
		Blistering feces	15.3815	3.53468	3.05315	8.0649	0.728799	9.21248	3.18121	1.5428	3.83255	0.655919
		floor-rise farming	15.1329	3.53468	2.71392	8.15547	0.728799	8.60738	3.18121	1.24722	3.52303	0.655919
		manual dry cleaning manure	15.5094	3.53468	3.35634	7.88957	0.728799	7.10976	3.18121	0.935415	2.37366	0.61948
		mechanical dry clearing manure	15.3815	3.53468	3.05315	8.0649	0.728799	7.28962	3.18121	1.09132	2.36117	0.655919
		Water flushing feces	15.3815	3.53468	3.05315	8.0649	0.728799	8.55773	3.18121	1.23424	3.48636	0.655919
	broiler
		bedding / litter	0.0479828	0.0247102	0.00440686	0.0188658	0	0.0277219	0.0222391	0.00166889	0.00381384	0
		Blistering feces	0.0487462	0.0247102	0.00455142	0.0194846	0	0.0277219	0.0222391	0.00166889	0.00381384	0
		floor-rise farming	0.048375	0.0247102	0.0040457	0.0196192	0	0.0277219	0.0222391	0.00166889	0.00381384	0
		manual dry cleaning manure	0.0483422	0.0247102	0.00489651	0.0187356	0	0.0271871	0.0217449	0.00165653	0.00378562	0
		mechanical dry clearing manure	0.0487462	0.0247102	0.00455142	0.0194846	0	0.0261191	0.0210036	0.00139196	0.0037235	0
		Water flushing feces	0.0487462	0.0247102	0.00455142	0.0194846	0	0.027805	0.0222391	0.00169418	0.00387165	0
	dairy cattle
		bedding / litter	21.7479	5.69708	4.06466	10.7368	1.24936	12.1068	5.12737	1.6677	4.18734	1.12442
		Blistering feces	21.9383	5.69708	4.11695	10.8749	1.24936	13.5149	5.12737	2.08463	5.17852	1.12442
		floor-rise farming	21.603	5.69708	3.65952	10.9971	1.24936	12.7103	5.12737	1.68862	4.76985	1.12442
		manual dry cleaning manure	22.0789	5.69708	4.51628	10.6162	1.24936	10.6695	5.12737	1.26647	3.21372	1.06196
		mechanical dry clearing manure	21.9383	5.69708	4.11695	10.8749	1.24936	10.9261	5.12737	1.47754	3.19681	1.12442
		Water flushing feces	21.9383	5.69708	4.11695	10.8749	1.24936	12.6303	5.12737	1.6677	4.71076	1.12442
	layer
		bedding / litter	0.301078	0.164801	0.0133009	0.122975	0	0.177344	0.148321	0.00435738	0.0246652	0
		Blistering feces	0.306092	0.164801	0.0137904	0.127501	0	0.178029	0.148321	0.00508361	0.0246241	0
		floor-rise farming	0.304994	0.164801	0.0122581	0.127934	0	0.177344	0.148321	0.00435738	0.0246652	0
		manual dry cleaning manure	0.302137	0.164801	0.0147788	0.122557	0	0.174562	0.145025	0.00505439	0.0244826	0
		mechanical dry clearing manure	0.306092	0.164801	0.0137904	0.127501	0	0.168415	0.140081	0.00425398	0.02408	0
		Water flushing feces	0.306092	0.164801	0.0137904	0.127501	0	0.177833	0.148321	0.00443079	0.0250808	0
	pig
		bedding / litter	2.76469	1.01032	0.825532	0.928837	0	1.74466	0.909286	0.344907	0.490468	0
		Blistering feces	2.80372	1.01032	0.8439	0.949503	0	1.82011	0.909286	0.431134	0.47969	0
		floor-rise farming	2.7334	1.01032	0.750133	0.972945	0	1.76246	0.909286	0.352254	0.500916	0
		manual dry cleaning manure	2.83348	1.01032	0.917258	0.905906	0	1.56209	0.909286	0.352254	0.300549	0
		mechanical dry clearing manure	2.80372	1.01032	0.8439	0.949503	0	1.66227	0.909286	0.352254	0.400732	0
		Water flushing feces	2.80372	1.01032	0.8439	0.949503	0	1.74466	0.909286	0.344907	0.490468	0
Jilin
	beef cattle
		bedding / litter	8.77691	2.03255	1.737	4.58828	0.419082	4.69821	1.82929	0.709727	1.78202	0.377174
		Blistering feces	8.84486	2.03255	1.75566	4.63757	0.419082	5.29746	1.82929	0.887159	2.20383	0.377174
		floor-rise farming	8.70187	2.03255	1.56059	4.68965	0.419082	4.94951	1.82929	0.71719	2.02585	0.377174
		manual dry cleaning manure	8.91838	2.03255	1.93	4.53675	0.419082	4.08833	1.82929	0.537893	1.36493	0.35622
		mechanical dry clearing manure	8.84486	2.03255	1.75566	4.63757	0.419082	4.19176	1.82929	0.627542	1.35775	0.377174
		Water flushing feces	8.84486	2.03255	1.75566	4.63757	0.419082	4.92096	1.82929	0.709727	2.00477	0.377174
	broiler
		bedding / litter	0.0364696	0.0187811	0.00334946	0.0143391	0	0.0210702	0.016903	0.00126845	0.00289873	0
		Blistering feces	0.0370498	0.0187811	0.00345933	0.0148094	0	0.0210702	0.016903	0.00126845	0.00289873	0
		floor-rise farming	0.0367677	0.0187811	0.00307496	0.0149117	0	0.0210702	0.016903	0.00126845	0.00289873	0
		manual dry cleaning manure	0.0367428	0.0187811	0.00372162	0.0142401	0	0.0206637	0.0165274	0.00125906	0.00287728	0
		mechanical dry clearing manure	0.0370498	0.0187811	0.00345933	0.0148094	0	0.019852	0.0159639	0.00105797	0.00283007	0
		Water flushing feces	0.0370498	0.0187811	0.00345933	0.0148094	0	0.0211333	0.016903	0.00128767	0.00294267	0
	dairy cattle
		bedding / litter	21.3924	5.60396	3.99822	10.5613	1.22894	11.909	5.04356	1.64044	4.1189	1.10604
		Blistering feces	21.5797	5.60396	4.04966	10.6972	1.22894	13.294	5.04356	2.05055	5.09388	1.10604
		floor-rise farming	21.2499	5.60396	3.5997	10.8173	1.22894	12.5025	5.04356	1.66102	4.69189	1.10604
		manual dry cleaning manure	21.718	5.60396	4.44247	10.4427	1.22894	10.4951	5.04356	1.24577	3.16119	1.0446
		mechanical dry clearing manure	21.5797	5.60396	4.04966	10.6972	1.22894	10.7476	5.04356	1.45339	3.14456	1.10604
		Water flushing feces	21.5797	5.60396	4.04966	10.6972	1.22894	12.4238	5.04356	1.64044	4.63376	1.10604
	layer
		bedding / litter	0.235919	0.129135	0.0104224	0.0963612	0	0.138963	0.116222	0.00341436	0.0193272	0
		Blistering feces	0.239848	0.129135	0.0108059	0.0999072	0	0.1395	0.116222	0.00398342	0.019295	0
		floor-rise farming	0.238987	0.129135	0.00960524	0.100247	0	0.138963	0.116222	0.00341436	0.0193272	0
		manual dry cleaning manure	0.236749	0.129135	0.0115804	0.0960334	0	0.136784	0.113639	0.00396052	0.0191841	0
		mechanical dry clearing manure	0.239848	0.129135	0.0108059	0.0999072	0	0.131967	0.109765	0.00333334	0.0188686	0
		Water flushing feces	0.239848	0.129135	0.0108059	0.0999072	0	0.139346	0.116222	0.00347189	0.0196529	0
	pig
		bedding / litter	1.63474	0.597394	0.488131	0.549215	0	1.03161	0.537655	0.203941	0.29001	0
		Blistering feces	1.65782	0.597394	0.498992	0.561434	0	1.07622	0.537655	0.254926	0.283637	0
		floor-rise farming	1.61624	0.597394	0.443548	0.575295	0	1.04213	0.537655	0.208285	0.296188	0
		manual dry cleaning manure	1.67542	0.597394	0.542368	0.535656	0	0.923652	0.537655	0.208285	0.177713	0
		mechanical dry clearing manure	1.65782	0.597394	0.498992	0.561434	0	0.98289	0.537655	0.208285	0.23695	0
		Water flushing feces	1.65782	0.597394	0.498992	0.561434	0	1.03161	0.537655	0.203941	0.29001	0
Liaoning
	beef cattle
		bedding / litter	8.77691	2.03255	1.737	4.58828	0.419082	4.69821	1.82929	0.709727	1.78202	0.377174
		Blistering feces	8.84486	2.03255	1.75566	4.63757	0.419082	5.29746	1.82929	0.887159	2.20383	0.377174
		floor-rise farming	8.70187	2.03255	1.56059	4.68965	0.419082	4.94951	1.82929	0.71719	2.02585	0.377174
		manual dry cleaning manure	8.91838	2.03255	1.93	4.53675	0.419082	4.08833	1.82929	0.537893	1.36493	0.35622
		mechanical dry clearing manure	8.84486	2.03255	1.75566	4.63757	0.419082	4.19176	1.82929	0.627542	1.35775	0.377174
		Water flushing feces	8.84486	2.03255	1.75566	4.63757	0.419082	4.92096	1.82929	0.709727	2.00477	0.377174
	broiler
		bedding / litter	0.0364696	0.0187811	0.00334946	0.0143391	0	0.0210702	0.016903	0.00126845	0.00289873	0
		Blistering feces	0.0370498	0.0187811	0.00345933	0.0148094	0	0.0210702	0.016903	0.00126845	0.00289873	0
		floor-rise farming	0.0367677	0.0187811	0.00307496	0.0149117	0	0.0210702	0.016903	0.00126845	0.00289873	0
		manual dry cleaning manure	0.0367428	0.0187811	0.00372162	0.0142401	0	0.0206637	0.0165274	0.00125906	0.00287728	0
		mechanical dry clearing manure	0.0370498	0.0187811	0.00345933	0.0148094	0	0.019852	0.0159639	0.00105797	0.00283007	0
		Water flushing feces	0.0370498	0.0187811	0.00345933	0.0148094	0	0.0211333	0.016903	0.00128767	0.00294267	0
	dairy cattle
		bedding / litter	21.3924	5.60396	3.99822	10.5613	1.22894	11.909	5.04356	1.64044	4.1189	1.10604
		Blistering feces	21.5797	5.60396	4.04966	10.6972	1.22894	13.294	5.04356	2.05055	5.09388	1.10604
		floor-rise farming	21.2499	5.60396	3.5997	10.8173	1.22894	12.5025	5.04356	1.66102	4.69189	1.10604
		manual dry cleaning manure	21.718	5.60396	4.44247	10.4427	1.22894	10.4951	5.04356	1.24577	3.16119	1.0446
		mechanical dry clearing manure	21.5797	5.60396	4.04966	10.6972	1.22894	10.7476	5.04356	1.45339	3.14456	1.10604
		Water flushing feces	21.5797	5.60396	4.04966	10.6972	1.22894	12.4238	5.04356	1.64044	4.63376	1.10604
	layer
		bedding / litter	0.235919	0.129135	0.0104224	0.0963612	0	0.138963	0.116222	0.00341436	0.0193272	0
		Blistering feces	0.239848	0.129135	0.0108059	0.0999072	0	0.1395	0.116222	0.00398342	0.019295	0
		floor-rise farming	0.238987	0.129135	0.00960524	0.100247	0	0.138963	0.116222	0.00341436	0.0193272	0
		manual dry cleaning manure	0.236749	0.129135	0.0115804	0.0960334	0	0.136784	0.113639	0.00396052	0.0191841	0
		mechanical dry clearing manure	0.239848	0.129135	0.0108059	0.0999072	0	0.131967	0.109765	0.00333334	0.0188686	0
		Water flushing feces	0.239848	0.129135	0.0108059	0.0999072	0	0.139346	0.116222	0.00347189	0.0196529	0
	pig
		bedding / litter	1.63474	0.597394	0.488131	0.549215	0	1.03161	0.537655	0.203941	0.29001	0
		Blistering feces	1.65782	0.597394	0.498992	0.561434	0	1.07622	0.537655	0.254926	0.283637	0
		floor-rise farming	1.61624	0.597394	0.443548	0.575295	0	1.04213	0.537655	0.208285	0.296188	0
		manual dry cleaning manure	1.67542	0.597394	0.542368	0.535656	0	0.923652	0.537655	0.208285	0.177713	0
		mechanical dry clearing manure	1.65782	0.597394	0.498992	0.561434	0	0.98289	0.537655	0.208285	0.23695	0
		Water flushing feces	1.65782	0.597394	0.498992	0.561434	0	1.03161	0.537655	0.203941	0.29001	0
Ningxia
	beef cattle
		bedding / litter	12.527	2.90099	2.47916	6.5487	0.598142	6.7056	2.61089	1.01297	2.54341	0.538328
		Blistering feces	12.624	2.90099	2.50579	6.61904	0.598142	7.56089	2.61089	1.26621	3.14546	0.538328
		floor-rise farming	12.4199	2.90099	2.22737	6.69338	0.598142	7.06427	2.61089	1.02362	2.89143	0.538328
		manual dry cleaning manure	12.7289	2.90099	2.75462	6.47515	0.598142	5.83514	2.61089	0.767716	1.94812	0.508421
		mechanical dry clearing manure	12.624	2.90099	2.50579	6.61904	0.598142	5.98275	2.61089	0.895669	1.93787	0.538328
		Water flushing feces	12.624	2.90099	2.50579	6.61904	0.598142	7.02353	2.61089	1.01297	2.86134	0.538328
	broiler
		bedding / litter	0.0440708	0.0226955	0.00404757	0.0173277	0	0.0254617	0.020426	0.00153282	0.0035029	0
		Blistering feces	0.044772	0.0226955	0.00418034	0.0178961	0	0.0254617	0.020426	0.00153282	0.0035029	0
		floor-rise farming	0.044431	0.0226955	0.00371586	0.0180196	0	0.0254617	0.020426	0.00153282	0.0035029	0
		manual dry cleaning manure	0.0444009	0.0226955	0.0044973	0.0172081	0	0.0249705	0.0199721	0.00152148	0.00347698	0
		mechanical dry clearing manure	0.044772	0.0226955	0.00418034	0.0178961	0	0.0239896	0.0192912	0.00127847	0.00341993	0
		Water flushing feces	0.044772	0.0226955	0.00418034	0.0178961	0	0.0255381	0.020426	0.00155606	0.003556	0
	dairy cattle
		bedding / litter	26.8554	7.03504	5.01924	13.2583	1.54277	14.9501	6.33154	2.05936	5.17074	1.3885
		Blistering feces	27.0905	7.03504	5.08382	13.4289	1.54277	16.6889	6.33154	2.5742	6.3947	1.3885
		floor-rise farming	26.6765	7.03504	4.51896	13.5797	1.54277	15.6953	6.33154	2.0852	5.89006	1.3885
		manual dry cleaning manure	27.2642	7.03504	5.57694	13.1094	1.54277	13.1753	6.33154	1.5639	3.96846	1.31136
		mechanical dry clearing manure	27.0905	7.03504	5.08382	13.4289	1.54277	13.4922	6.33154	1.82455	3.94758	1.3885
		Water flushing feces	27.0905	7.03504	5.08382	13.4289	1.54277	15.5965	6.33154	2.05936	5.81709	1.3885
	layer
		bedding / litter	0.277385	0.151832	0.0122542	0.113298	0	0.163388	0.136649	0.00401448	0.0227242	0
		Blistering feces	0.282005	0.151832	0.0127052	0.117467	0	0.164019	0.136649	0.00468356	0.0226864	0
		floor-rise farming	0.280993	0.151832	0.0112935	0.117867	0	0.163388	0.136649	0.00401448	0.0227242	0
		manual dry cleaning manure	0.278361	0.151832	0.0136158	0.112913	0	0.160825	0.133613	0.00465664	0.022556	0
		mechanical dry clearing manure	0.282005	0.151832	0.0127052	0.117467	0	0.155162	0.129058	0.00391922	0.022185	0
		Water flushing feces	0.282005	0.151832	0.0127052	0.117467	0	0.163838	0.136649	0.00408212	0.0231071	0
	pig
		bedding / litter	1.91446	0.699613	0.571654	0.64319	0	1.20812	0.629651	0.238837	0.339633	0
		Blistering feces	1.94149	0.699613	0.584373	0.6575	0	1.26037	0.629651	0.298546	0.332169	0
		floor-rise farming	1.89279	0.699613	0.519443	0.673733	0	1.22044	0.629651	0.243924	0.346868	0
		manual dry cleaning manure	1.96209	0.699613	0.635171	0.62731	0	1.0817	0.629651	0.243924	0.208121	0
		mechanical dry clearing manure	1.94149	0.699613	0.584373	0.6575	0	1.15107	0.629651	0.243924	0.277494	0
		Water flushing feces	1.94149	0.699613	0.584373	0.6575	0	1.20812	0.629651	0.238837	0.339633	0
Qinghai
	beef cattle
		bedding / litter	12.527	2.90099	2.47916	6.5487	0.598142	6.7056	2.61089	1.01297	2.54341	0.538328
		Blistering feces	12.624	2.90099	2.50579	6.61904	0.598142	7.56089	2.61089	1.26621	3.14546	0.538328
		floor-rise farming	12.4199	2.90099	2.22737	6.69338	0.598142	7.06427	2.61089	1.02362	2.89143	0.538328
		manual dry cleaning manure	12.7289	2.90099	2.75462	6.47515	0.598142	5.83514	2.61089	0.767716	1.94812	0.508421
		mechanical dry clearing manure	12.624	2.90099	2.50579	6.61904	0.598142	5.98275	2.61089	0.895669	1.93787	0.538328
		Water flushing feces	12.624	2.90099	2.50579	6.61904	0.598142	7.02353	2.61089	1.01297	2.86134	0.538328
	broiler
		bedding / litter	0.0440708	0.0226955	0.00404757	0.0173277	0	0.0254617	0.020426	0.00153282	0.0035029	0
		Blistering feces	0.044772	0.0226955	0.00418034	0.0178961	0	0.0254617	0.020426	0.00153282	0.0035029	0
		floor-rise farming	0.044431	0.0226955	0.00371586	0.0180196	0	0.0254617	0.020426	0.00153282	0.0035029	0
		manual dry cleaning manure	0.0444009	0.0226955	0.0044973	0.0172081	0	0.0249705	0.0199721	0.00152148	0.00347698	0
		mechanical dry clearing manure	0.044772	0.0226955	0.00418034	0.0178961	0	0.0239896	0.0192912	0.00127847	0.00341993	0
		Water flushing feces	0.044772	0.0226955	0.00418034	0.0178961	0	0.0255381	0.020426	0.00155606	0.003556	0
	dairy cattle
		bedding / litter	26.8554	7.03504	5.01924	13.2583	1.54277	14.9501	6.33154	2.05936	5.17074	1.3885
		Blistering feces	27.0905	7.03504	5.08382	13.4289	1.54277	16.6889	6.33154	2.5742	6.3947	1.3885
		floor-rise farming	26.6765	7.03504	4.51896	13.5797	1.54277	15.6953	6.33154	2.0852	5.89006	1.3885
		manual dry cleaning manure	27.2642	7.03504	5.57694	13.1094	1.54277	13.1753	6.33154	1.5639	3.96846	1.31136
		mechanical dry clearing manure	27.0905	7.03504	5.08382	13.4289	1.54277	13.4922	6.33154	1.82455	3.94758	1.3885
		Water flushing feces	27.0905	7.03504	5.08382	13.4289	1.54277	15.5965	6.33154	2.05936	5.81709	1.3885
	layer
		bedding / litter	0.277385	0.151832	0.0122542	0.113298	0	0.163388	0.136649	0.00401448	0.0227242	0
		Blistering feces	0.282005	0.151832	0.0127052	0.117467	0	0.164019	0.136649	0.00468356	0.0226864	0
		floor-rise farming	0.280993	0.151832	0.0112935	0.117867	0	0.163388	0.136649	0.00401448	0.0227242	0
		manual dry cleaning manure	0.278361	0.151832	0.0136158	0.112913	0	0.160825	0.133613	0.00465664	0.022556	0
		mechanical dry clearing manure	0.282005	0.151832	0.0127052	0.117467	0	0.155162	0.129058	0.00391922	0.022185	0
		Water flushing feces	0.282005	0.151832	0.0127052	0.117467	0	0.163838	0.136649	0.00408212	0.0231071	0
	pig
		bedding / litter	1.91446	0.699613	0.571654	0.64319	0	1.20812	0.629651	0.238837	0.339633	0
		Blistering feces	1.94149	0.699613	0.584373	0.6575	0	1.26037	0.629651	0.298546	0.332169	0
		floor-rise farming	1.89279	0.699613	0.519443	0.673733	0	1.22044	0.629651	0.243924	0.346868	0
		manual dry cleaning manure	1.96209	0.699613	0.635171	0.62731	0	1.0817	0.629651	0.243924	0.208121	0
		mechanical dry clearing manure	1.94149	0.699613	0.584373	0.6575	0	1.15107	0.629651	0.243924	0.277494	0
		Water flushing feces	1.94149	0.699613	0.584373	0.6575	0	1.20812	0.629651	0.238837	0.339633	0
Shaanxi
	beef cattle
		bedding / litter	11.2714	2.61021	2.23067	5.8923	0.538188	6.03347	2.34919	0.911436	2.28848	0.484369
		Blistering feces	11.3586	2.61021	2.25463	5.95559	0.538188	6.80303	2.34919	1.13929	2.83018	0.484369
		floor-rise farming	11.175	2.61021	2.00411	6.02248	0.538188	6.35619	2.34919	0.921021	2.60161	0.484369
		manual dry cleaning manure	11.453	2.61021	2.47852	5.82612	0.538188	5.25027	2.34919	0.690765	1.75285	0.45746
		mechanical dry clearing manure	11.3586	2.61021	2.25463	5.95559	0.538188	5.38308	2.34919	0.805893	1.74363	0.484369
		Water flushing feces	11.3586	2.61021	2.25463	5.95559	0.538188	6.31953	2.34919	0.911436	2.57454	0.484369
	broiler
		bedding / litter	0.0529543	0.0272704	0.00486346	0.0208205	0	0.0305941	0.0245433	0.0018418	0.00420899	0
		Blistering feces	0.0537968	0.0272704	0.00502299	0.0215035	0	0.0305941	0.0245433	0.0018418	0.00420899	0
		floor-rise farming	0.0533872	0.0272704	0.00446488	0.0216519	0	0.0305941	0.0245433	0.0018418	0.00420899	0
		manual dry cleaning manure	0.053351	0.0272704	0.00540384	0.0206768	0	0.0300039	0.0239979	0.00182817	0.00417784	0
		mechanical dry clearing manure	0.0537968	0.0272704	0.00502299	0.0215035	0	0.0288253	0.0231798	0.00153618	0.00410929	0
		Water flushing feces	0.0537968	0.0272704	0.00502299	0.0215035	0	0.0306859	0.0245433	0.00186972	0.00427279	0
	dairy cattle
		bedding / litter	25.446	6.66585	4.75584	12.5625	1.46181	14.1656	5.99926	1.95129	4.89939	1.31563
		Blistering feces	25.6689	6.66585	4.81703	12.7242	1.46181	15.8131	5.99926	2.43911	6.05911	1.31563
		floor-rise farming	25.2765	6.66585	4.2818	12.8671	1.46181	14.8716	5.99926	1.97577	5.58095	1.31563
		manual dry cleaning manure	25.8334	6.66585	5.28426	12.4214	1.46181	12.4838	5.99926	1.48182	3.7602	1.24254
		mechanical dry clearing manure	25.6689	6.66585	4.81703	12.7242	1.46181	12.7841	5.99926	1.7288	3.74042	1.31563
		Water flushing feces	25.6689	6.66585	4.81703	12.7242	1.46181	14.778	5.99926	1.95129	5.51181	1.31563
	layer
		bedding / litter	0.288177	0.15774	0.012731	0.117706	0	0.169745	0.141966	0.00417067	0.0236084	0
		Blistering feces	0.292977	0.15774	0.0131995	0.122037	0	0.170401	0.141966	0.00486578	0.023569	0
		floor-rise farming	0.291925	0.15774	0.0117329	0.122452	0	0.169745	0.141966	0.00417067	0.0236084	0
		manual dry cleaning manure	0.289191	0.15774	0.0141456	0.117306	0	0.167082	0.138811	0.00483781	0.0234335	0
		mechanical dry clearing manure	0.292977	0.15774	0.0131995	0.122037	0	0.161199	0.134079	0.0040717	0.0230481	0
		Water flushing feces	0.292977	0.15774	0.0131995	0.122037	0	0.170213	0.141966	0.00424094	0.0240061	0
	pig
		bedding / litter	1.50769	0.550965	0.450194	0.506531	0	0.951431	0.495869	0.188091	0.267471	0
		Blistering feces	1.52898	0.550965	0.460211	0.517801	0	0.992576	0.495869	0.235114	0.261593	0
		floor-rise farming	1.49063	0.550965	0.409076	0.530584	0	0.961135	0.495869	0.192098	0.273169	0
		manual dry cleaning manure	1.54521	0.550965	0.500216	0.494025	0	0.851868	0.495869	0.192098	0.163901	0
		mechanical dry clearing manure	1.52898	0.550965	0.460211	0.517801	0	0.906501	0.495869	0.192098	0.218535	0
		Water flushing feces	1.52898	0.550965	0.460211	0.517801	0	0.951431	0.495869	0.188091	0.267471	0
Shandong
	beef cattle
		bedding / litter	15.2634	3.53468	3.02071	7.97919	0.728799	8.17036	3.18121	1.23424	3.09899	0.655919
		Blistering feces	15.3815	3.53468	3.05315	8.0649	0.728799	9.21248	3.18121	1.5428	3.83255	0.655919
		floor-rise farming	15.1329	3.53468	2.71392	8.15547	0.728799	8.60738	3.18121	1.24722	3.52303	0.655919
		manual dry cleaning manure	15.5094	3.53468	3.35634	7.88957	0.728799	7.10976	3.18121	0.935415	2.37366	0.61948
		mechanical dry clearing manure	15.3815	3.53468	3.05315	8.0649	0.728799	7.28962	3.18121	1.09132	2.36117	0.655919
		Water flushing feces	15.3815	3.53468	3.05315	8.0649	0.728799	8.55773	3.18121	1.23424	3.48636	0.655919
	broiler
		bedding / litter	0.0479828	0.0247102	0.00440686	0.0188658	0	0.0277219	0.0222391	0.00166889	0.00381384	0
		Blistering feces	0.0487462	0.0247102	0.00455142	0.0194846	0	0.0277219	0.0222391	0.00166889	0.00381384	0
		floor-rise farming	0.048375	0.0247102	0.0040457	0.0196192	0	0.0277219	0.0222391	0.00166889	0.00381384	0
		manual dry cleaning manure	0.0483422	0.0247102	0.00489651	0.0187356	0	0.0271871	0.0217449	0.00165653	0.00378562	0
		mechanical dry clearing manure	0.0487462	0.0247102	0.00455142	0.0194846	0	0.0261191	0.0210036	0.00139196	0.0037235	0
		Water flushing feces	0.0487462	0.0247102	0.00455142	0.0194846	0	0.027805	0.0222391	0.00169418	0.00387165	0
	dairy cattle
		bedding / litter	21.7479	5.69708	4.06466	10.7368	1.24936	12.1068	5.12737	1.6677	4.18734	1.12442
		Blistering feces	21.9383	5.69708	4.11695	10.8749	1.24936	13.5149	5.12737	2.08463	5.17852	1.12442
		floor-rise farming	21.603	5.69708	3.65952	10.9971	1.24936	12.7103	5.12737	1.68862	4.76985	1.12442
		manual dry cleaning manure	22.0789	5.69708	4.51628	10.6162	1.24936	10.6695	5.12737	1.26647	3.21372	1.06196
		mechanical dry clearing manure	21.9383	5.69708	4.11695	10.8749	1.24936	10.9261	5.12737	1.47754	3.19681	1.12442
		Water flushing feces	21.9383	5.69708	4.11695	10.8749	1.24936	12.6303	5.12737	1.6677	4.71076	1.12442
	layer
		bedding / litter	0.301078	0.164801	0.0133009	0.122975	0	0.177344	0.148321	0.00435738	0.0246652	0
		Blistering feces	0.306092	0.164801	0.0137904	0.127501	0	0.178029	0.148321	0.00508361	0.0246241	0
		floor-rise farming	0.304994	0.164801	0.0122581	0.127934	0	0.177344	0.148321	0.00435738	0.0246652	0
		manual dry cleaning manure	0.302137	0.164801	0.0147788	0.122557	0	0.174562	0.145025	0.00505439	0.0244826	0
		mechanical dry clearing manure	0.306092	0.164801	0.0137904	0.127501	0	0.168415	0.140081	0.00425398	0.02408	0
		Water flushing feces	0.306092	0.164801	0.0137904	0.127501	0	0.177833	0.148321	0.00443079	0.0250808	0
	pig
		bedding / litter	2.76469	1.01032	0.825532	0.928837	0	1.74466	0.909286	0.344907	0.490468	0
		Blistering feces	2.80372	1.01032	0.8439	0.949503	0	1.82011	0.909286	0.431134	0.47969	0
		floor-rise farming	2.7334	1.01032	0.750133	0.972945	0	1.76246	0.909286	0.352254	0.500916	0
		manual dry cleaning manure	2.83348	1.01032	0.917258	0.905906	0	1.56209	0.909286	0.352254	0.300549	0
		mechanical dry clearing manure	2.80372	1.01032	0.8439	0.949503	0	1.66227	0.909286	0.352254	0.400732	0
		Water flushing feces	2.80372	1.01032	0.8439	0.949503	0	1.74466	0.909286	0.344907	0.490468	0
Shanghai
	beef cattle
		bedding / litter	15.2634	3.53468	3.02071	7.97919	0.728799	8.17036	3.18121	1.23424	3.09899	0.655919
		Blistering feces	15.3815	3.53468	3.05315	8.0649	0.728799	9.21248	3.18121	1.5428	3.83255	0.655919
		floor-rise farming	15.1329	3.53468	2.71392	8.15547	0.728799	8.60738	3.18121	1.24722	3.52303	0.655919
		manual dry cleaning manure	15.5094	3.53468	3.35634	7.88957	0.728799	7.10976	3.18121	0.935415	2.37366	0.61948
		mechanical dry clearing manure	15.3815	3.53468	3.05315	8.0649	0.728799	7.28962	3.18121	1.09132	2.36117	0.655919
		Water flushing feces	15.3815	3.53468	3.05315	8.0649	0.728799	8.55773	3.18121	1.23424	3.48636	0.655919
	broiler
		bedding / litter	0.0479828	0.0247102	0.00440686	0.0188658	0	0.0277219	0.0222391	0.00166889	0.00381384	0
		Blistering feces	0.0487462	0.0247102	0.00455142	0.0194846	0	0.0277219	0.0222391	0.00166889	0.00381384	0
		floor-rise farming	0.048375	0.0247102	0.0040457	0.0196192	0	0.0277219	0.0222391	0.00166889	0.00381384	0
		manual dry cleaning manure	0.0483422	0.0247102	0.00489651	0.0187356	0	0.0271871	0.0217449	0.00165653	0.00378562	0
		mechanical dry clearing manure	0.0487462	0.0247102	0.00455142	0.0194846	0	0.0261191	0.0210036	0.00139196	0.0037235	0
		Water flushing feces	0.0487462	0.0247102	0.00455142	0.0194846	0	0.027805	0.0222391	0.00169418	0.00387165	0
	dairy cattle
		bedding / litter	21.7479	5.69708	4.06466	10.7368	1.24936	12.1068	5.12737	1.6677	4.18734	1.12442
		Blistering feces	21.9383	5.69708	4.11695	10.8749	1.24936	13.5149	5.12737	2.08463	5.17852	1.12442
		floor-rise farming	21.603	5.69708	3.65952	10.9971	1.24936	12.7103	5.12737	1.68862	4.76985	1.12442
		manual dry cleaning manure	22.0789	5.69708	4.51628	10.6162	1.24936	10.6695	5.12737	1.26647	3.21372	1.06196
		mechanical dry clearing manure	21.9383	5.69708	4.11695	10.8749	1.24936	10.9261	5.12737	1.47754	3.19681	1.12442
		Water flushing feces	21.9383	5.69708	4.11695	10.8749	1.24936	12.6303	5.12737	1.6677	4.71076	1.12442
	layer
		bedding / litter	0.301078	0.164801	0.0133009	0.122975	0	0.177344	0.148321	0.00435738	0.0246652	0
		Blistering feces	0.306092	0.164801	0.0137904	0.127501	0	0.178029	0.148321	0.00508361	0.0246241	0
		floor-rise farming	0.304994	0.164801	0.0122581	0.127934	0	0.177344	0.148321	0.00435738	0.0246652	0
		manual dry cleaning manure	0.302137	0.164801	0.0147788	0.122557	0	0.174562	0.145025	0.00505439	0.0244826	0
		mechanical dry clearing manure	0.306092	0.164801	0.0137904	0.127501	0	0.168415	0.140081	0.00425398	0.02408	0
		Water flushing feces	0.306092	0.164801	0.0137904	0.127501	0	0.177833	0.148321	0.00443079	0.0250808	0
	pig
		bedding / litter	2.76469	1.01032	0.825532	0.928837	0	1.74466	0.909286	0.344907	0.490468	0
		Blistering feces	2.80372	1.01032	0.8439	0.949503	0	1.82011	0.909286	0.431134	0.47969	0
		floor-rise farming	2.7334	1.01032	0.750133	0.972945	0	1.76246	0.909286	0.352254	0.500916	0
		manual dry cleaning manure	2.83348	1.01032	0.917258	0.905906	0	1.56209	0.909286	0.352254	0.300549	0
		mechanical dry clearing manure	2.80372	1.01032	0.8439	0.949503	0	1.66227	0.909286	0.352254	0.400732	0
		Water flushing feces	2.80372	1.01032	0.8439	0.949503	0	1.74466	0.909286	0.344907	0.490468	0
Shanxi
	beef cattle
		bedding / litter	12.527	2.90099	2.47916	6.5487	0.598142	6.7056	2.61089	1.01297	2.54341	0.538328
		Blistering feces	12.624	2.90099	2.50579	6.61904	0.598142	7.56089	2.61089	1.26621	3.14546	0.538328
		floor-rise farming	12.4199	2.90099	2.22737	6.69338	0.598142	7.06427	2.61089	1.02362	2.89143	0.538328
		manual dry cleaning manure	12.7289	2.90099	2.75462	6.47515	0.598142	5.83514	2.61089	0.767716	1.94812	0.508421
		mechanical dry clearing manure	12.624	2.90099	2.50579	6.61904	0.598142	5.98275	2.61089	0.895669	1.93787	0.538328
		Water flushing feces	12.624	2.90099	2.50579	6.61904	0.598142	7.02353	2.61089	1.01297	2.86134	0.538328
	broiler
		bedding / litter	0.0440708	0.0226955	0.00404757	0.0173277	0	0.0254617	0.020426	0.00153282	0.0035029	0
		Blistering feces	0.044772	0.0226955	0.00418034	0.0178961	0	0.0254617	0.020426	0.00153282	0.0035029	0
		floor-rise farming	0.044431	0.0226955	0.00371586	0.0180196	0	0.0254617	0.020426	0.00153282	0.0035029	0
		manual dry cleaning manure	0.0444009	0.0226955	0.0044973	0.0172081	0	0.0249705	0.0199721	0.00152148	0.00347698	0
		mechanical dry clearing manure	0.044772	0.0226955	0.00418034	0.0178961	0	0.0239896	0.0192912	0.00127847	0.00341993	0
		Water flushing feces	0.044772	0.0226955	0.00418034	0.0178961	0	0.0255381	0.020426	0.00155606	0.003556	0
	dairy cattle
		bedding / litter	26.8554	7.03504	5.01924	13.2583	1.54277	14.9501	6.33154	2.05936	5.17074	1.3885
		Blistering feces	27.0905	7.03504	5.08382	13.4289	1.54277	16.6889	6.33154	2.5742	6.3947	1.3885
		floor-rise farming	26.6765	7.03504	4.51896	13.5797	1.54277	15.6953	6.33154	2.0852	5.89006	1.3885
		manual dry cleaning manure	27.2642	7.03504	5.57694	13.1094	1.54277	13.1753	6.33154	1.5639	3.96846	1.31136
		mechanical dry clearing manure	27.0905	7.03504	5.08382	13.4289	1.54277	13.4922	6.33154	1.82455	3.94758	1.3885
		Water flushing feces	27.0905	7.03504	5.08382	13.4289	1.54277	15.5965	6.33154	2.05936	5.81709	1.3885
	layer
		bedding / litter	0.277385	0.151832	0.0122542	0.113298	0	0.163388	0.136649	0.00401448	0.0227242	0
		Blistering feces	0.282005	0.151832	0.0127052	0.117467	0	0.164019	0.136649	0.00468356	0.0226864	0
		floor-rise farming	0.280993	0.151832	0.0112935	0.117867	0	0.163388	0.136649	0.00401448	0.0227242	0
		manual dry cleaning manure	0.278361	0.151832	0.0136158	0.112913	0	0.160825	0.133613	0.00465664	0.022556	0
		mechanical dry clearing manure	0.282005	0.151832	0.0127052	0.117467	0	0.155162	0.129058	0.00391922	0.022185	0
		Water flushing feces	0.282005	0.151832	0.0127052	0.117467	0	0.163838	0.136649	0.00408212	0.0231071	0
	pig
		bedding / litter	1.91446	0.699613	0.571654	0.64319	0	1.20812	0.629651	0.238837	0.339633	0
		Blistering feces	1.94149	0.699613	0.584373	0.6575	0	1.26037	0.629651	0.298546	0.332169	0
		floor-rise farming	1.89279	0.699613	0.519443	0.673733	0	1.22044	0.629651	0.243924	0.346868	0
		manual dry cleaning manure	1.96209	0.699613	0.635171	0.62731	0	1.0817	0.629651	0.243924	0.208121	0
		mechanical dry clearing manure	1.94149	0.699613	0.584373	0.6575	0	1.15107	0.629651	0.243924	0.277494	0
		Water flushing feces	1.94149	0.699613	0.584373	0.6575	0	1.20812	0.629651	0.238837	0.339633	0
Sichuan
	beef cattle
		bedding / litter	17.2459	3.9938	3.41307	9.01561	0.823464	9.23162	3.59442	1.39456	3.50152	0.741117
		Blistering feces	17.3794	3.9938	3.44973	9.11245	0.823464	10.4091	3.59442	1.7432	4.33036	0.741117
		floor-rise farming	17.0985	3.9938	3.06643	9.2148	0.823464	9.7254	3.59442	1.40922	3.98064	0.741117
		manual dry cleaning manure	17.5239	3.9938	3.7923	8.91435	0.823464	8.03326	3.59442	1.05692	2.68198	0.699944
		mechanical dry clearing manure	17.3794	3.9938	3.44973	9.11245	0.823464	8.23647	3.59442	1.23307	2.66787	0.741117
		Water flushing feces	17.3794	3.9938	3.44973	9.11245	0.823464	9.66931	3.59442	1.39456	3.93921	0.741117
	broiler
		bedding / litter	0.045574	0.0234697	0.00418563	0.0179187	0	0.0263302	0.0211227	0.00158511	0.00362238	0
		Blistering feces	0.0462991	0.0234697	0.00432293	0.0185065	0	0.0263302	0.0211227	0.00158511	0.00362238	0
		floor-rise farming	0.0459465	0.0234697	0.0038426	0.0186342	0	0.0263302	0.0211227	0.00158511	0.00362238	0
		manual dry cleaning manure	0.0459154	0.0234697	0.0046507	0.017795	0	0.0258222	0.0206533	0.00157337	0.00359557	0
		mechanical dry clearing manure	0.0462991	0.0234697	0.00432293	0.0185065	0	0.0248079	0.0199492	0.00132208	0.00353657	0
		Water flushing feces	0.0462991	0.0234697	0.00432293	0.0185065	0	0.0264091	0.0211227	0.00160913	0.00367729	0
	dairy cattle
		bedding / litter	20.5515	5.38367	3.84105	10.1461	1.18063	11.4408	4.84531	1.57596	3.95699	1.06257
		Blistering feces	20.7315	5.38367	3.89048	10.2767	1.18063	12.7715	4.84531	1.96995	4.89364	1.06257
		floor-rise farming	20.4146	5.38367	3.4582	10.3921	1.18063	12.0111	4.84531	1.59573	4.50746	1.06257
		manual dry cleaning manure	20.8643	5.38367	4.26784	10.0322	1.18063	10.0826	4.84531	1.1968	3.03693	1.00354
		mechanical dry clearing manure	20.7315	5.38367	3.89048	10.2767	1.18063	10.3251	4.84531	1.39626	3.02095	1.06257
		Water flushing feces	20.7315	5.38367	3.89048	10.2767	1.18063	11.9355	4.84531	1.57596	4.45162	1.06257
	layer
		bedding / litter	0.260654	0.142675	0.0115151	0.106464	0	0.153533	0.128407	0.00377234	0.0213536	0
		Blistering feces	0.264996	0.142675	0.0119389	0.110382	0	0.154126	0.128407	0.00440107	0.021318	0
		floor-rise farming	0.264045	0.142675	0.0106123	0.110758	0	0.153533	0.128407	0.00377234	0.0213536	0
		manual dry cleaning manure	0.261572	0.142675	0.0127946	0.106102	0	0.151125	0.125554	0.00437577	0.0211955	0
		mechanical dry clearing manure	0.264996	0.142675	0.0119389	0.110382	0	0.145803	0.121273	0.00368283	0.0208469	0
		Water flushing feces	0.264996	0.142675	0.0119389	0.110382	0	0.153957	0.128407	0.0038359	0.0217134	0
	pig
		bedding / litter	2.29857	0.839984	0.686351	0.77224	0	1.45052	0.755985	0.286757	0.407777	0
		Blistering feces	2.33103	0.839984	0.701622	0.789422	0	1.51325	0.755985	0.358447	0.398816	0
		floor-rise farming	2.27256	0.839984	0.623664	0.808911	0	1.46531	0.755985	0.292866	0.416464	0
		manual dry cleaning manure	2.35577	0.839984	0.762613	0.753174	0	1.29873	0.755985	0.292866	0.249878	0
		mechanical dry clearing manure	2.33103	0.839984	0.701622	0.789422	0	1.38202	0.755985	0.292866	0.333171	0
		Water flushing feces	2.33103	0.839984	0.701622	0.789422	0	1.45052	0.755985	0.286757	0.407777	0
Tianjin
	beef cattle
		bedding / litter	11.2714	2.61021	2.23067	5.8923	0.538188	6.03347	2.34919	0.911436	2.28848	0.484369
		Blistering feces	11.3586	2.61021	2.25463	5.95559	0.538188	6.80303	2.34919	1.13929	2.83018	0.484369
		floor-rise farming	11.175	2.61021	2.00411	6.02248	0.538188	6.35619	2.34919	0.921021	2.60161	0.484369
		manual dry cleaning manure	11.453	2.61021	2.47852	5.82612	0.538188	5.25027	2.34919	0.690765	1.75285	0.45746
		mechanical dry clearing manure	11.3586	2.61021	2.25463	5.95559	0.538188	5.38308	2.34919	0.805893	1.74363	0.484369
		Water flushing feces	11.3586	2.61021	2.25463	5.95559	0.538188	6.31953	2.34919	0.911436	2.57454	0.484369
	broiler
		bedding / litter	0.0529543	0.0272704	0.00486346	0.0208205	0	0.0305941	0.0245433	0.0018418	0.00420899	0
		Blistering feces	0.0537968	0.0272704	0.00502299	0.0215035	0	0.0305941	0.0245433	0.0018418	0.00420899	0
		floor-rise farming	0.0533872	0.0272704	0.00446488	0.0216519	0	0.0305941	0.0245433	0.0018418	0.00420899	0
		manual dry cleaning manure	0.053351	0.0272704	0.00540384	0.0206768	0	0.0300039	0.0239979	0.00182817	0.00417784	0
		mechanical dry clearing manure	0.0537968	0.0272704	0.00502299	0.0215035	0	0.0288253	0.0231798	0.00153618	0.00410929	0
		Water flushing feces	0.0537968	0.0272704	0.00502299	0.0215035	0	0.0306859	0.0245433	0.00186972	0.00427279	0
	dairy cattle
		bedding / litter	25.446	6.66585	4.75584	12.5625	1.46181	14.1656	5.99926	1.95129	4.89939	1.31563
		Blistering feces	25.6689	6.66585	4.81703	12.7242	1.46181	15.8131	5.99926	2.43911	6.05911	1.31563
		floor-rise farming	25.2765	6.66585	4.2818	12.8671	1.46181	14.8716	5.99926	1.97577	5.58095	1.31563
		manual dry cleaning manure	25.8334	6.66585	5.28426	12.4214	1.46181	12.4838	5.99926	1.48182	3.7602	1.24254
		mechanical dry clearing manure	25.6689	6.66585	4.81703	12.7242	1.46181	12.7841	5.99926	1.7288	3.74042	1.31563
		Water flushing feces	25.6689	6.66585	4.81703	12.7242	1.46181	14.778	5.99926	1.95129	5.51181	1.31563
	layer
		bedding / litter	0.288177	0.15774	0.012731	0.117706	0	0.169745	0.141966	0.00417067	0.0236084	0
		Blistering feces	0.292977	0.15774	0.0131995	0.122037	0	0.170401	0.141966	0.00486578	0.023569	0
		floor-rise farming	0.291925	0.15774	0.0117329	0.122452	0	0.169745	0.141966	0.00417067	0.0236084	0
		manual dry cleaning manure	0.289191	0.15774	0.0141456	0.117306	0	0.167082	0.138811	0.00483781	0.0234335	0
		mechanical dry clearing manure	0.292977	0.15774	0.0131995	0.122037	0	0.161199	0.134079	0.0040717	0.0230481	0
		Water flushing feces	0.292977	0.15774	0.0131995	0.122037	0	0.170213	0.141966	0.00424094	0.0240061	0
	pig
		bedding / litter	1.50769	0.550965	0.450194	0.506531	0	0.951431	0.495869	0.188091	0.267471	0
		Blistering feces	1.52898	0.550965	0.460211	0.517801	0	0.992576	0.495869	0.235114	0.261593	0
		floor-rise farming	1.49063	0.550965	0.409076	0.530584	0	0.961135	0.495869	0.192098	0.273169	0
		manual dry cleaning manure	1.54521	0.550965	0.500216	0.494025	0	0.851868	0.495869	0.192098	0.163901	0
		mechanical dry clearing manure	1.52898	0.550965	0.460211	0.517801	0	0.906501	0.495869	0.192098	0.218535	0
		Water flushing feces	1.52898	0.550965	0.460211	0.517801	0	0.951431	0.495869	0.188091	0.267471	0
Tibet
	beef cattle
		bedding / litter	17.2459	3.9938	3.41307	9.01561	0.823464	9.23162	3.59442	1.39456	3.50152	0.741117
		Blistering feces	17.3794	3.9938	3.44973	9.11245	0.823464	10.4091	3.59442	1.7432	4.33036	0.741117
		floor-rise farming	17.0985	3.9938	3.06643	9.2148	0.823464	9.7254	3.59442	1.40922	3.98064	0.741117
		manual dry cleaning manure	17.5239	3.9938	3.7923	8.91435	0.823464	8.03326	3.59442	1.05692	2.68198	0.699944
		mechanical dry clearing manure	17.3794	3.9938	3.44973	9.11245	0.823464	8.23647	3.59442	1.23307	2.66787	0.741117
		Water flushing feces	17.3794	3.9938	3.44973	9.11245	0.823464	9.66931	3.59442	1.39456	3.93921	0.741117
	broiler
		bedding / litter	0.045574	0.0234697	0.00418563	0.0179187	0	0.0263302	0.0211227	0.00158511	0.00362238	0
		Blistering feces	0.0462991	0.0234697	0.00432293	0.0185065	0	0.0263302	0.0211227	0.00158511	0.00362238	0
		floor-rise farming	0.0459465	0.0234697	0.0038426	0.0186342	0	0.0263302	0.0211227	0.00158511	0.00362238	0
		manual dry cleaning manure	0.0459154	0.0234697	0.0046507	0.017795	0	0.0258222	0.0206533	0.00157337	0.00359557	0
		mechanical dry clearing manure	0.0462991	0.0234697	0.00432293	0.0185065	0	0.0248079	0.0199492	0.00132208	0.00353657	0
		Water flushing feces	0.0462991	0.0234697	0.00432293	0.0185065	0	0.0264091	0.0211227	0.00160913	0.00367729	0
	dairy cattle
		bedding / litter	20.5515	5.38367	3.84105	10.1461	1.18063	11.4408	4.84531	1.57596	3.95699	1.06257
		Blistering feces	20.7315	5.38367	3.89048	10.2767	1.18063	12.7715	4.84531	1.96995	4.89364	1.06257
		floor-rise farming	20.4146	5.38367	3.4582	10.3921	1.18063	12.0111	4.84531	1.59573	4.50746	1.06257
		manual dry cleaning manure	20.8643	5.38367	4.26784	10.0322	1.18063	10.0826	4.84531	1.1968	3.03693	1.00354
		mechanical dry clearing manure	20.7315	5.38367	3.89048	10.2767	1.18063	10.3251	4.84531	1.39626	3.02095	1.06257
		Water flushing feces	20.7315	5.38367	3.89048	10.2767	1.18063	11.9355	4.84531	1.57596	4.45162	1.06257
	layer
		bedding / litter	0.260654	0.142675	0.0115151	0.106464	0	0.153533	0.128407	0.00377234	0.0213536	0
		Blistering feces	0.264996	0.142675	0.0119389	0.110382	0	0.154126	0.128407	0.00440107	0.021318	0
		floor-rise farming	0.264045	0.142675	0.0106123	0.110758	0	0.153533	0.128407	0.00377234	0.0213536	0
		manual dry cleaning manure	0.261572	0.142675	0.0127946	0.106102	0	0.151125	0.125554	0.00437577	0.0211955	0
		mechanical dry clearing manure	0.264996	0.142675	0.0119389	0.110382	0	0.145803	0.121273	0.00368283	0.0208469	0
		Water flushing feces	0.264996	0.142675	0.0119389	0.110382	0	0.153957	0.128407	0.0038359	0.0217134	0
	pig
		bedding / litter	2.29857	0.839984	0.686351	0.77224	0	1.45052	0.755985	0.286757	0.407777	0
		Blistering feces	2.33103	0.839984	0.701622	0.789422	0	1.51325	0.755985	0.358447	0.398816	0
		floor-rise farming	2.27256	0.839984	0.623664	0.808911	0	1.46531	0.755985	0.292866	0.416464	0
		manual dry cleaning manure	2.35577	0.839984	0.762613	0.753174	0	1.29873	0.755985	0.292866	0.249878	0
		mechanical dry clearing manure	2.33103	0.839984	0.701622	0.789422	0	1.38202	0.755985	0.292866	0.333171	0
		Water flushing feces	2.33103	0.839984	0.701622	0.789422	0	1.45052	0.755985	0.286757	0.407777	0
Xinjiang
	beef cattle
		bedding / litter	12.527	2.90099	2.47916	6.5487	0.598142	6.7056	2.61089	1.01297	2.54341	0.538328
		Blistering feces	12.624	2.90099	2.50579	6.61904	0.598142	7.56089	2.61089	1.26621	3.14546	0.538328
		floor-rise farming	12.4199	2.90099	2.22737	6.69338	0.598142	7.06427	2.61089	1.02362	2.89143	0.538328
		manual dry cleaning manure	12.7289	2.90099	2.75462	6.47515	0.598142	5.83514	2.61089	0.767716	1.94812	0.508421
		mechanical dry clearing manure	12.624	2.90099	2.50579	6.61904	0.598142	5.98275	2.61089	0.895669	1.93787	0.538328
		Water flushing feces	12.624	2.90099	2.50579	6.61904	0.598142	7.02353	2.61089	1.01297	2.86134	0.538328
	broiler
		bedding / litter	0.0440708	0.0226955	0.00404757	0.0173277	0	0.0254617	0.020426	0.00153282	0.0035029	0
		Blistering feces	0.044772	0.0226955	0.00418034	0.0178961	0	0.0254617	0.020426	0.00153282	0.0035029	0
		floor-rise farming	0.044431	0.0226955	0.00371586	0.0180196	0	0.0254617	0.020426	0.00153282	0.0035029	0
		manual dry cleaning manure	0.0444009	0.0226955	0.0044973	0.0172081	0	0.0249705	0.0199721	0.00152148	0.00347698	0
		mechanical dry clearing manure	0.044772	0.0226955	0.00418034	0.0178961	0	0.0239896	0.0192912	0.00127847	0.00341993	0
		Water flushing feces	0.044772	0.0226955	0.00418034	0.0178961	0	0.0255381	0.020426	0.00155606	0.003556	0
	dairy cattle
		bedding / litter	26.8554	7.03504	5.01924	13.2583	1.54277	14.9501	6.33154	2.05936	5.17074	1.3885
		Blistering feces	27.0905	7.03504	5.08382	13.4289	1.54277	16.6889	6.33154	2.5742	6.3947	1.3885
		floor-rise farming	26.6765	7.03504	4.51896	13.5797	1.54277	15.6953	6.33154	2.0852	5.89006	1.3885
		manual dry cleaning manure	27.2642	7.03504	5.57694	13.1094	1.54277	13.1753	6.33154	1.5639	3.96846	1.31136
		mechanical dry clearing manure	27.0905	7.03504	5.08382	13.4289	1.54277	13.4922	6.33154	1.82455	3.94758	1.3885
		Water flushing feces	27.0905	7.03504	5.08382	13.4289	1.54277	15.5965	6.33154	2.05936	5.81709	1.3885
	layer
		bedding / litter	0.277385	0.151832	0.0122542	0.113298	0	0.163388	0.136649	0.00401448	0.0227242	0
		Blistering feces	0.282005	0.151832	0.0127052	0.117467	0	0.164019	0.136649	0.00468356	0.0226864	0
		floor-rise farming	0.280993	0.151832	0.0112935	0.117867	0	0.163388	0.136649	0.00401448	0.0227242	0
		manual dry cleaning manure	0.278361	0.151832	0.0136158	0.112913	0	0.160825	0.133613	0.00465664	0.022556	0
		mechanical dry clearing manure	0.282005	0.151832	0.0127052	0.117467	0	0.155162	0.129058	0.00391922	0.022185	0
		Water flushing feces	0.282005	0.151832	0.0127052	0.117467	0	0.163838	0.136649	0.00408212	0.0231071	0
	pig
		bedding / litter	1.91446	0.699613	0.571654	0.64319	0	1.20812	0.629651	0.238837	0.339633	0
		Blistering feces	1.94149	0.699613	0.584373	0.6575	0	1.26037	0.629651	0.298546	0.332169	0
		floor-rise farming	1.89279	0.699613	0.519443	0.673733	0	1.22044	0.629651	0.243924	0.346868	0
		manual dry cleaning manure	1.96209	0.699613	0.635171	0.62731	0	1.0817	0.629651	0.243924	0.208121	0
		mechanical dry clearing manure	1.94149	0.699613	0.584373	0.6575	0	1.15107	0.629651	0.243924	0.277494	0
		Water flushing feces	1.94149	0.699613	0.584373	0.6575	0	1.20812	0.629651	0.238837	0.339633	0
Yunnan
	beef cattle
		bedding / litter	17.2459	3.9938	3.41307	9.01561	0.823464	9.23162	3.59442	1.39456	3.50152	0.741117
		Blistering feces	17.3794	3.9938	3.44973	9.11245	0.823464	10.4091	3.59442	1.7432	4.33036	0.741117
		floor-rise farming	17.0985	3.9938	3.06643	9.2148	0.823464	9.7254	3.59442	1.40922	3.98064	0.741117
		manual dry cleaning manure	17.5239	3.9938	3.7923	8.91435	0.823464	8.03326	3.59442	1.05692	2.68198	0.699944
		mechanical dry clearing manure	17.3794	3.9938	3.44973	9.11245	0.823464	8.23647	3.59442	1.23307	2.66787	0.741117
		Water flushing feces	17.3794	3.9938	3.44973	9.11245	0.823464	9.66931	3.59442	1.39456	3.93921	0.741117
	broiler
		bedding / litter	0.045574	0.0234697	0.00418563	0.0179187	0	0.0263302	0.0211227	0.00158511	0.00362238	0
		Blistering feces	0.0462991	0.0234697	0.00432293	0.0185065	0	0.0263302	0.0211227	0.00158511	0.00362238	0
		floor-rise farming	0.0459465	0.0234697	0.0038426	0.0186342	0	0.0263302	0.0211227	0.00158511	0.00362238	0
		manual dry cleaning manure	0.0459154	0.0234697	0.0046507	0.017795	0	0.0258222	0.0206533	0.00157337	0.00359557	0
		mechanical dry clearing manure	0.0462991	0.0234697	0.00432293	0.0185065	0	0.0248079	0.0199492	0.00132208	0.00353657	0
		Water flushing feces	0.0462991	0.0234697	0.00432293	0.0185065	0	0.0264091	0.0211227	0.00160913	0.00367729	0
	dairy cattle
		bedding / litter	20.5515	5.38367	3.84105	10.1461	1.18063	11.4408	4.84531	1.57596	3.95699	1.06257
		Blistering feces	20.7315	5.38367	3.89048	10.2767	1.18063	12.7715	4.84531	1.96995	4.89364	1.06257
		floor-rise farming	20.4146	5.38367	3.4582	10.3921	1.18063	12.0111	4.84531	1.59573	4.50746	1.06257
		manual dry cleaning manure	20.8643	5.38367	4.26784	10.0322	1.18063	10.0826	4.84531	1.1968	3.03693	1.00354
		mechanical dry clearing manure	20.7315	5.38367	3.89048	10.2767	1.18063	10.3251	4.84531	1.39626	3.02095	1.06257
		Water flushing feces	20.7315	5.38367	3.89048	10.2767	1.18063	11.9355	4.84531	1.57596	4.45162	1.06257
	layer
		bedding / litter	0.260654	0.142675	0.0115151	0.106464	0	0.153533	0.128407	0.00377234	0.0213536	0
		Blistering feces	0.264996	0.142675	0.0119389	0.110382	0	0.154126	0.128407	0.00440107	0.021318	0
		floor-rise farming	0.264045	0.142675	0.0106123	0.110758	0	0.153533	0.128407	0.00377234	0.0213536	0
		manual dry cleaning manure	0.261572	0.142675	0.0127946	0.106102	0	0.151125	0.125554	0.00437577	0.0211955	0
		mechanical dry clearing manure	0.264996	0.142675	0.0119389	0.110382	0	0.145803	0.121273	0.00368283	0.0208469	0
		Water flushing feces	0.264996	0.142675	0.0119389	0.110382	0	0.153957	0.128407	0.0038359	0.0217134	0
	pig
		bedding / litter	2.29857	0.839984	0.686351	0.77224	0	1.45052	0.755985	0.286757	0.407777	0
		Blistering feces	2.33103	0.839984	0.701622	0.789422	0	1.51325	0.755985	0.358447	0.398816	0
		floor-rise farming	2.27256	0.839984	0.623664	0.808911	0	1.46531	0.755985	0.292866	0.416464	0
		manual dry cleaning manure	2.35577	0.839984	0.762613	0.753174	0	1.29873	0.755985	0.292866	0.249878	0
		mechanical dry clearing manure	2.33103	0.839984	0.701622	0.789422	0	1.38202	0.755985	0.292866	0.333171	0
		Water flushing feces	2.33103	0.839984	0.701622	0.789422	0	1.45052	0.755985	0.286757	0.407777	0
Zhejiang
	beef cattle
		bedding / litter	15.2634	3.53468	3.02071	7.97919	0.728799	8.17036	3.18121	1.23424	3.09899	0.655919
		Blistering feces	15.3815	3.53468	3.05315	8.0649	0.728799	9.21248	3.18121	1.5428	3.83255	0.655919
		floor-rise farming	15.1329	3.53468	2.71392	8.15547	0.728799	8.60738	3.18121	1.24722	3.52303	0.655919
		manual dry cleaning manure	15.5094	3.53468	3.35634	7.88957	0.728799	7.10976	3.18121	0.935415	2.37366	0.61948
		mechanical dry clearing manure	15.3815	3.53468	3.05315	8.0649	0.728799	7.28962	3.18121	1.09132	2.36117	0.655919
		Water flushing feces	15.3815	3.53468	3.05315	8.0649	0.728799	8.55773	3.18121	1.23424	3.48636	0.655919
	broiler
		bedding / litter	0.0479828	0.0247102	0.00440686	0.0188658	0	0.0277219	0.0222391	0.00166889	0.00381384	0
		Blistering feces	0.0487462	0.0247102	0.00455142	0.0194846	0	0.0277219	0.0222391	0.00166889	0.00381384	0
		floor-rise farming	0.048375	0.0247102	0.0040457	0.0196192	0	0.0277219	0.0222391	0.00166889	0.00381384	0
		manual dry cleaning manure	0.0483422	0.0247102	0.00489651	0.0187356	0	0.0271871	0.0217449	0.00165653	0.00378562	0
		mechanical dry clearing manure	0.0487462	0.0247102	0.00455142	0.0194846	0	0.0261191	0.0210036	0.00139196	0.0037235	0
		Water flushing feces	0.0487462	0.0247102	0.00455142	0.0194846	0	0.027805	0.0222391	0.00169418	0.00387165	0
	dairy cattle
		bedding / litter	21.7479	5.69708	4.06466	10.7368	1.24936	12.1068	5.12737	1.6677	4.18734	1.12442
		Blistering feces	21.9383	5.69708	4.11695	10.8749	1.24936	13.5149	5.12737	2.08463	5.17852	1.12442
		floor-rise farming	21.603	5.69708	3.65952	10.9971	1.24936	12.7103	5.12737	1.68862	4.76985	1.12442
		manual dry cleaning manure	22.0789	5.69708	4.51628	10.6162	1.24936	10.6695	5.12737	1.26647	3.21372	1.06196
		mechanical dry clearing manure	21.9383	5.69708	4.11695	10.8749	1.24936	10.9261	5.12737	1.47754	3.19681	1.12442
		Water flushing feces	21.9383	5.69708	4.11695	10.8749	1.24936	12.6303	5.12737	1.6677	4.71076	1.12442
	layer
		bedding / litter	0.301078	0.164801	0.0133009	0.122975	0	0.177344	0.148321	0.00435738	0.0246652	0
		Blistering feces	0.306092	0.164801	0.0137904	0.127501	0	0.178029	0.148321	0.00508361	0.0246241	0
		floor-rise farming	0.304994	0.164801	0.0122581	0.127934	0	0.177344	0.148321	0.00435738	0.0246652	0
		manual dry cleaning manure	0.302137	0.164801	0.0147788	0.122557	0	0.174562	0.145025	0.00505439	0.0244826	0
		mechanical dry clearing manure	0.306092	0.164801	0.0137904	0.127501	0	0.168415	0.140081	0.00425398	0.02408	0
		Water flushing feces	0.306092	0.164801	0.0137904	0.127501	0	0.177833	0.148321	0.00443079	0.0250808	0
	pig
		bedding / litter	2.76469	1.01032	0.825532	0.928837	0	1.74466	0.909286	0.344907	0.490468	0
		Blistering feces	2.80372	1.01032	0.8439	0.949503	0	1.82011	0.909286	0.431134	0.47969	0
		floor-rise farming	2.7334	1.01032	0.750133	0.972945	0	1.76246	0.909286	0.352254	0.500916	0
		manual dry cleaning manure	2.83348	1.01032	0.917258	0.905906	0	1.56209	0.909286	0.352254	0.300549	0
		mechanical dry clearing manure	2.80372	1.01032	0.8439	0.949503	0	1.66227	0.909286	0.352254	0.400732	0
		Water flushing feces	2.80372	1.01032	0.8439	0.949503	0	1.74466	0.909286	0.344907	0.490468	0

## Sheet: smallholder farming
Smallholder farming animal NH3 EFs by stage under current and abated scenario
			Four Stage	Indoor/Housing	Storage	Application	Outdoor/Grazing	Four Stage	Indoor/Housing	Storage	Application	Outdoor/Grazing
region	animal type	manure treatment mode	total NH3 EF_current	EF_1_current	EF_2_current	EF_3_current	EF_4_current	total NH3 EF _abated scenario	EF_1_abated scenario	EF_2_abated scenario	EF_3_abated scenario	EF_4_abated scenario
Anhui
	beef cattle
		bedding / litter	10.9061	2.20917	1.88794	4.98699	1.822	6.84457	2.03244	0.788543	2.47489	1.5487
		Blistering feces	10.98	2.20917	1.90822	5.04056	1.822	7.14293	2.03244	0.985679	2.44857	1.67624
		floor-rise farming	10.8245	2.20917	1.6962	5.09717	1.822	6.87889	2.03244	0.796835	2.50091	1.5487
		manual dry cleaning manure	11.0599	2.20917	2.09771	4.93098	1.822	5.55658	2.03244	0.990861	0.984578	1.5487
		mechanical dry clearing manure	10.98	2.20917	1.90822	5.04056	1.822	6.87889	2.03244	0.796835	2.50091	1.5487
		Water flushing feces	10.98	2.20917	1.90822	5.04056	1.822	6.97211	2.03244	0.788543	2.47489	1.67624
	broiler
		bedding / litter	0.0237709	0.0107215	0.00191209	0.00818566	0.00295166	0.0138913	0.00911324	0.0005773	0.00154428	0.00265649
		Blistering feces	0.0241021	0.0107215	0.00197481	0.00845417	0.00295166	0.01487	0.00911324	0.000962166	0.00228571	0.00250891
		floor-rise farming	0.023941	0.0107215	0.00175539	0.00851254	0.00295166	0.0149351	0.00911324	0.000793428	0.0023719	0.00265649
		manual dry cleaning manure	0.0239268	0.0107215	0.00212454	0.00812915	0.00295166	0.0141444	0.00911324	0.000793428	0.00158126	0.00265649
		mechanical dry clearing manure	0.0232567	0.0107215	0.00197481	0.00760875	0.00295166	0.0155781	0.00911324	0.000793428	0.00316253	0.00250891
		Water flushing feces	0.0241021	0.0107215	0.00197481	0.00845417	0.00295166	0.0146929	0.00911324	0.000769733	0.00230106	0.00250891
	dairy cattle
		bedding / litter	18.4839	4.13023	2.94676	7.78387	3.62301	11.9942	3.79981	1.23591	3.87896	3.07956
		Blistering feces	18.6219	4.13023	2.98468	7.88402	3.62301	12.5156	3.79981	1.54488	3.83771	3.33317
		floor-rise farming	18.3789	4.13023	2.65305	7.97257	3.62301	12.0584	3.79981	1.25141	3.92762	3.07956
		manual dry cleaning manure	18.7239	4.13023	3.27418	7.69645	3.62301	10.465	3.79981	1.24366	2.34198	3.07956
		mechanical dry clearing manure	18.6219	4.13023	2.98468	7.88402	3.62301	12.0584	3.79981	1.25141	3.92762	3.07956
		Water flushing feces	18.6219	4.13023	2.98468	7.88402	3.62301	12.2478	3.79981	1.23591	3.87896	3.33317
	layer
		bedding / litter	0.122286	0.0587996	0.00474566	0.0438765	0.0148638	0.0757578	0.0517437	0.00159696	0.00903973	0.0133775
		Blistering feces	0.124075	0.0587996	0.00492029	0.0454911	0.0148638	0.0809547	0.0517437	0.00266161	0.0134692	0.0130802
		floor-rise farming	0.123683	0.0587996	0.00437359	0.0456459	0.0148638	0.0807648	0.0517437	0.00212929	0.0135144	0.0133775
		manual dry cleaning manure	0.122664	0.0587996	0.00527295	0.0437273	0.0148638	0.0784675	0.0499797	0.0020567	0.0130537	0.0133775
		mechanical dry clearing manure	0.119526	0.0587996	0.00492029	0.040942	0.0148638	0.0822293	0.0499797	0.001592	0.0180233	0.0126343
		Water flushing feces	0.124075	0.0587996	0.00492029	0.0454911	0.0148638	0.0804676	0.0517437	0.00212929	0.0135144	0.0130802
	pig
		bedding / litter	1.56881	0.564486	0.461242	0.51896	0.0241233	0.996489	0.508037	0.192707	0.274035	0.021711
		Blistering feces	1.59062	0.564486	0.471504	0.530507	0.0241233	1.03864	0.508037	0.240883	0.268012	0.021711
		floor-rise farming	1.55133	0.564486	0.419115	0.543604	0.0241233	1.00643	0.508037	0.196812	0.279872	0.021711
		manual dry cleaning manure	1.60725	0.564486	0.512491	0.506148	0.0241233	0.893277	0.508037	0.196812	0.167923	0.0205048
		mechanical dry clearing manure	1.59062	0.564486	0.471504	0.530507	0.0241233	1.00643	0.508037	0.196812	0.279872	0.021711
		Water flushing feces	1.59062	0.564486	0.471504	0.530507	0.0241233	0.996489	0.508037	0.192707	0.274035	0.021711
Beijing
	beef cattle
		bedding / litter	8.05371	1.63138	1.39417	3.68269	1.34547	5.05443	1.50087	0.582306	1.8276	1.14365
		Blistering feces	8.10824	1.63138	1.40914	3.72225	1.34547	5.27476	1.50087	0.727883	1.80817	1.23783
		floor-rise farming	7.99347	1.63138	1.25257	3.76405	1.34547	5.07977	1.50087	0.58843	1.84682	1.14365
		manual dry cleaning manure	8.16725	1.63138	1.54907	3.64133	1.34547	4.1033	1.50087	0.73171	0.72707	1.14365
		mechanical dry clearing manure	8.10824	1.63138	1.40914	3.72225	1.34547	5.07977	1.50087	0.58843	1.84682	1.14365
		Water flushing feces	8.10824	1.63138	1.40914	3.72225	1.34547	5.14861	1.50087	0.582306	1.8276	1.23783
	broiler
		bedding / litter	0.0172536	0.00778197	0.00138785	0.00594141	0.0021424	0.0100827	0.00661467	0.000419022	0.00112089	0.00192816
		Blistering feces	0.017494	0.00778197	0.00143338	0.0061363	0.0021424	0.0107931	0.00661467	0.00069837	0.00165904	0.00182104
		floor-rise farming	0.0173771	0.00778197	0.00127411	0.00617866	0.0021424	0.0108403	0.00661467	0.000575894	0.0017216	0.00192816
		manual dry cleaning manure	0.0173668	0.00778197	0.00154206	0.00590039	0.0021424	0.0102665	0.00661467	0.000575894	0.00114773	0.00192816
		mechanical dry clearing manure	0.0168804	0.00778197	0.00143338	0.00552267	0.0021424	0.0113071	0.00661467	0.000575894	0.00229546	0.00182104
		Water flushing feces	0.017494	0.00778197	0.00143338	0.0061363	0.0021424	0.0106646	0.00661467	0.000558696	0.00167018	0.00182104
	dairy cattle
		bedding / litter	18.6447	4.16616	2.9724	7.85158	3.65452	12.0986	3.83286	1.24666	3.91271	3.10634
		Blistering feces	18.7839	4.16616	3.01064	7.95261	3.65452	12.6244	3.83286	1.55832	3.8711	3.36216
		floor-rise farming	18.5387	4.16616	2.67613	8.04192	3.65452	12.1633	3.83286	1.2623	3.96179	3.10634
		manual dry cleaning manure	18.8867	4.16616	3.30267	7.7634	3.65452	10.556	3.83286	1.25448	2.36235	3.10634
		mechanical dry clearing manure	18.7839	4.16616	3.01064	7.95261	3.65452	12.1633	3.83286	1.2623	3.96179	3.10634
		Water flushing feces	18.7839	4.16616	3.01064	7.95261	3.65452	12.3544	3.83286	1.24666	3.91271	3.36216
	layer
		bedding / litter	0.145105	0.0697723	0.00563124	0.0520643	0.0176376	0.0898951	0.0613996	0.00189497	0.0107266	0.0158738
		Blistering feces	0.147229	0.0697723	0.00583847	0.0539803	0.0176376	0.0960617	0.0613996	0.00315829	0.0159827	0.0155211
		floor-rise farming	0.146763	0.0697723	0.00518975	0.0541638	0.0176376	0.0958364	0.0613996	0.00252663	0.0160363	0.0158738
		manual dry cleaning manure	0.145554	0.0697723	0.00625694	0.0518873	0.0176376	0.0931104	0.0593064	0.0024405	0.0154896	0.0158738
		mechanical dry clearing manure	0.141831	0.0697723	0.00583847	0.0485822	0.0176376	0.0975741	0.0593064	0.00188909	0.0213866	0.014992
		Water flushing feces	0.147229	0.0697723	0.00583847	0.0539803	0.0176376	0.0954836	0.0613996	0.00252663	0.0160363	0.0155211
	pig
		bedding / litter	1.38144	0.497067	0.406154	0.456979	0.0212422	0.877475	0.44736	0.169691	0.241306	0.019118
		Blistering feces	1.40065	0.497067	0.415191	0.467147	0.0212422	0.914595	0.44736	0.212114	0.236003	0.019118
		floor-rise farming	1.36605	0.497067	0.369059	0.47868	0.0212422	0.88623	0.44736	0.173306	0.246446	0.019118
		manual dry cleaning manure	1.41529	0.497067	0.451282	0.445697	0.0212422	0.78659	0.44736	0.173306	0.147867	0.0180559
		mechanical dry clearing manure	1.40065	0.497067	0.415191	0.467147	0.0212422	0.88623	0.44736	0.173306	0.246446	0.019118
		Water flushing feces	1.40065	0.497067	0.415191	0.467147	0.0212422	0.877475	0.44736	0.169691	0.241306	0.019118
Chongqing
	beef cattle
		bedding / litter	12.3227	2.49612	2.13317	5.63475	2.05866	7.73362	2.29643	0.890967	2.79635	1.74986
		Blistering feces	12.4061	2.49612	2.15608	5.69528	2.05866	8.07073	2.29643	1.11371	2.76662	1.89397
		floor-rise farming	12.2305	2.49612	1.91652	5.75925	2.05866	7.9165	2.29643	0.900337	2.82576	1.89397
		manual dry cleaning manure	12.4964	2.49612	2.37019	5.57147	2.05866	6.27833	2.29643	1.11957	1.11247	1.74986
		mechanical dry clearing manure	12.4061	2.49612	2.15608	5.69528	2.05866	7.77239	2.29643	0.900337	2.82576	1.74986
		Water flushing feces	12.4061	2.49612	2.15608	5.69528	2.05866	7.87772	2.29643	0.890967	2.79635	1.89397
	broiler
		bedding / litter	0.027219	0.0122767	0.00218945	0.00937304	0.00337981	0.0159063	0.0104352	0.00066104	0.00176829	0.00304183
		Blistering feces	0.0275982	0.0122767	0.00226127	0.0096805	0.00337981	0.017027	0.0104352	0.00110173	0.00261726	0.00287284
		floor-rise farming	0.0274138	0.0122767	0.00201001	0.00974733	0.00337981	0.0169325	0.0104352	0.000908519	0.00271595	0.00287284
		manual dry cleaning manure	0.0273975	0.0122767	0.00243272	0.00930833	0.00337981	0.0161962	0.0104352	0.000908519	0.00181064	0.00304183
		mechanical dry clearing manure	0.0266302	0.0122767	0.00226127	0.00871245	0.00337981	0.0178378	0.0104352	0.000908519	0.00362127	0.00287284
		Water flushing feces	0.0275982	0.0122767	0.00226127	0.0096805	0.00337981	0.0168242	0.0104352	0.000881387	0.00263485	0.00287284
	dairy cattle
		bedding / litter	10.687	2.38802	1.70376	4.50048	2.09475	6.93484	2.19698	0.714577	2.24274	1.78054
		Blistering feces	10.7668	2.38802	1.72568	4.55839	2.09475	7.23626	2.19698	0.893221	2.21889	1.92717
		floor-rise farming	10.6263	2.38802	1.53394	4.60959	2.09475	7.11857	2.19698	0.723541	2.27088	1.92717
		manual dry cleaning manure	10.8258	2.38802	1.89307	4.44994	2.09475	6.05066	2.19698	0.719059	1.35409	1.78054
		mechanical dry clearing manure	10.7668	2.38802	1.72568	4.55839	2.09475	6.97193	2.19698	0.723541	2.27088	1.78054
		Water flushing feces	10.7668	2.38802	1.72568	4.55839	2.09475	7.08147	2.19698	0.714577	2.24274	1.92717
	layer
		bedding / litter	0.110102	0.0529412	0.00427283	0.0395049	0.0133829	0.0682098	0.0465882	0.00143785	0.00813906	0.0120446
		Blistering feces	0.111713	0.0529412	0.00443006	0.0409587	0.0133829	0.0728888	0.0465882	0.00239642	0.0121272	0.011777
		floor-rise farming	0.11136	0.0529412	0.00393783	0.041098	0.0133829	0.0724502	0.0465882	0.00191714	0.0121679	0.011777
		manual dry cleaning manure	0.110442	0.0529412	0.00474758	0.0393706	0.0133829	0.0706495	0.045	0.00185178	0.0117531	0.0120446
		mechanical dry clearing manure	0.107617	0.0529412	0.00443006	0.0368628	0.0133829	0.0740364	0.045	0.00143338	0.0162275	0.0113755
		Water flushing feces	0.111713	0.0529412	0.00443006	0.0409587	0.0133829	0.0724502	0.0465882	0.00191714	0.0121679	0.011777
	pig
		bedding / litter	2.10102	0.755985	0.617716	0.695016	0.0323071	1.33454	0.680387	0.258082	0.367	0.0290764
		Blistering feces	2.13023	0.755985	0.63146	0.71048	0.0323071	1.391	0.680387	0.322602	0.358935	0.0290764
		floor-rise farming	2.07761	0.755985	0.561298	0.72802	0.0323071	1.34786	0.680387	0.263579	0.374817	0.0290764
		manual dry cleaning manure	2.1525	0.755985	0.686351	0.677857	0.0323071	1.19632	0.680387	0.263579	0.22489	0.027461
		mechanical dry clearing manure	2.13023	0.755985	0.63146	0.71048	0.0323071	1.34786	0.680387	0.263579	0.374817	0.0290764
		Water flushing feces	2.13023	0.755985	0.63146	0.71048	0.0323071	1.33454	0.680387	0.258082	0.367	0.0290764
Fujian
	beef cattle
		bedding / litter	10.9061	2.20917	1.88794	4.98699	1.822	6.84457	2.03244	0.788543	2.47489	1.5487
		Blistering feces	10.98	2.20917	1.90822	5.04056	1.822	7.14293	2.03244	0.985679	2.44857	1.67624
		floor-rise farming	10.8245	2.20917	1.6962	5.09717	1.822	6.87889	2.03244	0.796835	2.50091	1.5487
		manual dry cleaning manure	11.0599	2.20917	2.09771	4.93098	1.822	5.55658	2.03244	0.990861	0.984578	1.5487
		mechanical dry clearing manure	10.98	2.20917	1.90822	5.04056	1.822	6.87889	2.03244	0.796835	2.50091	1.5487
		Water flushing feces	10.98	2.20917	1.90822	5.04056	1.822	6.97211	2.03244	0.788543	2.47489	1.67624
	broiler
		bedding / litter	0.0237709	0.0107215	0.00191209	0.00818566	0.00295166	0.0138913	0.00911324	0.0005773	0.00154428	0.00265649
		Blistering feces	0.0241021	0.0107215	0.00197481	0.00845417	0.00295166	0.01487	0.00911324	0.000962166	0.00228571	0.00250891
		floor-rise farming	0.023941	0.0107215	0.00175539	0.00851254	0.00295166	0.0149351	0.00911324	0.000793428	0.0023719	0.00265649
		manual dry cleaning manure	0.0239268	0.0107215	0.00212454	0.00812915	0.00295166	0.0141444	0.00911324	0.000793428	0.00158126	0.00265649
		mechanical dry clearing manure	0.0232567	0.0107215	0.00197481	0.00760875	0.00295166	0.0155781	0.00911324	0.000793428	0.00316253	0.00250891
		Water flushing feces	0.0241021	0.0107215	0.00197481	0.00845417	0.00295166	0.0146929	0.00911324	0.000769733	0.00230106	0.00250891
	dairy cattle
		bedding / litter	18.4839	4.13023	2.94676	7.78387	3.62301	11.9942	3.79981	1.23591	3.87896	3.07956
		Blistering feces	18.6219	4.13023	2.98468	7.88402	3.62301	12.5156	3.79981	1.54488	3.83771	3.33317
		floor-rise farming	18.3789	4.13023	2.65305	7.97257	3.62301	12.0584	3.79981	1.25141	3.92762	3.07956
		manual dry cleaning manure	18.7239	4.13023	3.27418	7.69645	3.62301	10.465	3.79981	1.24366	2.34198	3.07956
		mechanical dry clearing manure	18.6219	4.13023	2.98468	7.88402	3.62301	12.0584	3.79981	1.25141	3.92762	3.07956
		Water flushing feces	18.6219	4.13023	2.98468	7.88402	3.62301	12.2478	3.79981	1.23591	3.87896	3.33317
	layer
		bedding / litter	0.122286	0.0587996	0.00474566	0.0438765	0.0148638	0.0757578	0.0517437	0.00159696	0.00903973	0.0133775
		Blistering feces	0.124075	0.0587996	0.00492029	0.0454911	0.0148638	0.0809547	0.0517437	0.00266161	0.0134692	0.0130802
		floor-rise farming	0.123683	0.0587996	0.00437359	0.0456459	0.0148638	0.0807648	0.0517437	0.00212929	0.0135144	0.0133775
		manual dry cleaning manure	0.122664	0.0587996	0.00527295	0.0437273	0.0148638	0.0784675	0.0499797	0.0020567	0.0130537	0.0133775
		mechanical dry clearing manure	0.119526	0.0587996	0.00492029	0.040942	0.0148638	0.0822293	0.0499797	0.001592	0.0180233	0.0126343
		Water flushing feces	0.124075	0.0587996	0.00492029	0.0454911	0.0148638	0.0804676	0.0517437	0.00212929	0.0135144	0.0130802
	pig
		bedding / litter	1.56881	0.564486	0.461242	0.51896	0.0241233	0.996489	0.508037	0.192707	0.274035	0.021711
		Blistering feces	1.59062	0.564486	0.471504	0.530507	0.0241233	1.03864	0.508037	0.240883	0.268012	0.021711
		floor-rise farming	1.55133	0.564486	0.419115	0.543604	0.0241233	1.00643	0.508037	0.196812	0.279872	0.021711
		manual dry cleaning manure	1.60725	0.564486	0.512491	0.506148	0.0241233	0.893277	0.508037	0.196812	0.167923	0.0205048
		mechanical dry clearing manure	1.59062	0.564486	0.471504	0.530507	0.0241233	1.00643	0.508037	0.196812	0.279872	0.021711
		Water flushing feces	1.59062	0.564486	0.471504	0.530507	0.0241233	0.996489	0.508037	0.192707	0.274035	0.021711
Gansu
	beef cattle
		bedding / litter	8.95089	1.81312	1.54948	4.09294	1.49536	5.61749	1.66807	0.647175	2.0312	1.27105
		Blistering feces	9.0115	1.81312	1.56612	4.1369	1.49536	5.86236	1.66807	0.808969	2.0096	1.37573
		floor-rise farming	8.88394	1.81312	1.39211	4.18336	1.49536	5.64566	1.66807	0.653981	2.05256	1.27105
		manual dry cleaning manure	9.07708	1.81312	1.72164	4.04697	1.49536	4.56041	1.66807	0.813222	0.808065	1.27105
		mechanical dry clearing manure	9.0115	1.81312	1.56612	4.1369	1.49536	5.64566	1.66807	0.653981	2.05256	1.27105
		Water flushing feces	9.0115	1.81312	1.56612	4.1369	1.49536	5.72217	1.66807	0.647175	2.0312	1.37573
	broiler
		bedding / litter	0.0186622	0.00841726	0.00150115	0.00642644	0.0023173	0.0109059	0.00715467	0.00045323	0.00121239	0.00208557
		Blistering feces	0.0189222	0.00841726	0.00155039	0.00663724	0.0023173	0.0116742	0.00715467	0.000755383	0.00179448	0.00196971
		floor-rise farming	0.0187958	0.00841726	0.00137813	0.00668307	0.0023173	0.0117253	0.00715467	0.000622908	0.00186214	0.00208557
		manual dry cleaning manure	0.0187846	0.00841726	0.00166795	0.00638208	0.0023173	0.0111046	0.00715467	0.000622908	0.00124143	0.00208557
		mechanical dry clearing manure	0.0182585	0.00841726	0.00155039	0.00597352	0.0023173	0.0122301	0.00715467	0.000622908	0.00248285	0.00196971
		Water flushing feces	0.0189222	0.00841726	0.00155039	0.00663724	0.0023173	0.0115352	0.00715467	0.000604306	0.00180653	0.00196971
	dairy cattle
		bedding / litter	19.6773	4.3969	3.13703	8.28645	3.85693	12.7687	4.04515	1.3157	4.12941	3.27839
		Blistering feces	19.8243	4.3969	3.17739	8.39307	3.85693	13.3237	4.04515	1.64463	4.0855	3.54838
		floor-rise farming	19.5655	4.3969	2.82435	8.48733	3.85693	12.837	4.04515	1.33221	4.18121	3.27839
		manual dry cleaning manure	19.9328	4.3969	3.48559	8.19338	3.85693	11.1407	4.04515	1.32396	2.49319	3.27839
		mechanical dry clearing manure	19.8243	4.3969	3.17739	8.39307	3.85693	12.837	4.04515	1.33221	4.18121	3.27839
		Water flushing feces	19.8243	4.3969	3.17739	8.39307	3.85693	13.0386	4.04515	1.3157	4.12941	3.54838
	layer
		bedding / litter	0.157883	0.0759162	0.00612712	0.056649	0.0191907	0.097811	0.0668063	0.00206184	0.0116712	0.0172716
		Blistering feces	0.160193	0.0759162	0.00635259	0.0587336	0.0191907	0.104521	0.0668063	0.0034364	0.0173901	0.0168878
		floor-rise farming	0.159687	0.0759162	0.00564675	0.0589334	0.0191907	0.104276	0.0668063	0.00274912	0.0174484	0.0172716
		manual dry cleaning manure	0.158371	0.0759162	0.00680791	0.0564563	0.0191907	0.101309	0.0645288	0.0026554	0.0168536	0.0172716
		mechanical dry clearing manure	0.15432	0.0759162	0.00635259	0.0528603	0.0191907	0.106166	0.0645288	0.00205543	0.0232699	0.0163121
		Water flushing feces	0.160193	0.0759162	0.00635259	0.0587336	0.0191907	0.103892	0.0668063	0.00274912	0.0174484	0.0168878
	pig
		bedding / litter	2.19789	0.79084	0.646196	0.727059	0.0337966	1.39607	0.711756	0.26998	0.38392	0.0304169
		Blistering feces	2.22845	0.79084	0.660573	0.743236	0.0337966	1.45513	0.711756	0.337475	0.375483	0.0304169
		floor-rise farming	2.1734	0.79084	0.587176	0.761585	0.0337966	1.41	0.711756	0.275731	0.392098	0.0304169
		manual dry cleaning manure	2.25174	0.79084	0.717996	0.709109	0.0337966	1.25147	0.711756	0.275731	0.235259	0.0287271
		mechanical dry clearing manure	2.22845	0.79084	0.660573	0.743236	0.0337966	1.41	0.711756	0.275731	0.392098	0.0304169
		Water flushing feces	2.22845	0.79084	0.660573	0.743236	0.0337966	1.39607	0.711756	0.26998	0.38392	0.0304169
Guangdong
	beef cattle
		bedding / litter	12.0654	2.44401	2.08863	5.51711	2.01568	7.57215	2.24849	0.872365	2.73797	1.71333
		Blistering feces	12.1471	2.44401	2.11107	5.57637	2.01568	7.90222	2.24849	1.09046	2.70885	1.85442
		floor-rise farming	11.9752	2.44401	1.8765	5.639	2.01568	7.61012	2.24849	0.881539	2.76676	1.71333
		manual dry cleaning manure	12.2355	2.44401	2.3207	5.45515	2.01568	6.14724	2.24849	1.09619	1.08924	1.71333
		mechanical dry clearing manure	12.1471	2.44401	2.11107	5.57637	2.01568	7.61012	2.24849	0.881539	2.76676	1.71333
		Water flushing feces	12.1471	2.44401	2.11107	5.57637	2.01568	7.71325	2.24849	0.872365	2.73797	1.85442
	broiler
		bedding / litter	0.0164986	0.0074414	0.00132712	0.00568139	0.00204865	0.00964149	0.00632519	0.000400684	0.00107183	0.00184378
		Blistering feces	0.0167284	0.0074414	0.00137065	0.00586775	0.00204865	0.0103208	0.00632519	0.000667807	0.00158643	0.00174135
		floor-rise farming	0.0166167	0.0074414	0.00121835	0.00590826	0.00204865	0.0103659	0.00632519	0.000550691	0.00164625	0.00184378
		manual dry cleaning manure	0.0166068	0.0074414	0.00147457	0.00564217	0.00204865	0.00981717	0.00632519	0.000550691	0.0010975	0.00184378
		mechanical dry clearing manure	0.0161417	0.0074414	0.00137065	0.00528098	0.00204865	0.0108122	0.00632519	0.000550691	0.002195	0.00174135
		Water flushing feces	0.0167284	0.0074414	0.00137065	0.00586775	0.00204865	0.0101979	0.00632519	0.000534246	0.00159709	0.00174135
	dairy cattle
		bedding / litter	11.3128	2.52786	1.80353	4.76402	2.21742	7.34093	2.32563	0.756421	2.37407	1.8848
		Blistering feces	11.3973	2.52786	1.82674	4.82532	2.21742	7.66001	2.32563	0.945527	2.34883	2.04002
		floor-rise farming	11.2486	2.52786	1.62377	4.87952	2.21742	7.3802	2.32563	0.76591	2.40385	1.8848
		manual dry cleaning manure	11.4597	2.52786	2.00392	4.71052	2.21742	6.40498	2.32563	0.761166	1.43338	1.8848
		mechanical dry clearing manure	11.3973	2.52786	1.82674	4.82532	2.21742	7.3802	2.32563	0.76591	2.40385	1.8848
		Water flushing feces	11.3973	2.52786	1.82674	4.82532	2.21742	7.49615	2.32563	0.756421	2.37407	2.04002
	layer
		bedding / litter	0.137562	0.0661452	0.0053385	0.0493578	0.0167207	0.0852219	0.0582077	0.00179646	0.010169	0.0150486
		Blistering feces	0.139575	0.0661452	0.00553496	0.0511741	0.0167207	0.0910679	0.0582077	0.00299411	0.0151518	0.0147142
		floor-rise farming	0.139134	0.0661452	0.00491996	0.0513481	0.0167207	0.0908543	0.0582077	0.00239529	0.0152027	0.0150486
		manual dry cleaning manure	0.137987	0.0661452	0.00593167	0.0491899	0.0167207	0.0882701	0.0562234	0.00231363	0.0146844	0.0150486
		mechanical dry clearing manure	0.134458	0.0661452	0.00553496	0.0460567	0.0167207	0.0925017	0.0562234	0.00179088	0.0202748	0.0142126
		Water flushing feces	0.139575	0.0661452	0.00553496	0.0511741	0.0167207	0.0905199	0.0582077	0.00239529	0.0152027	0.0147142
	pig
		bedding / litter	1.88429	0.677999	0.553994	0.623319	0.0289743	1.19687	0.610199	0.231458	0.329141	0.0260769
		Blistering feces	1.91048	0.677999	0.56632	0.637187	0.0289743	1.24751	0.610199	0.289323	0.321907	0.0260769
		floor-rise farming	1.86329	0.677999	0.503395	0.652919	0.0289743	1.20882	0.610199	0.236389	0.336152	0.0260769
		manual dry cleaning manure	1.93045	0.677999	0.615548	0.60793	0.0289743	1.07291	0.610199	0.236389	0.201691	0.0246282
		mechanical dry clearing manure	1.91048	0.677999	0.56632	0.637187	0.0289743	1.20882	0.610199	0.236389	0.336152	0.0260769
		Water flushing feces	1.91048	0.677999	0.56632	0.637187	0.0289743	1.19687	0.610199	0.231458	0.329141	0.0260769
Guangxi
	beef cattle
		bedding / litter	12.0654	2.44401	2.08863	5.51711	2.01568	7.57215	2.24849	0.872365	2.73797	1.71333
		Blistering feces	12.1471	2.44401	2.11107	5.57637	2.01568	7.90222	2.24849	1.09046	2.70885	1.85442
		floor-rise farming	11.9752	2.44401	1.8765	5.639	2.01568	7.61012	2.24849	0.881539	2.76676	1.71333
		manual dry cleaning manure	12.2355	2.44401	2.3207	5.45515	2.01568	6.14724	2.24849	1.09619	1.08924	1.71333
		mechanical dry clearing manure	12.1471	2.44401	2.11107	5.57637	2.01568	7.61012	2.24849	0.881539	2.76676	1.71333
		Water flushing feces	12.1471	2.44401	2.11107	5.57637	2.01568	7.71325	2.24849	0.872365	2.73797	1.85442
	broiler
		bedding / litter	0.0164986	0.0074414	0.00132712	0.00568139	0.00204865	0.00964149	0.00632519	0.000400684	0.00107183	0.00184378
		Blistering feces	0.0167284	0.0074414	0.00137065	0.00586775	0.00204865	0.0103208	0.00632519	0.000667807	0.00158643	0.00174135
		floor-rise farming	0.0166167	0.0074414	0.00121835	0.00590826	0.00204865	0.0103659	0.00632519	0.000550691	0.00164625	0.00184378
		manual dry cleaning manure	0.0166068	0.0074414	0.00147457	0.00564217	0.00204865	0.00981717	0.00632519	0.000550691	0.0010975	0.00184378
		mechanical dry clearing manure	0.0161417	0.0074414	0.00137065	0.00528098	0.00204865	0.0108122	0.00632519	0.000550691	0.002195	0.00174135
		Water flushing feces	0.0167284	0.0074414	0.00137065	0.00586775	0.00204865	0.0101979	0.00632519	0.000534246	0.00159709	0.00174135
	dairy cattle
		bedding / litter	11.3128	2.52786	1.80353	4.76402	2.21742	7.34093	2.32563	0.756421	2.37407	1.8848
		Blistering feces	11.3973	2.52786	1.82674	4.82532	2.21742	7.66001	2.32563	0.945527	2.34883	2.04002
		floor-rise farming	11.2486	2.52786	1.62377	4.87952	2.21742	7.3802	2.32563	0.76591	2.40385	1.8848
		manual dry cleaning manure	11.4597	2.52786	2.00392	4.71052	2.21742	6.40498	2.32563	0.761166	1.43338	1.8848
		mechanical dry clearing manure	11.3973	2.52786	1.82674	4.82532	2.21742	7.3802	2.32563	0.76591	2.40385	1.8848
		Water flushing feces	11.3973	2.52786	1.82674	4.82532	2.21742	7.49615	2.32563	0.756421	2.37407	2.04002
	layer
		bedding / litter	0.137562	0.0661452	0.0053385	0.0493578	0.0167207	0.0852219	0.0582077	0.00179646	0.010169	0.0150486
		Blistering feces	0.139575	0.0661452	0.00553496	0.0511741	0.0167207	0.0910679	0.0582077	0.00299411	0.0151518	0.0147142
		floor-rise farming	0.139134	0.0661452	0.00491996	0.0513481	0.0167207	0.0908543	0.0582077	0.00239529	0.0152027	0.0150486
		manual dry cleaning manure	0.137987	0.0661452	0.00593167	0.0491899	0.0167207	0.0882701	0.0562234	0.00231363	0.0146844	0.0150486
		mechanical dry clearing manure	0.134458	0.0661452	0.00553496	0.0460567	0.0167207	0.0925017	0.0562234	0.00179088	0.0202748	0.0142126
		Water flushing feces	0.139575	0.0661452	0.00553496	0.0511741	0.0167207	0.0905199	0.0582077	0.00239529	0.0152027	0.0147142
	pig
		bedding / litter	1.88429	0.677999	0.553994	0.623319	0.0289743	1.19687	0.610199	0.231458	0.329141	0.0260769
		Blistering feces	1.91048	0.677999	0.56632	0.637187	0.0289743	1.24751	0.610199	0.289323	0.321907	0.0260769
		floor-rise farming	1.86329	0.677999	0.503395	0.652919	0.0289743	1.20882	0.610199	0.236389	0.336152	0.0260769
		manual dry cleaning manure	1.93045	0.677999	0.615548	0.60793	0.0289743	1.07291	0.610199	0.236389	0.201691	0.0246282
		mechanical dry clearing manure	1.91048	0.677999	0.56632	0.637187	0.0289743	1.20882	0.610199	0.236389	0.336152	0.0260769
		Water flushing feces	1.91048	0.677999	0.56632	0.637187	0.0289743	1.19687	0.610199	0.231458	0.329141	0.0260769
Guizhou
	beef cattle
		bedding / litter	12.3227	2.49612	2.13317	5.63475	2.05866	7.73362	2.29643	0.890967	2.79635	1.74986
		Blistering feces	12.4061	2.49612	2.15608	5.69528	2.05866	8.07073	2.29643	1.11371	2.76662	1.89397
		floor-rise farming	12.2305	2.49612	1.91652	5.75925	2.05866	7.77239	2.29643	0.900337	2.82576	1.74986
		manual dry cleaning manure	12.4964	2.49612	2.37019	5.57147	2.05866	6.27833	2.29643	1.11957	1.11247	1.74986
		mechanical dry clearing manure	12.4061	2.49612	2.15608	5.69528	2.05866	7.77239	2.29643	0.900337	2.82576	1.74986
		Water flushing feces	12.4061	2.49612	2.15608	5.69528	2.05866	7.87772	2.29643	0.890967	2.79635	1.89397
	broiler
		bedding / litter	0.027219	0.0122767	0.00218945	0.00937304	0.00337981	0.0159063	0.0104352	0.00066104	0.00176829	0.00304183
		Blistering feces	0.0275982	0.0122767	0.00226127	0.0096805	0.00337981	0.017027	0.0104352	0.00110173	0.00261726	0.00287284
		floor-rise farming	0.0274138	0.0122767	0.00201001	0.00974733	0.00337981	0.0171015	0.0104352	0.000908519	0.00271595	0.00304183
		manual dry cleaning manure	0.0273975	0.0122767	0.00243272	0.00930833	0.00337981	0.0161962	0.0104352	0.000908519	0.00181064	0.00304183
		mechanical dry clearing manure	0.0266302	0.0122767	0.00226127	0.00871245	0.00337981	0.0178378	0.0104352	0.000908519	0.00362127	0.00287284
		Water flushing feces	0.0275982	0.0122767	0.00226127	0.0096805	0.00337981	0.0168242	0.0104352	0.000881387	0.00263485	0.00287284
	dairy cattle
		bedding / litter	10.687	2.38802	1.70376	4.50048	2.09475	6.93484	2.19698	0.714577	2.24274	1.78054
		Blistering feces	10.7668	2.38802	1.72568	4.55839	2.09475	7.23626	2.19698	0.893221	2.21889	1.92717
		floor-rise farming	10.6263	2.38802	1.53394	4.60959	2.09475	6.97193	2.19698	0.723541	2.27088	1.78054
		manual dry cleaning manure	10.8258	2.38802	1.89307	4.44994	2.09475	6.05066	2.19698	0.719059	1.35409	1.78054
		mechanical dry clearing manure	10.7668	2.38802	1.72568	4.55839	2.09475	6.97193	2.19698	0.723541	2.27088	1.78054
		Water flushing feces	10.7668	2.38802	1.72568	4.55839	2.09475	7.08147	2.19698	0.714577	2.24274	1.92717
	layer
		bedding / litter	0.110102	0.0529412	0.00427283	0.0395049	0.0133829	0.0682098	0.0465882	0.00143785	0.00813906	0.0120446
		Blistering feces	0.111713	0.0529412	0.00443006	0.0409587	0.0133829	0.0728888	0.0465882	0.00239642	0.0121272	0.011777
		floor-rise farming	0.11136	0.0529412	0.00393783	0.041098	0.0133829	0.0727179	0.0465882	0.00191714	0.0121679	0.0120446
		manual dry cleaning manure	0.110442	0.0529412	0.00474758	0.0393706	0.0133829	0.0706495	0.045	0.00185178	0.0117531	0.0120446
		mechanical dry clearing manure	0.107617	0.0529412	0.00443006	0.0368628	0.0133829	0.0740364	0.045	0.00143338	0.0162275	0.0113755
		Water flushing feces	0.111713	0.0529412	0.00443006	0.0409587	0.0133829	0.0724502	0.0465882	0.00191714	0.0121679	0.011777
	pig
		bedding / litter	2.10102	0.755985	0.617716	0.695016	0.0323071	1.33454	0.680387	0.258082	0.367	0.0290764
		Blistering feces	2.13023	0.755985	0.63146	0.71048	0.0323071	1.391	0.680387	0.322602	0.358935	0.0290764
		floor-rise farming	2.07761	0.755985	0.561298	0.72802	0.0323071	1.34786	0.680387	0.263579	0.374817	0.0290764
		manual dry cleaning manure	2.1525	0.755985	0.686351	0.677857	0.0323071	1.19632	0.680387	0.263579	0.22489	0.027461
		mechanical dry clearing manure	2.13023	0.755985	0.63146	0.71048	0.0323071	1.34786	0.680387	0.263579	0.374817	0.0290764
		Water flushing feces	2.13023	0.755985	0.63146	0.71048	0.0323071	1.33454	0.680387	0.258082	0.367	0.0290764
Hainan
	beef cattle
		bedding / litter	12.0654	2.44401	2.08863	5.51711	2.01568	7.57215	2.24849	0.872365	2.73797	1.71333
		Blistering feces	12.1471	2.44401	2.11107	5.57637	2.01568	7.90222	2.24849	1.09046	2.70885	1.85442
		floor-rise farming	11.9752	2.44401	1.8765	5.639	2.01568	7.61012	2.24849	0.881539	2.76676	1.71333
		manual dry cleaning manure	12.2355	2.44401	2.3207	5.45515	2.01568	6.14724	2.24849	1.09619	1.08924	1.71333
		mechanical dry clearing manure	12.1471	2.44401	2.11107	5.57637	2.01568	7.61012	2.24849	0.881539	2.76676	1.71333
		Water flushing feces	12.1471	2.44401	2.11107	5.57637	2.01568	7.71325	2.24849	0.872365	2.73797	1.85442
	broiler
		bedding / litter	0.0164986	0.0074414	0.00132712	0.00568139	0.00204865	0.00964149	0.00632519	0.000400684	0.00107183	0.00184378
		Blistering feces	0.0167284	0.0074414	0.00137065	0.00586775	0.00204865	0.0103208	0.00632519	0.000667807	0.00158643	0.00174135
		floor-rise farming	0.0166167	0.0074414	0.00121835	0.00590826	0.00204865	0.0103659	0.00632519	0.000550691	0.00164625	0.00184378
		manual dry cleaning manure	0.0166068	0.0074414	0.00147457	0.00564217	0.00204865	0.00981717	0.00632519	0.000550691	0.0010975	0.00184378
		mechanical dry clearing manure	0.0161417	0.0074414	0.00137065	0.00528098	0.00204865	0.0108122	0.00632519	0.000550691	0.002195	0.00174135
		Water flushing feces	0.0167284	0.0074414	0.00137065	0.00586775	0.00204865	0.0101979	0.00632519	0.000534246	0.00159709	0.00174135
	dairy cattle
		bedding / litter	11.3128	2.52786	1.80353	4.76402	2.21742	7.34093	2.32563	0.756421	2.37407	1.8848
		Blistering feces	11.3973	2.52786	1.82674	4.82532	2.21742	7.66001	2.32563	0.945527	2.34883	2.04002
		floor-rise farming	11.2486	2.52786	1.62377	4.87952	2.21742	7.3802	2.32563	0.76591	2.40385	1.8848
		manual dry cleaning manure	11.4597	2.52786	2.00392	4.71052	2.21742	6.40498	2.32563	0.761166	1.43338	1.8848
		mechanical dry clearing manure	11.3973	2.52786	1.82674	4.82532	2.21742	7.3802	2.32563	0.76591	2.40385	1.8848
		Water flushing feces	11.3973	2.52786	1.82674	4.82532	2.21742	7.49615	2.32563	0.756421	2.37407	2.04002
	layer
		bedding / litter	0.137562	0.0661452	0.0053385	0.0493578	0.0167207	0.0852219	0.0582077	0.00179646	0.010169	0.0150486
		Blistering feces	0.139575	0.0661452	0.00553496	0.0511741	0.0167207	0.0910679	0.0582077	0.00299411	0.0151518	0.0147142
		floor-rise farming	0.139134	0.0661452	0.00491996	0.0513481	0.0167207	0.0908543	0.0582077	0.00239529	0.0152027	0.0150486
		manual dry cleaning manure	0.137987	0.0661452	0.00593167	0.0491899	0.0167207	0.0882701	0.0562234	0.00231363	0.0146844	0.0150486
		mechanical dry clearing manure	0.134458	0.0661452	0.00553496	0.0460567	0.0167207	0.0925017	0.0562234	0.00179088	0.0202748	0.0142126
		Water flushing feces	0.139575	0.0661452	0.00553496	0.0511741	0.0167207	0.0905199	0.0582077	0.00239529	0.0152027	0.0147142
	pig
		bedding / litter	1.88429	0.677999	0.553994	0.623319	0.0289743	1.19687	0.610199	0.231458	0.329141	0.0260769
		Blistering feces	1.91048	0.677999	0.56632	0.637187	0.0289743	1.24751	0.610199	0.289323	0.321907	0.0260769
		floor-rise farming	1.86329	0.677999	0.503395	0.652919	0.0289743	1.20882	0.610199	0.236389	0.336152	0.0260769
		manual dry cleaning manure	1.93045	0.677999	0.615548	0.60793	0.0289743	1.07291	0.610199	0.236389	0.201691	0.0246282
		mechanical dry clearing manure	1.91048	0.677999	0.56632	0.637187	0.0289743	1.20882	0.610199	0.236389	0.336152	0.0260769
		Water flushing feces	1.91048	0.677999	0.56632	0.637187	0.0289743	1.19687	0.610199	0.231458	0.329141	0.0260769
Hebei
	beef cattle
		bedding / litter	8.05371	1.63138	1.39417	3.68269	1.34547	5.05443	1.50087	0.582306	1.8276	1.14365
		Blistering feces	8.10824	1.63138	1.40914	3.72225	1.34547	5.27476	1.50087	0.727883	1.80817	1.23783
		floor-rise farming	7.99347	1.63138	1.25257	3.76405	1.34547	5.07977	1.50087	0.58843	1.84682	1.14365
		manual dry cleaning manure	8.16725	1.63138	1.54907	3.64133	1.34547	4.1033	1.50087	0.73171	0.72707	1.14365
		mechanical dry clearing manure	8.10824	1.63138	1.40914	3.72225	1.34547	5.07977	1.50087	0.58843	1.84682	1.14365
		Water flushing feces	8.10824	1.63138	1.40914	3.72225	1.34547	5.14861	1.50087	0.582306	1.8276	1.23783
	broiler
		bedding / litter	0.0172536	0.00778197	0.00138785	0.00594141	0.0021424	0.0100827	0.00661467	0.000419022	0.00112089	0.00192816
		Blistering feces	0.017494	0.00778197	0.00143338	0.0061363	0.0021424	0.0107931	0.00661467	0.00069837	0.00165904	0.00182104
		floor-rise farming	0.0173771	0.00778197	0.00127411	0.00617866	0.0021424	0.0108403	0.00661467	0.000575894	0.0017216	0.00192816
		manual dry cleaning manure	0.0173668	0.00778197	0.00154206	0.00590039	0.0021424	0.0102665	0.00661467	0.000575894	0.00114773	0.00192816
		mechanical dry clearing manure	0.0168804	0.00778197	0.00143338	0.00552267	0.0021424	0.0113071	0.00661467	0.000575894	0.00229546	0.00182104
		Water flushing feces	0.017494	0.00778197	0.00143338	0.0061363	0.0021424	0.0106646	0.00661467	0.000558696	0.00167018	0.00182104
	dairy cattle
		bedding / litter	18.6447	4.16616	2.9724	7.85158	3.65452	12.0986	3.83286	1.24666	3.91271	3.10634
		Blistering feces	18.7839	4.16616	3.01064	7.95261	3.65452	12.6244	3.83286	1.55832	3.8711	3.36216
		floor-rise farming	18.5387	4.16616	2.67613	8.04192	3.65452	12.1633	3.83286	1.2623	3.96179	3.10634
		manual dry cleaning manure	18.8867	4.16616	3.30267	7.7634	3.65452	10.556	3.83286	1.25448	2.36235	3.10634
		mechanical dry clearing manure	18.7839	4.16616	3.01064	7.95261	3.65452	12.1633	3.83286	1.2623	3.96179	3.10634
		Water flushing feces	18.7839	4.16616	3.01064	7.95261	3.65452	12.3544	3.83286	1.24666	3.91271	3.36216
	layer
		bedding / litter	0.145105	0.0697723	0.00563124	0.0520643	0.0176376	0.0898951	0.0613996	0.00189497	0.0107266	0.0158738
		Blistering feces	0.147229	0.0697723	0.00583847	0.0539803	0.0176376	0.0960617	0.0613996	0.00315829	0.0159827	0.0155211
		floor-rise farming	0.146763	0.0697723	0.00518975	0.0541638	0.0176376	0.0958364	0.0613996	0.00252663	0.0160363	0.0158738
		manual dry cleaning manure	0.145554	0.0697723	0.00625694	0.0518873	0.0176376	0.0931104	0.0593064	0.0024405	0.0154896	0.0158738
		mechanical dry clearing manure	0.141831	0.0697723	0.00583847	0.0485822	0.0176376	0.0975741	0.0593064	0.00188909	0.0213866	0.014992
		Water flushing feces	0.147229	0.0697723	0.00583847	0.0539803	0.0176376	0.0954836	0.0613996	0.00252663	0.0160363	0.0155211
	pig
		bedding / litter	1.38144	0.497067	0.406154	0.456979	0.0212422	0.877475	0.44736	0.169691	0.241306	0.019118
		Blistering feces	1.40065	0.497067	0.415191	0.467147	0.0212422	0.914595	0.44736	0.212114	0.236003	0.019118
		floor-rise farming	1.36605	0.497067	0.369059	0.47868	0.0212422	0.88623	0.44736	0.173306	0.246446	0.019118
		manual dry cleaning manure	1.41529	0.497067	0.451282	0.445697	0.0212422	0.78659	0.44736	0.173306	0.147867	0.0180559
		mechanical dry clearing manure	1.40065	0.497067	0.415191	0.467147	0.0212422	0.88623	0.44736	0.173306	0.246446	0.019118
		Water flushing feces	1.40065	0.497067	0.415191	0.467147	0.0212422	0.877475	0.44736	0.169691	0.241306	0.019118
Heilongjiang
	beef cattle
		bedding / litter	6.27135	1.27034	1.08562	2.86767	1.04771	3.93584	1.16872	0.453437	1.42314	0.89055
		Blistering feces	6.31381	1.27034	1.09729	2.89848	1.04771	4.1074	1.16872	0.566796	1.408	0.963889
		floor-rise farming	6.22445	1.27034	0.975366	2.93103	1.04771	3.95557	1.16872	0.458205	1.4381	0.89055
		manual dry cleaning manure	6.35977	1.27034	1.20625	2.83547	1.04771	3.1952	1.16872	0.569776	0.566163	0.89055
		mechanical dry clearing manure	6.31381	1.27034	1.09729	2.89848	1.04771	3.95557	1.16872	0.458205	1.4381	0.89055
		Water flushing feces	6.31381	1.27034	1.09729	2.89848	1.04771	4.00918	1.16872	0.453437	1.42314	0.963889
	broiler
		bedding / litter	0.0226496	0.0102157	0.00182189	0.00779955	0.00281243	0.0132361	0.00868337	0.000550069	0.00147144	0.00253118
		Blistering feces	0.0229652	0.0102157	0.00188166	0.00805539	0.00281243	0.0141686	0.00868337	0.000916781	0.00217789	0.00239056
		floor-rise farming	0.0228117	0.0102157	0.00167258	0.008111	0.00281243	0.0142306	0.00868337	0.000756002	0.00226001	0.00253118
		manual dry cleaning manure	0.0227982	0.0102157	0.00202433	0.0077457	0.00281243	0.0134772	0.00868337	0.000756002	0.00150668	0.00253118
		mechanical dry clearing manure	0.0221597	0.0102157	0.00188166	0.00724985	0.00281243	0.0148433	0.00868337	0.000756002	0.00301335	0.00239056
		Water flushing feces	0.0229652	0.0102157	0.00188166	0.00805539	0.00281243	0.0139999	0.00868337	0.000733425	0.00219252	0.00239056
	dairy cattle
		bedding / litter	15.6745	3.50248	2.49889	6.6008	3.07235	10.1712	3.22228	1.04806	3.2894	2.61149
		Blistering feces	15.7916	3.50248	2.53104	6.68573	3.07235	10.6133	3.22228	1.31008	3.25442	2.82656
		floor-rise farming	15.5855	3.50248	2.24981	6.76082	3.07235	10.2256	3.22228	1.06121	3.33066	2.61149
		manual dry cleaning manure	15.878	3.50248	2.77654	6.52667	3.07235	8.87442	3.22228	1.05463	1.98602	2.61149
		mechanical dry clearing manure	15.7916	3.50248	2.53104	6.68573	3.07235	10.2256	3.22228	1.06121	3.33066	2.61149
		Water flushing feces	15.7916	3.50248	2.53104	6.68573	3.07235	10.3863	3.22228	1.04806	3.2894	2.82656
	layer
		bedding / litter	0.168951	0.0812382	0.00655665	0.0606203	0.020536	0.104668	0.0714896	0.00220638	0.0124894	0.0184824
		Blistering feces	0.171423	0.0812382	0.00679792	0.062851	0.020536	0.111848	0.0714896	0.0036773	0.0186092	0.0180717
		floor-rise farming	0.170882	0.0812382	0.0060426	0.0630648	0.020536	0.111586	0.0714896	0.00294184	0.0186716	0.0184824
		manual dry cleaning manure	0.169473	0.0812382	0.00728516	0.0604141	0.020536	0.108412	0.0690524	0.00284155	0.0180351	0.0184824
		mechanical dry clearing manure	0.165138	0.0812382	0.00679792	0.0565659	0.020536	0.113609	0.0690524	0.00219953	0.0249011	0.0174556
		Water flushing feces	0.171423	0.0812382	0.00679792	0.062851	0.020536	0.111175	0.0714896	0.00294184	0.0186716	0.0180717
	pig
		bedding / litter	2.17544	0.782762	0.639596	0.719633	0.0334514	1.38181	0.704486	0.267223	0.379999	0.0301062
		Blistering feces	2.20568	0.782762	0.653826	0.735644	0.0334514	1.44027	0.704486	0.334028	0.371648	0.0301062
		floor-rise farming	2.1512	0.782762	0.581179	0.753806	0.0334514	1.3956	0.704486	0.272915	0.388093	0.0301062
		manual dry cleaning manure	2.22874	0.782762	0.710662	0.701866	0.0334514	1.23869	0.704486	0.272915	0.232856	0.0284337
		mechanical dry clearing manure	2.20568	0.782762	0.653826	0.735644	0.0334514	1.3956	0.704486	0.272915	0.388093	0.0301062
		Water flushing feces	2.20568	0.782762	0.653826	0.735644	0.0334514	1.38181	0.704486	0.267223	0.379999	0.0301062
Henan
	beef cattle
		bedding / litter	12.0654	2.44401	2.08863	5.51711	2.01568	7.57215	2.24849	0.872365	2.73797	1.71333
		Blistering feces	12.1471	2.44401	2.11107	5.57637	2.01568	7.90222	2.24849	1.09046	2.70885	1.85442
		floor-rise farming	11.9752	2.44401	1.8765	5.639	2.01568	7.61012	2.24849	0.881539	2.76676	1.71333
		manual dry cleaning manure	12.2355	2.44401	2.3207	5.45515	2.01568	6.14724	2.24849	1.09619	1.08924	1.71333
		mechanical dry clearing manure	12.1471	2.44401	2.11107	5.57637	2.01568	7.61012	2.24849	0.881539	2.76676	1.71333
		Water flushing feces	12.1471	2.44401	2.11107	5.57637	2.01568	7.71325	2.24849	0.872365	2.73797	1.85442
	broiler
		bedding / litter	0.0164986	0.0074414	0.00132712	0.00568139	0.00204865	0.00964149	0.00632519	0.000400684	0.00107183	0.00184378
		Blistering feces	0.0167284	0.0074414	0.00137065	0.00586775	0.00204865	0.0103208	0.00632519	0.000667807	0.00158643	0.00174135
		floor-rise farming	0.0166167	0.0074414	0.00121835	0.00590826	0.00204865	0.0103659	0.00632519	0.000550691	0.00164625	0.00184378
		manual dry cleaning manure	0.0166068	0.0074414	0.00147457	0.00564217	0.00204865	0.00981717	0.00632519	0.000550691	0.0010975	0.00184378
		mechanical dry clearing manure	0.0161417	0.0074414	0.00137065	0.00528098	0.00204865	0.0108122	0.00632519	0.000550691	0.002195	0.00174135
		Water flushing feces	0.0167284	0.0074414	0.00137065	0.00586775	0.00204865	0.0101979	0.00632519	0.000534246	0.00159709	0.00174135
	dairy cattle
		bedding / litter	11.3128	2.52786	1.80353	4.76402	2.21742	7.34093	2.32563	0.756421	2.37407	1.8848
		Blistering feces	11.3973	2.52786	1.82674	4.82532	2.21742	7.66001	2.32563	0.945527	2.34883	2.04002
		floor-rise farming	11.2486	2.52786	1.62377	4.87952	2.21742	7.3802	2.32563	0.76591	2.40385	1.8848
		manual dry cleaning manure	11.4597	2.52786	2.00392	4.71052	2.21742	6.40498	2.32563	0.761166	1.43338	1.8848
		mechanical dry clearing manure	11.3973	2.52786	1.82674	4.82532	2.21742	7.3802	2.32563	0.76591	2.40385	1.8848
		Water flushing feces	11.3973	2.52786	1.82674	4.82532	2.21742	7.49615	2.32563	0.756421	2.37407	2.04002
	layer
		bedding / litter	0.137562	0.0661452	0.0053385	0.0493578	0.0167207	0.0852219	0.0582077	0.00179646	0.010169	0.0150486
		Blistering feces	0.139575	0.0661452	0.00553496	0.0511741	0.0167207	0.0910679	0.0582077	0.00299411	0.0151518	0.0147142
		floor-rise farming	0.139134	0.0661452	0.00491996	0.0513481	0.0167207	0.0908543	0.0582077	0.00239529	0.0152027	0.0150486
		manual dry cleaning manure	0.137987	0.0661452	0.00593167	0.0491899	0.0167207	0.0882701	0.0562234	0.00231363	0.0146844	0.0150486
		mechanical dry clearing manure	0.134458	0.0661452	0.00553496	0.0460567	0.0167207	0.0925017	0.0562234	0.00179088	0.0202748	0.0142126
		Water flushing feces	0.139575	0.0661452	0.00553496	0.0511741	0.0167207	0.0905199	0.0582077	0.00239529	0.0152027	0.0147142
	pig
		bedding / litter	1.88429	0.677999	0.553994	0.623319	0.0289743	1.19687	0.610199	0.231458	0.329141	0.0260769
		Blistering feces	1.91048	0.677999	0.56632	0.637187	0.0289743	1.24751	0.610199	0.289323	0.321907	0.0260769
		floor-rise farming	1.86329	0.677999	0.503395	0.652919	0.0289743	1.20882	0.610199	0.236389	0.336152	0.0260769
		manual dry cleaning manure	1.93045	0.677999	0.615548	0.60793	0.0289743	1.07291	0.610199	0.236389	0.201691	0.0246282
		mechanical dry clearing manure	1.91048	0.677999	0.56632	0.637187	0.0289743	1.20882	0.610199	0.236389	0.336152	0.0260769
		Water flushing feces	1.91048	0.677999	0.56632	0.637187	0.0289743	1.19687	0.610199	0.231458	0.329141	0.0260769
Hubei
	beef cattle
		bedding / litter	12.0654	2.44401	2.08863	5.51711	2.01568	7.57215	2.24849	0.872365	2.73797	1.71333
		Blistering feces	12.1471	2.44401	2.11107	5.57637	2.01568	7.90222	2.24849	1.09046	2.70885	1.85442
		floor-rise farming	11.9752	2.44401	1.8765	5.639	2.01568	7.75121	2.24849	0.881539	2.76676	1.85442
		manual dry cleaning manure	12.2355	2.44401	2.3207	5.45515	2.01568	6.14724	2.24849	1.09619	1.08924	1.71333
		mechanical dry clearing manure	12.1471	2.44401	2.11107	5.57637	2.01568	7.61012	2.24849	0.881539	2.76676	1.71333
		Water flushing feces	12.1471	2.44401	2.11107	5.57637	2.01568	7.71325	2.24849	0.872365	2.73797	1.85442
	broiler
		bedding / litter	0.0164986	0.0074414	0.00132712	0.00568139	0.00204865	0.00964149	0.00632519	0.000400684	0.00107183	0.00184378
		Blistering feces	0.0167284	0.0074414	0.00137065	0.00586775	0.00204865	0.0103208	0.00632519	0.000667807	0.00158643	0.00174135
		floor-rise farming	0.0166167	0.0074414	0.00121835	0.00590826	0.00204865	0.0102635	0.00632519	0.000550691	0.00164625	0.00174135
		manual dry cleaning manure	0.0166068	0.0074414	0.00147457	0.00564217	0.00204865	0.00981717	0.00632519	0.000550691	0.0010975	0.00184378
		mechanical dry clearing manure	0.0161417	0.0074414	0.00137065	0.00528098	0.00204865	0.0108122	0.00632519	0.000550691	0.002195	0.00174135
		Water flushing feces	0.0167284	0.0074414	0.00137065	0.00586775	0.00204865	0.0101979	0.00632519	0.000534246	0.00159709	0.00174135
	dairy cattle
		bedding / litter	11.3128	2.52786	1.80353	4.76402	2.21742	7.34093	2.32563	0.756421	2.37407	1.8848
		Blistering feces	11.3973	2.52786	1.82674	4.82532	2.21742	7.66001	2.32563	0.945527	2.34883	2.04002
		floor-rise farming	11.2486	2.52786	1.62377	4.87952	2.21742	7.53541	2.32563	0.76591	2.40385	2.04002
		manual dry cleaning manure	11.4597	2.52786	2.00392	4.71052	2.21742	6.40498	2.32563	0.761166	1.43338	1.8848
		mechanical dry clearing manure	11.3973	2.52786	1.82674	4.82532	2.21742	7.3802	2.32563	0.76591	2.40385	1.8848
		Water flushing feces	11.3973	2.52786	1.82674	4.82532	2.21742	7.49615	2.32563	0.756421	2.37407	2.04002
	layer
		bedding / litter	0.137562	0.0661452	0.0053385	0.0493578	0.0167207	0.0852219	0.0582077	0.00179646	0.010169	0.0150486
		Blistering feces	0.139575	0.0661452	0.00553496	0.0511741	0.0167207	0.0910679	0.0582077	0.00299411	0.0151518	0.0147142
		floor-rise farming	0.139134	0.0661452	0.00491996	0.0513481	0.0167207	0.0905199	0.0582077	0.00239529	0.0152027	0.0147142
		manual dry cleaning manure	0.137987	0.0661452	0.00593167	0.0491899	0.0167207	0.0882701	0.0562234	0.00231363	0.0146844	0.0150486
		mechanical dry clearing manure	0.134458	0.0661452	0.00553496	0.0460567	0.0167207	0.0925017	0.0562234	0.00179088	0.0202748	0.0142126
		Water flushing feces	0.139575	0.0661452	0.00553496	0.0511741	0.0167207	0.0905199	0.0582077	0.00239529	0.0152027	0.0147142
	pig
		bedding / litter	1.88429	0.677999	0.553994	0.623319	0.0289743	1.19687	0.610199	0.231458	0.329141	0.0260769
		Blistering feces	1.91048	0.677999	0.56632	0.637187	0.0289743	1.24751	0.610199	0.289323	0.321907	0.0260769
		floor-rise farming	1.86329	0.677999	0.503395	0.652919	0.0289743	1.20882	0.610199	0.236389	0.336152	0.0260769
		manual dry cleaning manure	1.93045	0.677999	0.615548	0.60793	0.0289743	1.07291	0.610199	0.236389	0.201691	0.0246282
		mechanical dry clearing manure	1.91048	0.677999	0.56632	0.637187	0.0289743	1.20882	0.610199	0.236389	0.336152	0.0260769
		Water flushing feces	1.91048	0.677999	0.56632	0.637187	0.0289743	1.19687	0.610199	0.231458	0.329141	0.0260769
Hunan
	beef cattle
		bedding / litter	12.0654	2.44401	2.08863	5.51711	2.01568	7.57215	2.24849	0.872365	2.73797	1.71333
		Blistering feces	12.1471	2.44401	2.11107	5.57637	2.01568	7.90222	2.24849	1.09046	2.70885	1.85442
		floor-rise farming	11.9752	2.44401	1.8765	5.639	2.01568	7.75121	2.24849	0.881539	2.76676	1.85442
		manual dry cleaning manure	12.2355	2.44401	2.3207	5.45515	2.01568	6.14724	2.24849	1.09619	1.08924	1.71333
		mechanical dry clearing manure	12.1471	2.44401	2.11107	5.57637	2.01568	7.61012	2.24849	0.881539	2.76676	1.71333
		Water flushing feces	12.1471	2.44401	2.11107	5.57637	2.01568	7.71325	2.24849	0.872365	2.73797	1.85442
	broiler
		bedding / litter	0.0164986	0.0074414	0.00132712	0.00568139	0.00204865	0.00964149	0.00632519	0.000400684	0.00107183	0.00184378
		Blistering feces	0.0167284	0.0074414	0.00137065	0.00586775	0.00204865	0.0103208	0.00632519	0.000667807	0.00158643	0.00174135
		floor-rise farming	0.0166167	0.0074414	0.00121835	0.00590826	0.00204865	0.0102635	0.00632519	0.000550691	0.00164625	0.00174135
		manual dry cleaning manure	0.0166068	0.0074414	0.00147457	0.00564217	0.00204865	0.00981717	0.00632519	0.000550691	0.0010975	0.00184378
		mechanical dry clearing manure	0.0161417	0.0074414	0.00137065	0.00528098	0.00204865	0.0108122	0.00632519	0.000550691	0.002195	0.00174135
		Water flushing feces	0.0167284	0.0074414	0.00137065	0.00586775	0.00204865	0.0101979	0.00632519	0.000534246	0.00159709	0.00174135
	dairy cattle
		bedding / litter	11.3128	2.52786	1.80353	4.76402	2.21742	7.34093	2.32563	0.756421	2.37407	1.8848
		Blistering feces	11.3973	2.52786	1.82674	4.82532	2.21742	7.66001	2.32563	0.945527	2.34883	2.04002
		floor-rise farming	11.2486	2.52786	1.62377	4.87952	2.21742	7.53541	2.32563	0.76591	2.40385	2.04002
		manual dry cleaning manure	11.4597	2.52786	2.00392	4.71052	2.21742	6.40498	2.32563	0.761166	1.43338	1.8848
		mechanical dry clearing manure	11.3973	2.52786	1.82674	4.82532	2.21742	7.3802	2.32563	0.76591	2.40385	1.8848
		Water flushing feces	11.3973	2.52786	1.82674	4.82532	2.21742	7.49615	2.32563	0.756421	2.37407	2.04002
	layer
		bedding / litter	0.137562	0.0661452	0.0053385	0.0493578	0.0167207	0.0852219	0.0582077	0.00179646	0.010169	0.0150486
		Blistering feces	0.139575	0.0661452	0.00553496	0.0511741	0.0167207	0.0910679	0.0582077	0.00299411	0.0151518	0.0147142
		floor-rise farming	0.139134	0.0661452	0.00491996	0.0513481	0.0167207	0.0905199	0.0582077	0.00239529	0.0152027	0.0147142
		manual dry cleaning manure	0.137987	0.0661452	0.00593167	0.0491899	0.0167207	0.0882701	0.0562234	0.00231363	0.0146844	0.0150486
		mechanical dry clearing manure	0.134458	0.0661452	0.00553496	0.0460567	0.0167207	0.0925017	0.0562234	0.00179088	0.0202748	0.0142126
		Water flushing feces	0.139575	0.0661452	0.00553496	0.0511741	0.0167207	0.0905199	0.0582077	0.00239529	0.0152027	0.0147142
	pig
		bedding / litter	1.88429	0.677999	0.553994	0.623319	0.0289743	1.19687	0.610199	0.231458	0.329141	0.0260769
		Blistering feces	1.91048	0.677999	0.56632	0.637187	0.0289743	1.24751	0.610199	0.289323	0.321907	0.0260769
		floor-rise farming	1.86329	0.677999	0.503395	0.652919	0.0289743	1.20882	0.610199	0.236389	0.336152	0.0260769
		manual dry cleaning manure	1.93045	0.677999	0.615548	0.60793	0.0289743	1.07291	0.610199	0.236389	0.201691	0.0246282
		mechanical dry clearing manure	1.91048	0.677999	0.56632	0.637187	0.0289743	1.20882	0.610199	0.236389	0.336152	0.0260769
		Water flushing feces	1.91048	0.677999	0.56632	0.637187	0.0289743	1.19687	0.610199	0.231458	0.329141	0.0260769
Inner Mongolia
	beef cattle
		bedding / litter	8.05371	1.63138	1.39417	3.68269	1.34547	5.05443	1.50087	0.582306	1.8276	1.14365
		Blistering feces	8.10824	1.63138	1.40914	3.72225	1.34547	5.27476	1.50087	0.727883	1.80817	1.23783
		floor-rise farming	7.99347	1.63138	1.25257	3.76405	1.34547	5.17396	1.50087	0.58843	1.84682	1.23783
		manual dry cleaning manure	8.16725	1.63138	1.54907	3.64133	1.34547	4.1033	1.50087	0.73171	0.72707	1.14365
		mechanical dry clearing manure	8.10824	1.63138	1.40914	3.72225	1.34547	5.07977	1.50087	0.58843	1.84682	1.14365
		Water flushing feces	8.10824	1.63138	1.40914	3.72225	1.34547	5.14861	1.50087	0.582306	1.8276	1.23783
	broiler
		bedding / litter	0.0172536	0.00778197	0.00138785	0.00594141	0.0021424	0.0100827	0.00661467	0.000419022	0.00112089	0.00192816
		Blistering feces	0.017494	0.00778197	0.00143338	0.0061363	0.0021424	0.0107931	0.00661467	0.00069837	0.00165904	0.00182104
		floor-rise farming	0.0173771	0.00778197	0.00127411	0.00617866	0.0021424	0.0107332	0.00661467	0.000575894	0.0017216	0.00182104
		manual dry cleaning manure	0.0173668	0.00778197	0.00154206	0.00590039	0.0021424	0.0102665	0.00661467	0.000575894	0.00114773	0.00192816
		mechanical dry clearing manure	0.0168804	0.00778197	0.00143338	0.00552267	0.0021424	0.0113071	0.00661467	0.000575894	0.00229546	0.00182104
		Water flushing feces	0.017494	0.00778197	0.00143338	0.0061363	0.0021424	0.0106646	0.00661467	0.000558696	0.00167018	0.00182104
	dairy cattle
		bedding / litter	18.6447	4.16616	2.9724	7.85158	3.65452	12.0986	3.83286	1.24666	3.91271	3.10634
		Blistering feces	18.7839	4.16616	3.01064	7.95261	3.65452	12.6244	3.83286	1.55832	3.8711	3.36216
		floor-rise farming	18.5387	4.16616	2.67613	8.04192	3.65452	12.4191	3.83286	1.2623	3.96179	3.36216
		manual dry cleaning manure	18.8867	4.16616	3.30267	7.7634	3.65452	10.556	3.83286	1.25448	2.36235	3.10634
		mechanical dry clearing manure	18.7839	4.16616	3.01064	7.95261	3.65452	12.1633	3.83286	1.2623	3.96179	3.10634
		Water flushing feces	18.7839	4.16616	3.01064	7.95261	3.65452	12.3544	3.83286	1.24666	3.91271	3.36216
	layer
		bedding / litter	0.145105	0.0697723	0.00563124	0.0520643	0.0176376	0.0898951	0.0613996	0.00189497	0.0107266	0.0158738
		Blistering feces	0.147229	0.0697723	0.00583847	0.0539803	0.0176376	0.0960617	0.0613996	0.00315829	0.0159827	0.0155211
		floor-rise farming	0.146763	0.0697723	0.00518975	0.0541638	0.0176376	0.0954836	0.0613996	0.00252663	0.0160363	0.0155211
		manual dry cleaning manure	0.145554	0.0697723	0.00625694	0.0518873	0.0176376	0.0931104	0.0593064	0.0024405	0.0154896	0.0158738
		mechanical dry clearing manure	0.141831	0.0697723	0.00583847	0.0485822	0.0176376	0.0975741	0.0593064	0.00188909	0.0213866	0.014992
		Water flushing feces	0.147229	0.0697723	0.00583847	0.0539803	0.0176376	0.0954836	0.0613996	0.00252663	0.0160363	0.0155211
	pig
		bedding / litter	1.38144	0.497067	0.406154	0.456979	0.0212422	0.877475	0.44736	0.169691	0.241306	0.019118
		Blistering feces	1.40065	0.497067	0.415191	0.467147	0.0212422	0.914595	0.44736	0.212114	0.236003	0.019118
		floor-rise farming	1.36605	0.497067	0.369059	0.47868	0.0212422	0.88623	0.44736	0.173306	0.246446	0.019118
		manual dry cleaning manure	1.41529	0.497067	0.451282	0.445697	0.0212422	0.78659	0.44736	0.173306	0.147867	0.0180559
		mechanical dry clearing manure	1.40065	0.497067	0.415191	0.467147	0.0212422	0.88623	0.44736	0.173306	0.246446	0.019118
		Water flushing feces	1.40065	0.497067	0.415191	0.467147	0.0212422	0.877475	0.44736	0.169691	0.241306	0.019118
Jiangsu
	beef cattle
		bedding / litter	10.9061	2.20917	1.88794	4.98699	1.822	6.84457	2.03244	0.788543	2.47489	1.5487
		Blistering feces	10.98	2.20917	1.90822	5.04056	1.822	7.14293	2.03244	0.985679	2.44857	1.67624
		floor-rise farming	10.8245	2.20917	1.6962	5.09717	1.822	7.00643	2.03244	0.796835	2.50091	1.67624
		manual dry cleaning manure	11.0599	2.20917	2.09771	4.93098	1.822	5.55658	2.03244	0.990861	0.984578	1.5487
		mechanical dry clearing manure	10.98	2.20917	1.90822	5.04056	1.822	6.87889	2.03244	0.796835	2.50091	1.5487
		Water flushing feces	10.98	2.20917	1.90822	5.04056	1.822	6.97211	2.03244	0.788543	2.47489	1.67624
	broiler
		bedding / litter	0.0237709	0.0107215	0.00191209	0.00818566	0.00295166	0.0138913	0.00911324	0.0005773	0.00154428	0.00265649
		Blistering feces	0.0241021	0.0107215	0.00197481	0.00845417	0.00295166	0.01487	0.00911324	0.000962166	0.00228571	0.00250891
		floor-rise farming	0.023941	0.0107215	0.00175539	0.00851254	0.00295166	0.0147875	0.00911324	0.000793428	0.0023719	0.00250891
		manual dry cleaning manure	0.0239268	0.0107215	0.00212454	0.00812915	0.00295166	0.0141444	0.00911324	0.000793428	0.00158126	0.00265649
		mechanical dry clearing manure	0.0232567	0.0107215	0.00197481	0.00760875	0.00295166	0.0155781	0.00911324	0.000793428	0.00316253	0.00250891
		Water flushing feces	0.0241021	0.0107215	0.00197481	0.00845417	0.00295166	0.0146929	0.00911324	0.000769733	0.00230106	0.00250891
	dairy cattle
		bedding / litter	18.4839	4.13023	2.94676	7.78387	3.62301	11.9942	3.79981	1.23591	3.87896	3.07956
		Blistering feces	18.6219	4.13023	2.98468	7.88402	3.62301	12.5156	3.79981	1.54488	3.83771	3.33317
		floor-rise farming	18.3789	4.13023	2.65305	7.97257	3.62301	12.312	3.79981	1.25141	3.92762	3.33317
		manual dry cleaning manure	18.7239	4.13023	3.27418	7.69645	3.62301	10.465	3.79981	1.24366	2.34198	3.07956
		mechanical dry clearing manure	18.6219	4.13023	2.98468	7.88402	3.62301	12.0584	3.79981	1.25141	3.92762	3.07956
		Water flushing feces	18.6219	4.13023	2.98468	7.88402	3.62301	12.2478	3.79981	1.23591	3.87896	3.33317
	layer
		bedding / litter	0.122286	0.0587996	0.00474566	0.0438765	0.0148638	0.0757578	0.0517437	0.00159696	0.00903973	0.0133775
		Blistering feces	0.124075	0.0587996	0.00492029	0.0454911	0.0148638	0.0809547	0.0517437	0.00266161	0.0134692	0.0130802
		floor-rise farming	0.123683	0.0587996	0.00437359	0.0456459	0.0148638	0.0804676	0.0517437	0.00212929	0.0135144	0.0130802
		manual dry cleaning manure	0.122664	0.0587996	0.00527295	0.0437273	0.0148638	0.0784675	0.0499797	0.0020567	0.0130537	0.0133775
		mechanical dry clearing manure	0.119526	0.0587996	0.00492029	0.040942	0.0148638	0.0822293	0.0499797	0.001592	0.0180233	0.0126343
		Water flushing feces	0.124075	0.0587996	0.00492029	0.0454911	0.0148638	0.0804676	0.0517437	0.00212929	0.0135144	0.0130802
	pig
		bedding / litter	1.56881	0.564486	0.461242	0.51896	0.0241233	0.996489	0.508037	0.192707	0.274035	0.021711
		Blistering feces	1.59062	0.564486	0.471504	0.530507	0.0241233	1.03864	0.508037	0.240883	0.268012	0.021711
		floor-rise farming	1.55133	0.564486	0.419115	0.543604	0.0241233	1.00643	0.508037	0.196812	0.279872	0.021711
		manual dry cleaning manure	1.60725	0.564486	0.512491	0.506148	0.0241233	0.893277	0.508037	0.196812	0.167923	0.0205048
		mechanical dry clearing manure	1.59062	0.564486	0.471504	0.530507	0.0241233	1.00643	0.508037	0.196812	0.279872	0.021711
		Water flushing feces	1.59062	0.564486	0.471504	0.530507	0.0241233	0.996489	0.508037	0.192707	0.274035	0.021711
Jiangxi
	beef cattle
		bedding / litter	10.9061	2.20917	1.88794	4.98699	1.822	6.84457	2.03244	0.788543	2.47489	1.5487
		Blistering feces	10.98	2.20917	1.90822	5.04056	1.822	7.14293	2.03244	0.985679	2.44857	1.67624
		floor-rise farming	10.8245	2.20917	1.6962	5.09717	1.822	7.00643	2.03244	0.796835	2.50091	1.67624
		manual dry cleaning manure	11.0599	2.20917	2.09771	4.93098	1.822	5.55658	2.03244	0.990861	0.984578	1.5487
		mechanical dry clearing manure	10.98	2.20917	1.90822	5.04056	1.822	6.87889	2.03244	0.796835	2.50091	1.5487
		Water flushing feces	10.98	2.20917	1.90822	5.04056	1.822	6.97211	2.03244	0.788543	2.47489	1.67624
	broiler
		bedding / litter	0.0237709	0.0107215	0.00191209	0.00818566	0.00295166	0.0138913	0.00911324	0.0005773	0.00154428	0.00265649
		Blistering feces	0.0241021	0.0107215	0.00197481	0.00845417	0.00295166	0.01487	0.00911324	0.000962166	0.00228571	0.00250891
		floor-rise farming	0.023941	0.0107215	0.00175539	0.00851254	0.00295166	0.0147875	0.00911324	0.000793428	0.0023719	0.00250891
		manual dry cleaning manure	0.0239268	0.0107215	0.00212454	0.00812915	0.00295166	0.0141444	0.00911324	0.000793428	0.00158126	0.00265649
		mechanical dry clearing manure	0.0232567	0.0107215	0.00197481	0.00760875	0.00295166	0.0155781	0.00911324	0.000793428	0.00316253	0.00250891
		Water flushing feces	0.0241021	0.0107215	0.00197481	0.00845417	0.00295166	0.0146929	0.00911324	0.000769733	0.00230106	0.00250891
	dairy cattle
		bedding / litter	18.4839	4.13023	2.94676	7.78387	3.62301	11.9942	3.79981	1.23591	3.87896	3.07956
		Blistering feces	18.6219	4.13023	2.98468	7.88402	3.62301	12.5156	3.79981	1.54488	3.83771	3.33317
		floor-rise farming	18.3789	4.13023	2.65305	7.97257	3.62301	12.312	3.79981	1.25141	3.92762	3.33317
		manual dry cleaning manure	18.7239	4.13023	3.27418	7.69645	3.62301	10.465	3.79981	1.24366	2.34198	3.07956
		mechanical dry clearing manure	18.6219	4.13023	2.98468	7.88402	3.62301	12.0584	3.79981	1.25141	3.92762	3.07956
		Water flushing feces	18.6219	4.13023	2.98468	7.88402	3.62301	12.2478	3.79981	1.23591	3.87896	3.33317
	layer
		bedding / litter	0.122286	0.0587996	0.00474566	0.0438765	0.0148638	0.0757578	0.0517437	0.00159696	0.00903973	0.0133775
		Blistering feces	0.124075	0.0587996	0.00492029	0.0454911	0.0148638	0.0809547	0.0517437	0.00266161	0.0134692	0.0130802
		floor-rise farming	0.123683	0.0587996	0.00437359	0.0456459	0.0148638	0.0804676	0.0517437	0.00212929	0.0135144	0.0130802
		manual dry cleaning manure	0.122664	0.0587996	0.00527295	0.0437273	0.0148638	0.0784675	0.0499797	0.0020567	0.0130537	0.0133775
		mechanical dry clearing manure	0.119526	0.0587996	0.00492029	0.040942	0.0148638	0.0822293	0.0499797	0.001592	0.0180233	0.0126343
		Water flushing feces	0.124075	0.0587996	0.00492029	0.0454911	0.0148638	0.0804676	0.0517437	0.00212929	0.0135144	0.0130802
	pig
		bedding / litter	1.56881	0.564486	0.461242	0.51896	0.0241233	0.996489	0.508037	0.192707	0.274035	0.021711
		Blistering feces	1.59062	0.564486	0.471504	0.530507	0.0241233	1.03864	0.508037	0.240883	0.268012	0.021711
		floor-rise farming	1.55133	0.564486	0.419115	0.543604	0.0241233	1.00643	0.508037	0.196812	0.279872	0.021711
		manual dry cleaning manure	1.60725	0.564486	0.512491	0.506148	0.0241233	0.893277	0.508037	0.196812	0.167923	0.0205048
		mechanical dry clearing manure	1.59062	0.564486	0.471504	0.530507	0.0241233	1.00643	0.508037	0.196812	0.279872	0.021711
		Water flushing feces	1.59062	0.564486	0.471504	0.530507	0.0241233	0.996489	0.508037	0.192707	0.274035	0.021711
Jilin
	beef cattle
		bedding / litter	6.27135	1.27034	1.08562	2.86767	1.04771	3.93584	1.16872	0.453437	1.42314	0.89055
		Blistering feces	6.31381	1.27034	1.09729	2.89848	1.04771	4.1074	1.16872	0.566796	1.408	0.963889
		floor-rise farming	6.22445	1.27034	0.975366	2.93103	1.04771	4.02891	1.16872	0.458205	1.4381	0.963889
		manual dry cleaning manure	6.35977	1.27034	1.20625	2.83547	1.04771	3.1952	1.16872	0.569776	0.566163	0.89055
		mechanical dry clearing manure	6.31381	1.27034	1.09729	2.89848	1.04771	3.95557	1.16872	0.458205	1.4381	0.89055
		Water flushing feces	6.31381	1.27034	1.09729	2.89848	1.04771	4.00918	1.16872	0.453437	1.42314	0.963889
	broiler
		bedding / litter	0.0226496	0.0102157	0.00182189	0.00779955	0.00281243	0.0132361	0.00868337	0.000550069	0.00147144	0.00253118
		Blistering feces	0.0229652	0.0102157	0.00188166	0.00805539	0.00281243	0.0141686	0.00868337	0.000916781	0.00217789	0.00239056
		floor-rise farming	0.0228117	0.0102157	0.00167258	0.008111	0.00281243	0.0140899	0.00868337	0.000756002	0.00226001	0.00239056
		manual dry cleaning manure	0.0227982	0.0102157	0.00202433	0.0077457	0.00281243	0.0134772	0.00868337	0.000756002	0.00150668	0.00253118
		mechanical dry clearing manure	0.0221597	0.0102157	0.00188166	0.00724985	0.00281243	0.0148433	0.00868337	0.000756002	0.00301335	0.00239056
		Water flushing feces	0.0229652	0.0102157	0.00188166	0.00805539	0.00281243	0.0139999	0.00868337	0.000733425	0.00219252	0.00239056
	dairy cattle
		bedding / litter	15.6745	3.50248	2.49889	6.6008	3.07235	10.1712	3.22228	1.04806	3.2894	2.61149
		Blistering feces	15.7916	3.50248	2.53104	6.68573	3.07235	10.6133	3.22228	1.31008	3.25442	2.82656
		floor-rise farming	15.5855	3.50248	2.24981	6.76082	3.07235	10.4407	3.22228	1.06121	3.33066	2.82656
		manual dry cleaning manure	15.878	3.50248	2.77654	6.52667	3.07235	8.87442	3.22228	1.05463	1.98602	2.61149
		mechanical dry clearing manure	15.7916	3.50248	2.53104	6.68573	3.07235	10.2256	3.22228	1.06121	3.33066	2.61149
		Water flushing feces	15.7916	3.50248	2.53104	6.68573	3.07235	10.3863	3.22228	1.04806	3.2894	2.82656
	layer
		bedding / litter	0.168951	0.0812382	0.00655665	0.0606203	0.020536	0.104668	0.0714896	0.00220638	0.0124894	0.0184824
		Blistering feces	0.171423	0.0812382	0.00679792	0.062851	0.020536	0.111848	0.0714896	0.0036773	0.0186092	0.0180717
		floor-rise farming	0.170882	0.0812382	0.0060426	0.0630648	0.020536	0.111175	0.0714896	0.00294184	0.0186716	0.0180717
		manual dry cleaning manure	0.169473	0.0812382	0.00728516	0.0604141	0.020536	0.108412	0.0690524	0.00284155	0.0180351	0.0184824
		mechanical dry clearing manure	0.165138	0.0812382	0.00679792	0.0565659	0.020536	0.113609	0.0690524	0.00219953	0.0249011	0.0174556
		Water flushing feces	0.171423	0.0812382	0.00679792	0.062851	0.020536	0.111175	0.0714896	0.00294184	0.0186716	0.0180717
	pig
		bedding / litter	2.17544	0.782762	0.639596	0.719633	0.0334514	1.38181	0.704486	0.267223	0.379999	0.0301062
		Blistering feces	2.20568	0.782762	0.653826	0.735644	0.0334514	1.44027	0.704486	0.334028	0.371648	0.0301062
		floor-rise farming	2.1512	0.782762	0.581179	0.753806	0.0334514	1.3956	0.704486	0.272915	0.388093	0.0301062
		manual dry cleaning manure	2.22874	0.782762	0.710662	0.701866	0.0334514	1.23869	0.704486	0.272915	0.232856	0.0284337
		mechanical dry clearing manure	2.20568	0.782762	0.653826	0.735644	0.0334514	1.3956	0.704486	0.272915	0.388093	0.0301062
		Water flushing feces	2.20568	0.782762	0.653826	0.735644	0.0334514	1.38181	0.704486	0.267223	0.379999	0.0301062
Liaoning
	beef cattle
		bedding / litter	6.27135	1.27034	1.08562	2.86767	1.04771	3.93584	1.16872	0.453437	1.42314	0.89055
		Blistering feces	6.31381	1.27034	1.09729	2.89848	1.04771	4.1074	1.16872	0.566796	1.408	0.963889
		floor-rise farming	6.22445	1.27034	0.975366	2.93103	1.04771	4.02891	1.16872	0.458205	1.4381	0.963889
		manual dry cleaning manure	6.35977	1.27034	1.20625	2.83547	1.04771	3.1952	1.16872	0.569776	0.566163	0.89055
		mechanical dry clearing manure	6.31381	1.27034	1.09729	2.89848	1.04771	3.95557	1.16872	0.458205	1.4381	0.89055
		Water flushing feces	6.31381	1.27034	1.09729	2.89848	1.04771	4.00918	1.16872	0.453437	1.42314	0.963889
	broiler
		bedding / litter	0.0226496	0.0102157	0.00182189	0.00779955	0.00281243	0.0132361	0.00868337	0.000550069	0.00147144	0.00253118
		Blistering feces	0.0229652	0.0102157	0.00188166	0.00805539	0.00281243	0.0141686	0.00868337	0.000916781	0.00217789	0.00239056
		floor-rise farming	0.0228117	0.0102157	0.00167258	0.008111	0.00281243	0.0140899	0.00868337	0.000756002	0.00226001	0.00239056
		manual dry cleaning manure	0.0227982	0.0102157	0.00202433	0.0077457	0.00281243	0.0134772	0.00868337	0.000756002	0.00150668	0.00253118
		mechanical dry clearing manure	0.0221597	0.0102157	0.00188166	0.00724985	0.00281243	0.0148433	0.00868337	0.000756002	0.00301335	0.00239056
		Water flushing feces	0.0229652	0.0102157	0.00188166	0.00805539	0.00281243	0.0139999	0.00868337	0.000733425	0.00219252	0.00239056
	dairy cattle
		bedding / litter	15.6745	3.50248	2.49889	6.6008	3.07235	10.1712	3.22228	1.04806	3.2894	2.61149
		Blistering feces	15.7916	3.50248	2.53104	6.68573	3.07235	10.6133	3.22228	1.31008	3.25442	2.82656
		floor-rise farming	15.5855	3.50248	2.24981	6.76082	3.07235	10.4407	3.22228	1.06121	3.33066	2.82656
		manual dry cleaning manure	15.878	3.50248	2.77654	6.52667	3.07235	8.87442	3.22228	1.05463	1.98602	2.61149
		mechanical dry clearing manure	15.7916	3.50248	2.53104	6.68573	3.07235	10.2256	3.22228	1.06121	3.33066	2.61149
		Water flushing feces	15.7916	3.50248	2.53104	6.68573	3.07235	10.3863	3.22228	1.04806	3.2894	2.82656
	layer
		bedding / litter	0.168951	0.0812382	0.00655665	0.0606203	0.020536	0.104668	0.0714896	0.00220638	0.0124894	0.0184824
		Blistering feces	0.171423	0.0812382	0.00679792	0.062851	0.020536	0.111848	0.0714896	0.0036773	0.0186092	0.0180717
		floor-rise farming	0.170882	0.0812382	0.0060426	0.0630648	0.020536	0.111175	0.0714896	0.00294184	0.0186716	0.0180717
		manual dry cleaning manure	0.169473	0.0812382	0.00728516	0.0604141	0.020536	0.108412	0.0690524	0.00284155	0.0180351	0.0184824
		mechanical dry clearing manure	0.165138	0.0812382	0.00679792	0.0565659	0.020536	0.113609	0.0690524	0.00219953	0.0249011	0.0174556
		Water flushing feces	0.171423	0.0812382	0.00679792	0.062851	0.020536	0.111175	0.0714896	0.00294184	0.0186716	0.0180717
	pig
		bedding / litter	2.17544	0.782762	0.639596	0.719633	0.0334514	1.38181	0.704486	0.267223	0.379999	0.0301062
		Blistering feces	2.20568	0.782762	0.653826	0.735644	0.0334514	1.44027	0.704486	0.334028	0.371648	0.0301062
		floor-rise farming	2.1512	0.782762	0.581179	0.753806	0.0334514	1.3956	0.704486	0.272915	0.388093	0.0301062
		manual dry cleaning manure	2.22874	0.782762	0.710662	0.701866	0.0334514	1.23869	0.704486	0.272915	0.232856	0.0284337
		mechanical dry clearing manure	2.20568	0.782762	0.653826	0.735644	0.0334514	1.3956	0.704486	0.272915	0.388093	0.0301062
		Water flushing feces	2.20568	0.782762	0.653826	0.735644	0.0334514	1.38181	0.704486	0.267223	0.379999	0.0301062
Ningxia
	beef cattle
		bedding / litter	8.95089	1.81312	1.54948	4.09294	1.49536	5.61749	1.66807	0.647175	2.0312	1.27105
		Blistering feces	9.0115	1.81312	1.56612	4.1369	1.49536	5.86236	1.66807	0.808969	2.0096	1.37573
		floor-rise farming	8.88394	1.81312	1.39211	4.18336	1.49536	5.75033	1.66807	0.653981	2.05256	1.37573
		manual dry cleaning manure	9.07708	1.81312	1.72164	4.04697	1.49536	4.56041	1.66807	0.813222	0.808065	1.27105
		mechanical dry clearing manure	9.0115	1.81312	1.56612	4.1369	1.49536	5.64566	1.66807	0.653981	2.05256	1.27105
		Water flushing feces	9.0115	1.81312	1.56612	4.1369	1.49536	5.72217	1.66807	0.647175	2.0312	1.37573
	broiler
		bedding / litter	0.0186622	0.00841726	0.00150115	0.00642644	0.0023173	0.0109059	0.00715467	0.00045323	0.00121239	0.00208557
		Blistering feces	0.0189222	0.00841726	0.00155039	0.00663724	0.0023173	0.0116742	0.00715467	0.000755383	0.00179448	0.00196971
		floor-rise farming	0.0187958	0.00841726	0.00137813	0.00668307	0.0023173	0.0116094	0.00715467	0.000622908	0.00186214	0.00196971
		manual dry cleaning manure	0.0187846	0.00841726	0.00166795	0.00638208	0.0023173	0.0111046	0.00715467	0.000622908	0.00124143	0.00208557
		mechanical dry clearing manure	0.0182585	0.00841726	0.00155039	0.00597352	0.0023173	0.0122301	0.00715467	0.000622908	0.00248285	0.00196971
		Water flushing feces	0.0189222	0.00841726	0.00155039	0.00663724	0.0023173	0.0115352	0.00715467	0.000604306	0.00180653	0.00196971
	dairy cattle
		bedding / litter	19.6773	4.3969	3.13703	8.28645	3.85693	12.7687	4.04515	1.3157	4.12941	3.27839
		Blistering feces	19.8243	4.3969	3.17739	8.39307	3.85693	13.3237	4.04515	1.64463	4.0855	3.54838
		floor-rise farming	19.5655	4.3969	2.82435	8.48733	3.85693	13.1069	4.04515	1.33221	4.18121	3.54838
		manual dry cleaning manure	19.9328	4.3969	3.48559	8.19338	3.85693	11.1407	4.04515	1.32396	2.49319	3.27839
		mechanical dry clearing manure	19.8243	4.3969	3.17739	8.39307	3.85693	12.837	4.04515	1.33221	4.18121	3.27839
		Water flushing feces	19.8243	4.3969	3.17739	8.39307	3.85693	13.0386	4.04515	1.3157	4.12941	3.54838
	layer
		bedding / litter	0.157883	0.0759162	0.00612712	0.056649	0.0191907	0.097811	0.0668063	0.00206184	0.0116712	0.0172716
		Blistering feces	0.160193	0.0759162	0.00635259	0.0587336	0.0191907	0.104521	0.0668063	0.0034364	0.0173901	0.0168878
		floor-rise farming	0.159687	0.0759162	0.00564675	0.0589334	0.0191907	0.103892	0.0668063	0.00274912	0.0174484	0.0168878
		manual dry cleaning manure	0.158371	0.0759162	0.00680791	0.0564563	0.0191907	0.101309	0.0645288	0.0026554	0.0168536	0.0172716
		mechanical dry clearing manure	0.15432	0.0759162	0.00635259	0.0528603	0.0191907	0.106166	0.0645288	0.00205543	0.0232699	0.0163121
		Water flushing feces	0.160193	0.0759162	0.00635259	0.0587336	0.0191907	0.103892	0.0668063	0.00274912	0.0174484	0.0168878
	pig
		bedding / litter	2.19789	0.79084	0.646196	0.727059	0.0337966	1.39607	0.711756	0.26998	0.38392	0.0304169
		Blistering feces	2.22845	0.79084	0.660573	0.743236	0.0337966	1.45513	0.711756	0.337475	0.375483	0.0304169
		floor-rise farming	2.1734	0.79084	0.587176	0.761585	0.0337966	1.41	0.711756	0.275731	0.392098	0.0304169
		manual dry cleaning manure	2.25174	0.79084	0.717996	0.709109	0.0337966	1.25147	0.711756	0.275731	0.235259	0.0287271
		mechanical dry clearing manure	2.22845	0.79084	0.660573	0.743236	0.0337966	1.41	0.711756	0.275731	0.392098	0.0304169
		Water flushing feces	2.22845	0.79084	0.660573	0.743236	0.0337966	1.39607	0.711756	0.26998	0.38392	0.0304169
Qinghai
	beef cattle
		bedding / litter	8.95089	1.81312	1.54948	4.09294	1.49536	5.61749	1.66807	0.647175	2.0312	1.27105
		Blistering feces	9.0115	1.81312	1.56612	4.1369	1.49536	5.86236	1.66807	0.808969	2.0096	1.37573
		floor-rise farming	8.88394	1.81312	1.39211	4.18336	1.49536	5.75033	1.66807	0.653981	2.05256	1.37573
		manual dry cleaning manure	9.07708	1.81312	1.72164	4.04697	1.49536	4.56041	1.66807	0.813222	0.808065	1.27105
		mechanical dry clearing manure	9.0115	1.81312	1.56612	4.1369	1.49536	5.64566	1.66807	0.653981	2.05256	1.27105
		Water flushing feces	9.0115	1.81312	1.56612	4.1369	1.49536	5.72217	1.66807	0.647175	2.0312	1.37573
	broiler
		bedding / litter	0.0186622	0.00841726	0.00150115	0.00642644	0.0023173	0.0109059	0.00715467	0.00045323	0.00121239	0.00208557
		Blistering feces	0.0189222	0.00841726	0.00155039	0.00663724	0.0023173	0.0116742	0.00715467	0.000755383	0.00179448	0.00196971
		floor-rise farming	0.0187958	0.00841726	0.00137813	0.00668307	0.0023173	0.0116094	0.00715467	0.000622908	0.00186214	0.00196971
		manual dry cleaning manure	0.0187846	0.00841726	0.00166795	0.00638208	0.0023173	0.0111046	0.00715467	0.000622908	0.00124143	0.00208557
		mechanical dry clearing manure	0.0182585	0.00841726	0.00155039	0.00597352	0.0023173	0.0122301	0.00715467	0.000622908	0.00248285	0.00196971
		Water flushing feces	0.0189222	0.00841726	0.00155039	0.00663724	0.0023173	0.0115352	0.00715467	0.000604306	0.00180653	0.00196971
	dairy cattle
		bedding / litter	19.6773	4.3969	3.13703	8.28645	3.85693	12.7687	4.04515	1.3157	4.12941	3.27839
		Blistering feces	19.8243	4.3969	3.17739	8.39307	3.85693	13.3237	4.04515	1.64463	4.0855	3.54838
		floor-rise farming	19.5655	4.3969	2.82435	8.48733	3.85693	13.1069	4.04515	1.33221	4.18121	3.54838
		manual dry cleaning manure	19.9328	4.3969	3.48559	8.19338	3.85693	11.1407	4.04515	1.32396	2.49319	3.27839
		mechanical dry clearing manure	19.8243	4.3969	3.17739	8.39307	3.85693	12.837	4.04515	1.33221	4.18121	3.27839
		Water flushing feces	19.8243	4.3969	3.17739	8.39307	3.85693	13.0386	4.04515	1.3157	4.12941	3.54838
	layer
		bedding / litter	0.157883	0.0759162	0.00612712	0.056649	0.0191907	0.097811	0.0668063	0.00206184	0.0116712	0.0172716
		Blistering feces	0.160193	0.0759162	0.00635259	0.0587336	0.0191907	0.104521	0.0668063	0.0034364	0.0173901	0.0168878
		floor-rise farming	0.159687	0.0759162	0.00564675	0.0589334	0.0191907	0.103892	0.0668063	0.00274912	0.0174484	0.0168878
		manual dry cleaning manure	0.158371	0.0759162	0.00680791	0.0564563	0.0191907	0.101309	0.0645288	0.0026554	0.0168536	0.0172716
		mechanical dry clearing manure	0.15432	0.0759162	0.00635259	0.0528603	0.0191907	0.106166	0.0645288	0.00205543	0.0232699	0.0163121
		Water flushing feces	0.160193	0.0759162	0.00635259	0.0587336	0.0191907	0.103892	0.0668063	0.00274912	0.0174484	0.0168878
	pig
		bedding / litter	2.19789	0.79084	0.646196	0.727059	0.0337966	1.39607	0.711756	0.26998	0.38392	0.0304169
		Blistering feces	2.22845	0.79084	0.660573	0.743236	0.0337966	1.45513	0.711756	0.337475	0.375483	0.0304169
		floor-rise farming	2.1734	0.79084	0.587176	0.761585	0.0337966	1.41	0.711756	0.275731	0.392098	0.0304169
		manual dry cleaning manure	2.25174	0.79084	0.717996	0.709109	0.0337966	1.25147	0.711756	0.275731	0.235259	0.0287271
		mechanical dry clearing manure	2.22845	0.79084	0.660573	0.743236	0.0337966	1.41	0.711756	0.275731	0.392098	0.0304169
		Water flushing feces	2.22845	0.79084	0.660573	0.743236	0.0337966	1.39607	0.711756	0.26998	0.38392	0.0304169
Shaanxi
	beef cattle
		bedding / litter	8.05371	1.63138	1.39417	3.68269	1.34547	5.05443	1.50087	0.582306	1.8276	1.14365
		Blistering feces	8.10824	1.63138	1.40914	3.72225	1.34547	5.27476	1.50087	0.727883	1.80817	1.23783
		floor-rise farming	7.99347	1.63138	1.25257	3.76405	1.34547	5.17396	1.50087	0.58843	1.84682	1.23783
		manual dry cleaning manure	8.16725	1.63138	1.54907	3.64133	1.34547	4.1033	1.50087	0.73171	0.72707	1.14365
		mechanical dry clearing manure	8.10824	1.63138	1.40914	3.72225	1.34547	5.07977	1.50087	0.58843	1.84682	1.14365
		Water flushing feces	8.10824	1.63138	1.40914	3.72225	1.34547	5.14861	1.50087	0.582306	1.8276	1.23783
	broiler
		bedding / litter	0.0172536	0.00778197	0.00138785	0.00594141	0.0021424	0.0100827	0.00661467	0.000419022	0.00112089	0.00192816
		Blistering feces	0.017494	0.00778197	0.00143338	0.0061363	0.0021424	0.0107931	0.00661467	0.00069837	0.00165904	0.00182104
		floor-rise farming	0.0173771	0.00778197	0.00127411	0.00617866	0.0021424	0.0107332	0.00661467	0.000575894	0.0017216	0.00182104
		manual dry cleaning manure	0.0173668	0.00778197	0.00154206	0.00590039	0.0021424	0.0102665	0.00661467	0.000575894	0.00114773	0.00192816
		mechanical dry clearing manure	0.0168804	0.00778197	0.00143338	0.00552267	0.0021424	0.0113071	0.00661467	0.000575894	0.00229546	0.00182104
		Water flushing feces	0.017494	0.00778197	0.00143338	0.0061363	0.0021424	0.0106646	0.00661467	0.000558696	0.00167018	0.00182104
	dairy cattle
		bedding / litter	18.6447	4.16616	2.9724	7.85158	3.65452	12.0986	3.83286	1.24666	3.91271	3.10634
		Blistering feces	18.7839	4.16616	3.01064	7.95261	3.65452	12.6244	3.83286	1.55832	3.8711	3.36216
		floor-rise farming	18.5387	4.16616	2.67613	8.04192	3.65452	12.4191	3.83286	1.2623	3.96179	3.36216
		manual dry cleaning manure	18.8867	4.16616	3.30267	7.7634	3.65452	10.556	3.83286	1.25448	2.36235	3.10634
		mechanical dry clearing manure	18.7839	4.16616	3.01064	7.95261	3.65452	12.1633	3.83286	1.2623	3.96179	3.10634
		Water flushing feces	18.7839	4.16616	3.01064	7.95261	3.65452	12.3544	3.83286	1.24666	3.91271	3.36216
	layer
		bedding / litter	0.145105	0.0697723	0.00563124	0.0520643	0.0176376	0.0898951	0.0613996	0.00189497	0.0107266	0.0158738
		Blistering feces	0.147229	0.0697723	0.00583847	0.0539803	0.0176376	0.0960617	0.0613996	0.00315829	0.0159827	0.0155211
		floor-rise farming	0.146763	0.0697723	0.00518975	0.0541638	0.0176376	0.0954836	0.0613996	0.00252663	0.0160363	0.0155211
		manual dry cleaning manure	0.145554	0.0697723	0.00625694	0.0518873	0.0176376	0.0931104	0.0593064	0.0024405	0.0154896	0.0158738
		mechanical dry clearing manure	0.141831	0.0697723	0.00583847	0.0485822	0.0176376	0.0975741	0.0593064	0.00188909	0.0213866	0.014992
		Water flushing feces	0.147229	0.0697723	0.00583847	0.0539803	0.0176376	0.0954836	0.0613996	0.00252663	0.0160363	0.0155211
	pig
		bedding / litter	1.38144	0.497067	0.406154	0.456979	0.0212422	0.877475	0.44736	0.169691	0.241306	0.019118
		Blistering feces	1.40065	0.497067	0.415191	0.467147	0.0212422	0.914595	0.44736	0.212114	0.236003	0.019118
		floor-rise farming	1.36605	0.497067	0.369059	0.47868	0.0212422	0.88623	0.44736	0.173306	0.246446	0.019118
		manual dry cleaning manure	1.41529	0.497067	0.451282	0.445697	0.0212422	0.78659	0.44736	0.173306	0.147867	0.0180559
		mechanical dry clearing manure	1.40065	0.497067	0.415191	0.467147	0.0212422	0.88623	0.44736	0.173306	0.246446	0.019118
		Water flushing feces	1.40065	0.497067	0.415191	0.467147	0.0212422	0.877475	0.44736	0.169691	0.241306	0.019118
Shandong
	beef cattle
		bedding / litter	10.9061	2.20917	1.88794	4.98699	1.822	6.84457	2.03244	0.788543	2.47489	1.5487
		Blistering feces	10.98	2.20917	1.90822	5.04056	1.822	7.14293	2.03244	0.985679	2.44857	1.67624
		floor-rise farming	10.8245	2.20917	1.6962	5.09717	1.822	7.00643	2.03244	0.796835	2.50091	1.67624
		manual dry cleaning manure	11.0599	2.20917	2.09771	4.93098	1.822	5.55658	2.03244	0.990861	0.984578	1.5487
		mechanical dry clearing manure	10.98	2.20917	1.90822	5.04056	1.822	6.87889	2.03244	0.796835	2.50091	1.5487
		Water flushing feces	10.98	2.20917	1.90822	5.04056	1.822	6.97211	2.03244	0.788543	2.47489	1.67624
	broiler
		bedding / litter	0.0237709	0.0107215	0.00191209	0.00818566	0.00295166	0.0138913	0.00911324	0.0005773	0.00154428	0.00265649
		Blistering feces	0.0241021	0.0107215	0.00197481	0.00845417	0.00295166	0.01487	0.00911324	0.000962166	0.00228571	0.00250891
		floor-rise farming	0.023941	0.0107215	0.00175539	0.00851254	0.00295166	0.0147875	0.00911324	0.000793428	0.0023719	0.00250891
		manual dry cleaning manure	0.0239268	0.0107215	0.00212454	0.00812915	0.00295166	0.0141444	0.00911324	0.000793428	0.00158126	0.00265649
		mechanical dry clearing manure	0.0232567	0.0107215	0.00197481	0.00760875	0.00295166	0.0155781	0.00911324	0.000793428	0.00316253	0.00250891
		Water flushing feces	0.0241021	0.0107215	0.00197481	0.00845417	0.00295166	0.0146929	0.00911324	0.000769733	0.00230106	0.00250891
	dairy cattle
		bedding / litter	18.4839	4.13023	2.94676	7.78387	3.62301	11.9942	3.79981	1.23591	3.87896	3.07956
		Blistering feces	18.6219	4.13023	2.98468	7.88402	3.62301	12.5156	3.79981	1.54488	3.83771	3.33317
		floor-rise farming	18.3789	4.13023	2.65305	7.97257	3.62301	12.312	3.79981	1.25141	3.92762	3.33317
		manual dry cleaning manure	18.7239	4.13023	3.27418	7.69645	3.62301	10.465	3.79981	1.24366	2.34198	3.07956
		mechanical dry clearing manure	18.6219	4.13023	2.98468	7.88402	3.62301	12.0584	3.79981	1.25141	3.92762	3.07956
		Water flushing feces	18.6219	4.13023	2.98468	7.88402	3.62301	12.2478	3.79981	1.23591	3.87896	3.33317
	layer
		bedding / litter	0.122286	0.0587996	0.00474566	0.0438765	0.0148638	0.0757578	0.0517437	0.00159696	0.00903973	0.0133775
		Blistering feces	0.124075	0.0587996	0.00492029	0.0454911	0.0148638	0.0809547	0.0517437	0.00266161	0.0134692	0.0130802
		floor-rise farming	0.123683	0.0587996	0.00437359	0.0456459	0.0148638	0.0804676	0.0517437	0.00212929	0.0135144	0.0130802
		manual dry cleaning manure	0.122664	0.0587996	0.00527295	0.0437273	0.0148638	0.0784675	0.0499797	0.0020567	0.0130537	0.0133775
		mechanical dry clearing manure	0.119526	0.0587996	0.00492029	0.040942	0.0148638	0.0822293	0.0499797	0.001592	0.0180233	0.0126343
		Water flushing feces	0.124075	0.0587996	0.00492029	0.0454911	0.0148638	0.0804676	0.0517437	0.00212929	0.0135144	0.0130802
	pig
		bedding / litter	1.56881	0.564486	0.461242	0.51896	0.0241233	0.996489	0.508037	0.192707	0.274035	0.021711
		Blistering feces	1.59062	0.564486	0.471504	0.530507	0.0241233	1.03864	0.508037	0.240883	0.268012	0.021711
		floor-rise farming	1.55133	0.564486	0.419115	0.543604	0.0241233	1.00643	0.508037	0.196812	0.279872	0.021711
		manual dry cleaning manure	1.60725	0.564486	0.512491	0.506148	0.0241233	0.893277	0.508037	0.196812	0.167923	0.0205048
		mechanical dry clearing manure	1.59062	0.564486	0.471504	0.530507	0.0241233	1.00643	0.508037	0.196812	0.279872	0.021711
		Water flushing feces	1.59062	0.564486	0.471504	0.530507	0.0241233	0.996489	0.508037	0.192707	0.274035	0.021711
Shanghai
	beef cattle
		bedding / litter	10.9061	2.20917	1.88794	4.98699	1.822	6.84457	2.03244	0.788543	2.47489	1.5487
		Blistering feces	10.98	2.20917	1.90822	5.04056	1.822	7.14293	2.03244	0.985679	2.44857	1.67624
		floor-rise farming	10.8245	2.20917	1.6962	5.09717	1.822	7.00643	2.03244	0.796835	2.50091	1.67624
		manual dry cleaning manure	11.0599	2.20917	2.09771	4.93098	1.822	5.55658	2.03244	0.990861	0.984578	1.5487
		mechanical dry clearing manure	10.98	2.20917	1.90822	5.04056	1.822	6.87889	2.03244	0.796835	2.50091	1.5487
		Water flushing feces	10.98	2.20917	1.90822	5.04056	1.822	6.97211	2.03244	0.788543	2.47489	1.67624
	broiler
		bedding / litter	0.0237709	0.0107215	0.00191209	0.00818566	0.00295166	0.0138913	0.00911324	0.0005773	0.00154428	0.00265649
		Blistering feces	0.0241021	0.0107215	0.00197481	0.00845417	0.00295166	0.01487	0.00911324	0.000962166	0.00228571	0.00250891
		floor-rise farming	0.023941	0.0107215	0.00175539	0.00851254	0.00295166	0.0147875	0.00911324	0.000793428	0.0023719	0.00250891
		manual dry cleaning manure	0.0239268	0.0107215	0.00212454	0.00812915	0.00295166	0.0141444	0.00911324	0.000793428	0.00158126	0.00265649
		mechanical dry clearing manure	0.0232567	0.0107215	0.00197481	0.00760875	0.00295166	0.0155781	0.00911324	0.000793428	0.00316253	0.00250891
		Water flushing feces	0.0241021	0.0107215	0.00197481	0.00845417	0.00295166	0.0146929	0.00911324	0.000769733	0.00230106	0.00250891
	dairy cattle
		bedding / litter	18.4839	4.13023	2.94676	7.78387	3.62301	11.9942	3.79981	1.23591	3.87896	3.07956
		Blistering feces	18.6219	4.13023	2.98468	7.88402	3.62301	12.5156	3.79981	1.54488	3.83771	3.33317
		floor-rise farming	18.3789	4.13023	2.65305	7.97257	3.62301	12.312	3.79981	1.25141	3.92762	3.33317
		manual dry cleaning manure	18.7239	4.13023	3.27418	7.69645	3.62301	10.465	3.79981	1.24366	2.34198	3.07956
		mechanical dry clearing manure	18.6219	4.13023	2.98468	7.88402	3.62301	12.0584	3.79981	1.25141	3.92762	3.07956
		Water flushing feces	18.6219	4.13023	2.98468	7.88402	3.62301	12.2478	3.79981	1.23591	3.87896	3.33317
	layer
		bedding / litter	0.122286	0.0587996	0.00474566	0.0438765	0.0148638	0.0757578	0.0517437	0.00159696	0.00903973	0.0133775
		Blistering feces	0.124075	0.0587996	0.00492029	0.0454911	0.0148638	0.0809547	0.0517437	0.00266161	0.0134692	0.0130802
		floor-rise farming	0.123683	0.0587996	0.00437359	0.0456459	0.0148638	0.0804676	0.0517437	0.00212929	0.0135144	0.0130802
		manual dry cleaning manure	0.122664	0.0587996	0.00527295	0.0437273	0.0148638	0.0784675	0.0499797	0.0020567	0.0130537	0.0133775
		mechanical dry clearing manure	0.119526	0.0587996	0.00492029	0.040942	0.0148638	0.0822293	0.0499797	0.001592	0.0180233	0.0126343
		Water flushing feces	0.124075	0.0587996	0.00492029	0.0454911	0.0148638	0.0804676	0.0517437	0.00212929	0.0135144	0.0130802
	pig
		bedding / litter	1.56881	0.564486	0.461242	0.51896	0.0241233	0.996489	0.508037	0.192707	0.274035	0.021711
		Blistering feces	1.59062	0.564486	0.471504	0.530507	0.0241233	1.03864	0.508037	0.240883	0.268012	0.021711
		floor-rise farming	1.55133	0.564486	0.419115	0.543604	0.0241233	1.00643	0.508037	0.196812	0.279872	0.021711
		manual dry cleaning manure	1.60725	0.564486	0.512491	0.506148	0.0241233	0.893277	0.508037	0.196812	0.167923	0.0205048
		mechanical dry clearing manure	1.59062	0.564486	0.471504	0.530507	0.0241233	1.00643	0.508037	0.196812	0.279872	0.021711
		Water flushing feces	1.59062	0.564486	0.471504	0.530507	0.0241233	0.996489	0.508037	0.192707	0.274035	0.021711
Shanxi
	beef cattle
		bedding / litter	8.95089	1.81312	1.54948	4.09294	1.49536	5.61749	1.66807	0.647175	2.0312	1.27105
		Blistering feces	9.0115	1.81312	1.56612	4.1369	1.49536	5.86236	1.66807	0.808969	2.0096	1.37573
		floor-rise farming	8.88394	1.81312	1.39211	4.18336	1.49536	5.75033	1.66807	0.653981	2.05256	1.37573
		manual dry cleaning manure	9.07708	1.81312	1.72164	4.04697	1.49536	4.56041	1.66807	0.813222	0.808065	1.27105
		mechanical dry clearing manure	9.0115	1.81312	1.56612	4.1369	1.49536	5.64566	1.66807	0.653981	2.05256	1.27105
		Water flushing feces	9.0115	1.81312	1.56612	4.1369	1.49536	5.72217	1.66807	0.647175	2.0312	1.37573
	broiler
		bedding / litter	0.0186622	0.00841726	0.00150115	0.00642644	0.0023173	0.0109059	0.00715467	0.00045323	0.00121239	0.00208557
		Blistering feces	0.0189222	0.00841726	0.00155039	0.00663724	0.0023173	0.0116742	0.00715467	0.000755383	0.00179448	0.00196971
		floor-rise farming	0.0187958	0.00841726	0.00137813	0.00668307	0.0023173	0.0116094	0.00715467	0.000622908	0.00186214	0.00196971
		manual dry cleaning manure	0.0187846	0.00841726	0.00166795	0.00638208	0.0023173	0.0111046	0.00715467	0.000622908	0.00124143	0.00208557
		mechanical dry clearing manure	0.0182585	0.00841726	0.00155039	0.00597352	0.0023173	0.0122301	0.00715467	0.000622908	0.00248285	0.00196971
		Water flushing feces	0.0189222	0.00841726	0.00155039	0.00663724	0.0023173	0.0115352	0.00715467	0.000604306	0.00180653	0.00196971
	dairy cattle
		bedding / litter	19.6773	4.3969	3.13703	8.28645	3.85693	12.7687	4.04515	1.3157	4.12941	3.27839
		Blistering feces	19.8243	4.3969	3.17739	8.39307	3.85693	13.3237	4.04515	1.64463	4.0855	3.54838
		floor-rise farming	19.5655	4.3969	2.82435	8.48733	3.85693	13.1069	4.04515	1.33221	4.18121	3.54838
		manual dry cleaning manure	19.9328	4.3969	3.48559	8.19338	3.85693	11.1407	4.04515	1.32396	2.49319	3.27839
		mechanical dry clearing manure	19.8243	4.3969	3.17739	8.39307	3.85693	12.837	4.04515	1.33221	4.18121	3.27839
		Water flushing feces	19.8243	4.3969	3.17739	8.39307	3.85693	13.0386	4.04515	1.3157	4.12941	3.54838
	layer
		bedding / litter	0.157883	0.0759162	0.00612712	0.056649	0.0191907	0.097811	0.0668063	0.00206184	0.0116712	0.0172716
		Blistering feces	0.160193	0.0759162	0.00635259	0.0587336	0.0191907	0.104521	0.0668063	0.0034364	0.0173901	0.0168878
		floor-rise farming	0.159687	0.0759162	0.00564675	0.0589334	0.0191907	0.103892	0.0668063	0.00274912	0.0174484	0.0168878
		manual dry cleaning manure	0.158371	0.0759162	0.00680791	0.0564563	0.0191907	0.101309	0.0645288	0.0026554	0.0168536	0.0172716
		mechanical dry clearing manure	0.15432	0.0759162	0.00635259	0.0528603	0.0191907	0.106166	0.0645288	0.00205543	0.0232699	0.0163121
		Water flushing feces	0.160193	0.0759162	0.00635259	0.0587336	0.0191907	0.103892	0.0668063	0.00274912	0.0174484	0.0168878
	pig
		bedding / litter	2.19789	0.79084	0.646196	0.727059	0.0337966	1.39607	0.711756	0.26998	0.38392	0.0304169
		Blistering feces	2.22845	0.79084	0.660573	0.743236	0.0337966	1.45513	0.711756	0.337475	0.375483	0.0304169
		floor-rise farming	2.1734	0.79084	0.587176	0.761585	0.0337966	1.41	0.711756	0.275731	0.392098	0.0304169
		manual dry cleaning manure	2.25174	0.79084	0.717996	0.709109	0.0337966	1.25147	0.711756	0.275731	0.235259	0.0287271
		mechanical dry clearing manure	2.22845	0.79084	0.660573	0.743236	0.0337966	1.41	0.711756	0.275731	0.392098	0.0304169
		Water flushing feces	2.22845	0.79084	0.660573	0.743236	0.0337966	1.39607	0.711756	0.26998	0.38392	0.0304169
Sichuan
	beef cattle
		bedding / litter	12.3227	2.49612	2.13317	5.63475	2.05866	7.73362	2.29643	0.890967	2.79635	1.74986
		Blistering feces	12.4061	2.49612	2.15608	5.69528	2.05866	8.07073	2.29643	1.11371	2.76662	1.89397
		floor-rise farming	12.2305	2.49612	1.91652	5.75925	2.05866	7.9165	2.29643	0.900337	2.82576	1.89397
		manual dry cleaning manure	12.4964	2.49612	2.37019	5.57147	2.05866	6.27833	2.29643	1.11957	1.11247	1.74986
		mechanical dry clearing manure	12.4061	2.49612	2.15608	5.69528	2.05866	7.77239	2.29643	0.900337	2.82576	1.74986
		Water flushing feces	12.4061	2.49612	2.15608	5.69528	2.05866	7.87772	2.29643	0.890967	2.79635	1.89397
	broiler
		bedding / litter	0.027219	0.0122767	0.00218945	0.00937304	0.00337981	0.0159063	0.0104352	0.00066104	0.00176829	0.00304183
		Blistering feces	0.0275982	0.0122767	0.00226127	0.0096805	0.00337981	0.017027	0.0104352	0.00110173	0.00261726	0.00287284
		floor-rise farming	0.0274138	0.0122767	0.00201001	0.00974733	0.00337981	0.0169325	0.0104352	0.000908519	0.00271595	0.00287284
		manual dry cleaning manure	0.0273975	0.0122767	0.00243272	0.00930833	0.00337981	0.0161962	0.0104352	0.000908519	0.00181064	0.00304183
		mechanical dry clearing manure	0.0266302	0.0122767	0.00226127	0.00871245	0.00337981	0.0178378	0.0104352	0.000908519	0.00362127	0.00287284
		Water flushing feces	0.0275982	0.0122767	0.00226127	0.0096805	0.00337981	0.0168242	0.0104352	0.000881387	0.00263485	0.00287284
	dairy cattle
		bedding / litter	10.687	2.38802	1.70376	4.50048	2.09475	6.93484	2.19698	0.714577	2.24274	1.78054
		Blistering feces	10.7668	2.38802	1.72568	4.55839	2.09475	7.23626	2.19698	0.893221	2.21889	1.92717
		floor-rise farming	10.6263	2.38802	1.53394	4.60959	2.09475	7.11857	2.19698	0.723541	2.27088	1.92717
		manual dry cleaning manure	10.8258	2.38802	1.89307	4.44994	2.09475	6.05066	2.19698	0.719059	1.35409	1.78054
		mechanical dry clearing manure	10.7668	2.38802	1.72568	4.55839	2.09475	6.97193	2.19698	0.723541	2.27088	1.78054
		Water flushing feces	10.7668	2.38802	1.72568	4.55839	2.09475	7.08147	2.19698	0.714577	2.24274	1.92717
	layer
		bedding / litter	0.110102	0.0529412	0.00427283	0.0395049	0.0133829	0.0682098	0.0465882	0.00143785	0.00813906	0.0120446
		Blistering feces	0.111713	0.0529412	0.00443006	0.0409587	0.0133829	0.0728888	0.0465882	0.00239642	0.0121272	0.011777
		floor-rise farming	0.11136	0.0529412	0.00393783	0.041098	0.0133829	0.0724502	0.0465882	0.00191714	0.0121679	0.011777
		manual dry cleaning manure	0.110442	0.0529412	0.00474758	0.0393706	0.0133829	0.0706495	0.045	0.00185178	0.0117531	0.0120446
		mechanical dry clearing manure	0.107617	0.0529412	0.00443006	0.0368628	0.0133829	0.0740364	0.045	0.00143338	0.0162275	0.0113755
		Water flushing feces	0.111713	0.0529412	0.00443006	0.0409587	0.0133829	0.0724502	0.0465882	0.00191714	0.0121679	0.011777
	pig
		bedding / litter	2.10102	0.755985	0.617716	0.695016	0.0323071	1.33454	0.680387	0.258082	0.367	0.0290764
		Blistering feces	2.13023	0.755985	0.63146	0.71048	0.0323071	1.391	0.680387	0.322602	0.358935	0.0290764
		floor-rise farming	2.07761	0.755985	0.561298	0.72802	0.0323071	1.34786	0.680387	0.263579	0.374817	0.0290764
		manual dry cleaning manure	2.1525	0.755985	0.686351	0.677857	0.0323071	1.19632	0.680387	0.263579	0.22489	0.027461
		mechanical dry clearing manure	2.13023	0.755985	0.63146	0.71048	0.0323071	1.34786	0.680387	0.263579	0.374817	0.0290764
		Water flushing feces	2.13023	0.755985	0.63146	0.71048	0.0323071	1.33454	0.680387	0.258082	0.367	0.0290764
Tianjin
	beef cattle
		bedding / litter	8.05371	1.63138	1.39417	3.68269	1.34547	5.05443	1.50087	0.582306	1.8276	1.14365
		Blistering feces	8.10824	1.63138	1.40914	3.72225	1.34547	5.27476	1.50087	0.727883	1.80817	1.23783
		floor-rise farming	7.99347	1.63138	1.25257	3.76405	1.34547	5.17396	1.50087	0.58843	1.84682	1.23783
		manual dry cleaning manure	8.16725	1.63138	1.54907	3.64133	1.34547	4.1033	1.50087	0.73171	0.72707	1.14365
		mechanical dry clearing manure	8.10824	1.63138	1.40914	3.72225	1.34547	5.07977	1.50087	0.58843	1.84682	1.14365
		Water flushing feces	8.10824	1.63138	1.40914	3.72225	1.34547	5.14861	1.50087	0.582306	1.8276	1.23783
	broiler
		bedding / litter	0.0172536	0.00778197	0.00138785	0.00594141	0.0021424	0.0100827	0.00661467	0.000419022	0.00112089	0.00192816
		Blistering feces	0.017494	0.00778197	0.00143338	0.0061363	0.0021424	0.0107931	0.00661467	0.00069837	0.00165904	0.00182104
		floor-rise farming	0.0173771	0.00778197	0.00127411	0.00617866	0.0021424	0.0107332	0.00661467	0.000575894	0.0017216	0.00182104
		manual dry cleaning manure	0.0173668	0.00778197	0.00154206	0.00590039	0.0021424	0.0102665	0.00661467	0.000575894	0.00114773	0.00192816
		mechanical dry clearing manure	0.0168804	0.00778197	0.00143338	0.00552267	0.0021424	0.0113071	0.00661467	0.000575894	0.00229546	0.00182104
		Water flushing feces	0.017494	0.00778197	0.00143338	0.0061363	0.0021424	0.0106646	0.00661467	0.000558696	0.00167018	0.00182104
	dairy cattle
		bedding / litter	18.6447	4.16616	2.9724	7.85158	3.65452	12.0986	3.83286	1.24666	3.91271	3.10634
		Blistering feces	18.7839	4.16616	3.01064	7.95261	3.65452	12.6244	3.83286	1.55832	3.8711	3.36216
		floor-rise farming	18.5387	4.16616	2.67613	8.04192	3.65452	12.4191	3.83286	1.2623	3.96179	3.36216
		manual dry cleaning manure	18.8867	4.16616	3.30267	7.7634	3.65452	10.556	3.83286	1.25448	2.36235	3.10634
		mechanical dry clearing manure	18.7839	4.16616	3.01064	7.95261	3.65452	12.1633	3.83286	1.2623	3.96179	3.10634
		Water flushing feces	18.7839	4.16616	3.01064	7.95261	3.65452	12.3544	3.83286	1.24666	3.91271	3.36216
	layer
		bedding / litter	0.145105	0.0697723	0.00563124	0.0520643	0.0176376	0.0898951	0.0613996	0.00189497	0.0107266	0.0158738
		Blistering feces	0.147229	0.0697723	0.00583847	0.0539803	0.0176376	0.0960617	0.0613996	0.00315829	0.0159827	0.0155211
		floor-rise farming	0.146763	0.0697723	0.00518975	0.0541638	0.0176376	0.0954836	0.0613996	0.00252663	0.0160363	0.0155211
		manual dry cleaning manure	0.145554	0.0697723	0.00625694	0.0518873	0.0176376	0.0931104	0.0593064	0.0024405	0.0154896	0.0158738
		mechanical dry clearing manure	0.141831	0.0697723	0.00583847	0.0485822	0.0176376	0.0975741	0.0593064	0.00188909	0.0213866	0.014992
		Water flushing feces	0.147229	0.0697723	0.00583847	0.0539803	0.0176376	0.0954836	0.0613996	0.00252663	0.0160363	0.0155211
	pig
		bedding / litter	1.38144	0.497067	0.406154	0.456979	0.0212422	0.877475	0.44736	0.169691	0.241306	0.019118
		Blistering feces	1.40065	0.497067	0.415191	0.467147	0.0212422	0.914595	0.44736	0.212114	0.236003	0.019118
		floor-rise farming	1.36605	0.497067	0.369059	0.47868	0.0212422	0.88623	0.44736	0.173306	0.246446	0.019118
		manual dry cleaning manure	1.41529	0.497067	0.451282	0.445697	0.0212422	0.78659	0.44736	0.173306	0.147867	0.0180559
		mechanical dry clearing manure	1.40065	0.497067	0.415191	0.467147	0.0212422	0.88623	0.44736	0.173306	0.246446	0.019118
		Water flushing feces	1.40065	0.497067	0.415191	0.467147	0.0212422	0.877475	0.44736	0.169691	0.241306	0.019118
Tibet
	beef cattle
		bedding / litter	12.3227	2.49612	2.13317	5.63475	2.05866	7.73362	2.29643	0.890967	2.79635	1.74986
		Blistering feces	12.4061	2.49612	2.15608	5.69528	2.05866	8.07073	2.29643	1.11371	2.76662	1.89397
		floor-rise farming	12.2305	2.49612	1.91652	5.75925	2.05866	7.9165	2.29643	0.900337	2.82576	1.89397
		manual dry cleaning manure	12.4964	2.49612	2.37019	5.57147	2.05866	6.27833	2.29643	1.11957	1.11247	1.74986
		mechanical dry clearing manure	12.4061	2.49612	2.15608	5.69528	2.05866	7.77239	2.29643	0.900337	2.82576	1.74986
		Water flushing feces	12.4061	2.49612	2.15608	5.69528	2.05866	7.87772	2.29643	0.890967	2.79635	1.89397
	broiler
		bedding / litter	0.027219	0.0122767	0.00218945	0.00937304	0.00337981	0.0159063	0.0104352	0.00066104	0.00176829	0.00304183
		Blistering feces	0.0275982	0.0122767	0.00226127	0.0096805	0.00337981	0.017027	0.0104352	0.00110173	0.00261726	0.00287284
		floor-rise farming	0.0274138	0.0122767	0.00201001	0.00974733	0.00337981	0.0169325	0.0104352	0.000908519	0.00271595	0.00287284
		manual dry cleaning manure	0.0273975	0.0122767	0.00243272	0.00930833	0.00337981	0.0161962	0.0104352	0.000908519	0.00181064	0.00304183
		mechanical dry clearing manure	0.0266302	0.0122767	0.00226127	0.00871245	0.00337981	0.0178378	0.0104352	0.000908519	0.00362127	0.00287284
		Water flushing feces	0.0275982	0.0122767	0.00226127	0.0096805	0.00337981	0.0168242	0.0104352	0.000881387	0.00263485	0.00287284
	dairy cattle
		bedding / litter	10.687	2.38802	1.70376	4.50048	2.09475	6.93484	2.19698	0.714577	2.24274	1.78054
		Blistering feces	10.7668	2.38802	1.72568	4.55839	2.09475	7.23626	2.19698	0.893221	2.21889	1.92717
		floor-rise farming	10.6263	2.38802	1.53394	4.60959	2.09475	7.11857	2.19698	0.723541	2.27088	1.92717
		manual dry cleaning manure	10.8258	2.38802	1.89307	4.44994	2.09475	6.05066	2.19698	0.719059	1.35409	1.78054
		mechanical dry clearing manure	10.7668	2.38802	1.72568	4.55839	2.09475	6.97193	2.19698	0.723541	2.27088	1.78054
		Water flushing feces	10.7668	2.38802	1.72568	4.55839	2.09475	7.08147	2.19698	0.714577	2.24274	1.92717
	layer
		bedding / litter	0.110102	0.0529412	0.00427283	0.0395049	0.0133829	0.0682098	0.0465882	0.00143785	0.00813906	0.0120446
		Blistering feces	0.111713	0.0529412	0.00443006	0.0409587	0.0133829	0.0728888	0.0465882	0.00239642	0.0121272	0.011777
		floor-rise farming	0.11136	0.0529412	0.00393783	0.041098	0.0133829	0.0724502	0.0465882	0.00191714	0.0121679	0.011777
		manual dry cleaning manure	0.110442	0.0529412	0.00474758	0.0393706	0.0133829	0.0706495	0.045	0.00185178	0.0117531	0.0120446
		mechanical dry clearing manure	0.107617	0.0529412	0.00443006	0.0368628	0.0133829	0.0740364	0.045	0.00143338	0.0162275	0.0113755
		Water flushing feces	0.111713	0.0529412	0.00443006	0.0409587	0.0133829	0.0724502	0.0465882	0.00191714	0.0121679	0.011777
	pig
		bedding / litter	2.10102	0.755985	0.617716	0.695016	0.0323071	1.33454	0.680387	0.258082	0.367	0.0290764
		Blistering feces	2.13023	0.755985	0.63146	0.71048	0.0323071	1.391	0.680387	0.322602	0.358935	0.0290764
		floor-rise farming	2.07761	0.755985	0.561298	0.72802	0.0323071	1.34786	0.680387	0.263579	0.374817	0.0290764
		manual dry cleaning manure	2.1525	0.755985	0.686351	0.677857	0.0323071	1.19632	0.680387	0.263579	0.22489	0.027461
		mechanical dry clearing manure	2.13023	0.755985	0.63146	0.71048	0.0323071	1.34786	0.680387	0.263579	0.374817	0.0290764
		Water flushing feces	2.13023	0.755985	0.63146	0.71048	0.0323071	1.33454	0.680387	0.258082	0.367	0.0290764
Xinjiang
	beef cattle
		bedding / litter	8.95089	1.81312	1.54948	4.09294	1.49536	5.61749	1.66807	0.647175	2.0312	1.27105
		Blistering feces	9.0115	1.81312	1.56612	4.1369	1.49536	5.86236	1.66807	0.808969	2.0096	1.37573
		floor-rise farming	8.88394	1.81312	1.39211	4.18336	1.49536	5.75033	1.66807	0.653981	2.05256	1.37573
		manual dry cleaning manure	9.07708	1.81312	1.72164	4.04697	1.49536	4.56041	1.66807	0.813222	0.808065	1.27105
		mechanical dry clearing manure	9.0115	1.81312	1.56612	4.1369	1.49536	5.64566	1.66807	0.653981	2.05256	1.27105
		Water flushing feces	9.0115	1.81312	1.56612	4.1369	1.49536	5.72217	1.66807	0.647175	2.0312	1.37573
	broiler
		bedding / litter	0.0186622	0.00841726	0.00150115	0.00642644	0.0023173	0.0109059	0.00715467	0.00045323	0.00121239	0.00208557
		Blistering feces	0.0189222	0.00841726	0.00155039	0.00663724	0.0023173	0.0116742	0.00715467	0.000755383	0.00179448	0.00196971
		floor-rise farming	0.0187958	0.00841726	0.00137813	0.00668307	0.0023173	0.0116094	0.00715467	0.000622908	0.00186214	0.00196971
		manual dry cleaning manure	0.0187846	0.00841726	0.00166795	0.00638208	0.0023173	0.0111046	0.00715467	0.000622908	0.00124143	0.00208557
		mechanical dry clearing manure	0.0182585	0.00841726	0.00155039	0.00597352	0.0023173	0.0122301	0.00715467	0.000622908	0.00248285	0.00196971
		Water flushing feces	0.0189222	0.00841726	0.00155039	0.00663724	0.0023173	0.0115352	0.00715467	0.000604306	0.00180653	0.00196971
	dairy cattle
		bedding / litter	19.6773	4.3969	3.13703	8.28645	3.85693	12.7687	4.04515	1.3157	4.12941	3.27839
		Blistering feces	19.8243	4.3969	3.17739	8.39307	3.85693	13.3237	4.04515	1.64463	4.0855	3.54838
		floor-rise farming	19.5655	4.3969	2.82435	8.48733	3.85693	13.1069	4.04515	1.33221	4.18121	3.54838
		manual dry cleaning manure	19.9328	4.3969	3.48559	8.19338	3.85693	11.1407	4.04515	1.32396	2.49319	3.27839
		mechanical dry clearing manure	19.8243	4.3969	3.17739	8.39307	3.85693	12.837	4.04515	1.33221	4.18121	3.27839
		Water flushing feces	19.8243	4.3969	3.17739	8.39307	3.85693	13.0386	4.04515	1.3157	4.12941	3.54838
	layer
		bedding / litter	0.157883	0.0759162	0.00612712	0.056649	0.0191907	0.097811	0.0668063	0.00206184	0.0116712	0.0172716
		Blistering feces	0.160193	0.0759162	0.00635259	0.0587336	0.0191907	0.104521	0.0668063	0.0034364	0.0173901	0.0168878
		floor-rise farming	0.159687	0.0759162	0.00564675	0.0589334	0.0191907	0.103892	0.0668063	0.00274912	0.0174484	0.0168878
		manual dry cleaning manure	0.158371	0.0759162	0.00680791	0.0564563	0.0191907	0.101309	0.0645288	0.0026554	0.0168536	0.0172716
		mechanical dry clearing manure	0.15432	0.0759162	0.00635259	0.0528603	0.0191907	0.106166	0.0645288	0.00205543	0.0232699	0.0163121
		Water flushing feces	0.160193	0.0759162	0.00635259	0.0587336	0.0191907	0.103892	0.0668063	0.00274912	0.0174484	0.0168878
	pig
		bedding / litter	2.19789	0.79084	0.646196	0.727059	0.0337966	1.39607	0.711756	0.26998	0.38392	0.0304169
		Blistering feces	2.22845	0.79084	0.660573	0.743236	0.0337966	1.45513	0.711756	0.337475	0.375483	0.0304169
		floor-rise farming	2.1734	0.79084	0.587176	0.761585	0.0337966	1.41	0.711756	0.275731	0.392098	0.0304169
		manual dry cleaning manure	2.25174	0.79084	0.717996	0.709109	0.0337966	1.25147	0.711756	0.275731	0.235259	0.0287271
		mechanical dry clearing manure	2.22845	0.79084	0.660573	0.743236	0.0337966	1.41	0.711756	0.275731	0.392098	0.0304169
		Water flushing feces	2.22845	0.79084	0.660573	0.743236	0.0337966	1.39607	0.711756	0.26998	0.38392	0.0304169
Yunnan
	beef cattle
		bedding / litter	12.3227	2.49612	2.13317	5.63475	2.05866	7.73362	2.29643	0.890967	2.79635	1.74986
		Blistering feces	12.4061	2.49612	2.15608	5.69528	2.05866	8.07073	2.29643	1.11371	2.76662	1.89397
		floor-rise farming	12.2305	2.49612	1.91652	5.75925	2.05866	7.9165	2.29643	0.900337	2.82576	1.89397
		manual dry cleaning manure	12.4964	2.49612	2.37019	5.57147	2.05866	6.27833	2.29643	1.11957	1.11247	1.74986
		mechanical dry clearing manure	12.4061	2.49612	2.15608	5.69528	2.05866	7.77239	2.29643	0.900337	2.82576	1.74986
		Water flushing feces	12.4061	2.49612	2.15608	5.69528	2.05866	7.87772	2.29643	0.890967	2.79635	1.89397
	broiler
		bedding / litter	0.027219	0.0122767	0.00218945	0.00937304	0.00337981	0.0159063	0.0104352	0.00066104	0.00176829	0.00304183
		Blistering feces	0.0275982	0.0122767	0.00226127	0.0096805	0.00337981	0.017027	0.0104352	0.00110173	0.00261726	0.00287284
		floor-rise farming	0.0274138	0.0122767	0.00201001	0.00974733	0.00337981	0.0169325	0.0104352	0.000908519	0.00271595	0.00287284
		manual dry cleaning manure	0.0273975	0.0122767	0.00243272	0.00930833	0.00337981	0.0161962	0.0104352	0.000908519	0.00181064	0.00304183
		mechanical dry clearing manure	0.0266302	0.0122767	0.00226127	0.00871245	0.00337981	0.0178378	0.0104352	0.000908519	0.00362127	0.00287284
		Water flushing feces	0.0275982	0.0122767	0.00226127	0.0096805	0.00337981	0.0168242	0.0104352	0.000881387	0.00263485	0.00287284
	dairy cattle
		bedding / litter	10.687	2.38802	1.70376	4.50048	2.09475	6.93484	2.19698	0.714577	2.24274	1.78054
		Blistering feces	10.7668	2.38802	1.72568	4.55839	2.09475	7.23626	2.19698	0.893221	2.21889	1.92717
		floor-rise farming	10.6263	2.38802	1.53394	4.60959	2.09475	7.11857	2.19698	0.723541	2.27088	1.92717
		manual dry cleaning manure	10.8258	2.38802	1.89307	4.44994	2.09475	6.05066	2.19698	0.719059	1.35409	1.78054
		mechanical dry clearing manure	10.7668	2.38802	1.72568	4.55839	2.09475	6.97193	2.19698	0.723541	2.27088	1.78054
		Water flushing feces	10.7668	2.38802	1.72568	4.55839	2.09475	7.08147	2.19698	0.714577	2.24274	1.92717
	layer
		bedding / litter	0.110102	0.0529412	0.00427283	0.0395049	0.0133829	0.0682098	0.0465882	0.00143785	0.00813906	0.0120446
		Blistering feces	0.111713	0.0529412	0.00443006	0.0409587	0.0133829	0.0728888	0.0465882	0.00239642	0.0121272	0.011777
		floor-rise farming	0.11136	0.0529412	0.00393783	0.041098	0.0133829	0.0724502	0.0465882	0.00191714	0.0121679	0.011777
		manual dry cleaning manure	0.110442	0.0529412	0.00474758	0.0393706	0.0133829	0.0706495	0.045	0.00185178	0.0117531	0.0120446
		mechanical dry clearing manure	0.107617	0.0529412	0.00443006	0.0368628	0.0133829	0.0740364	0.045	0.00143338	0.0162275	0.0113755
		Water flushing feces	0.111713	0.0529412	0.00443006	0.0409587	0.0133829	0.0724502	0.0465882	0.00191714	0.0121679	0.011777
	pig
		bedding / litter	2.10102	0.755985	0.617716	0.695016	0.0323071	1.33454	0.680387	0.258082	0.367	0.0290764
		Blistering feces	2.13023	0.755985	0.63146	0.71048	0.0323071	1.391	0.680387	0.322602	0.358935	0.0290764
		floor-rise farming	2.07761	0.755985	0.561298	0.72802	0.0323071	1.34786	0.680387	0.263579	0.374817	0.0290764
		manual dry cleaning manure	2.1525	0.755985	0.686351	0.677857	0.0323071	1.19632	0.680387	0.263579	0.22489	0.027461
		mechanical dry clearing manure	2.13023	0.755985	0.63146	0.71048	0.0323071	1.34786	0.680387	0.263579	0.374817	0.0290764
		Water flushing feces	2.13023	0.755985	0.63146	0.71048	0.0323071	1.33454	0.680387	0.258082	0.367	0.0290764
Zhejiang
	beef cattle
		bedding / litter	10.9061	2.20917	1.88794	4.98699	1.822	6.84457	2.03244	0.788543	2.47489	1.5487
		Blistering feces	10.98	2.20917	1.90822	5.04056	1.822	7.14293	2.03244	0.985679	2.44857	1.67624
		floor-rise farming	10.8245	2.20917	1.6962	5.09717	1.822	7.00643	2.03244	0.796835	2.50091	1.67624
		manual dry cleaning manure	11.0599	2.20917	2.09771	4.93098	1.822	5.55658	2.03244	0.990861	0.984578	1.5487
		mechanical dry clearing manure	10.98	2.20917	1.90822	5.04056	1.822	6.87889	2.03244	0.796835	2.50091	1.5487
		Water flushing feces	10.98	2.20917	1.90822	5.04056	1.822	6.97211	2.03244	0.788543	2.47489	1.67624
	broiler
		bedding / litter	0.0237709	0.0107215	0.00191209	0.00818566	0.00295166	0.0138913	0.00911324	0.0005773	0.00154428	0.00265649
		Blistering feces	0.0241021	0.0107215	0.00197481	0.00845417	0.00295166	0.01487	0.00911324	0.000962166	0.00228571	0.00250891
		floor-rise farming	0.023941	0.0107215	0.00175539	0.00851254	0.00295166	0.0147875	0.00911324	0.000793428	0.0023719	0.00250891
		manual dry cleaning manure	0.0239268	0.0107215	0.00212454	0.00812915	0.00295166	0.0141444	0.00911324	0.000793428	0.00158126	0.00265649
		mechanical dry clearing manure	0.0232567	0.0107215	0.00197481	0.00760875	0.00295166	0.0155781	0.00911324	0.000793428	0.00316253	0.00250891
		Water flushing feces	0.0241021	0.0107215	0.00197481	0.00845417	0.00295166	0.0146929	0.00911324	0.000769733	0.00230106	0.00250891
	dairy cattle
		bedding / litter	18.4839	4.13023	2.94676	7.78387	3.62301	11.9942	3.79981	1.23591	3.87896	3.07956
		Blistering feces	18.6219	4.13023	2.98468	7.88402	3.62301	12.5156	3.79981	1.54488	3.83771	3.33317
		floor-rise farming	18.3789	4.13023	2.65305	7.97257	3.62301	12.312	3.79981	1.25141	3.92762	3.33317
		manual dry cleaning manure	18.7239	4.13023	3.27418	7.69645	3.62301	10.465	3.79981	1.24366	2.34198	3.07956
		mechanical dry clearing manure	18.6219	4.13023	2.98468	7.88402	3.62301	12.0584	3.79981	1.25141	3.92762	3.07956
		Water flushing feces	18.6219	4.13023	2.98468	7.88402	3.62301	12.2478	3.79981	1.23591	3.87896	3.33317
	layer
		bedding / litter	0.122286	0.0587996	0.00474566	0.0438765	0.0148638	0.0757578	0.0517437	0.00159696	0.00903973	0.0133775
		Blistering feces	0.124075	0.0587996	0.00492029	0.0454911	0.0148638	0.0809547	0.0517437	0.00266161	0.0134692	0.0130802
		floor-rise farming	0.123683	0.0587996	0.00437359	0.0456459	0.0148638	0.0804676	0.0517437	0.00212929	0.0135144	0.0130802
		manual dry cleaning manure	0.122664	0.0587996	0.00527295	0.0437273	0.0148638	0.0784675	0.0499797	0.0020567	0.0130537	0.0133775
		mechanical dry clearing manure	0.119526	0.0587996	0.00492029	0.040942	0.0148638	0.0822293	0.0499797	0.001592	0.0180233	0.0126343
		Water flushing feces	0.124075	0.0587996	0.00492029	0.0454911	0.0148638	0.0804676	0.0517437	0.00212929	0.0135144	0.0130802
	pig
		bedding / litter	1.56881	0.564486	0.461242	0.51896	0.0241233	0.996489	0.508037	0.192707	0.274035	0.021711
		Blistering feces	1.59062	0.564486	0.471504	0.530507	0.0241233	1.03864	0.508037	0.240883	0.268012	0.021711
		floor-rise farming	1.55133	0.564486	0.419115	0.543604	0.0241233	1.00643	0.508037	0.196812	0.279872	0.021711
		manual dry cleaning manure	1.60725	0.564486	0.512491	0.506148	0.0241233	0.893277	0.508037	0.196812	0.167923	0.0205048
		mechanical dry clearing manure	1.59062	0.564486	0.471504	0.530507	0.0241233	1.00643	0.508037	0.196812	0.279872	0.021711
		Water flushing feces	1.59062	0.564486	0.471504	0.530507	0.0241233	0.996489	0.508037	0.192707	0.274035	0.021711

## Sheet: other animal
Other animal NH3 EFs by stage under current and abated scenario
		Four Stage	Indoor/Housing	Storage	Application	Outdoor/Grazing	Four Stage	Indoor/Housing	Storage	Application	Outdoor/Grazing
region	animal type	total NH3 EF_current	EF_1_current	EF_2_current	EF_3_current	EF_4_current	total NH3 EF _abated scenario	EF_1_abated scenario	EF_2_abated scenario	EF_3_abated scenario	EF_4_abated scenario
Anhui
	ass	13.6893	1.93148	4.15269	2.77637	4.82871	7.50859	1.35204	3.11452	1.11055	1.93148
	horse	13.6893	1.93148	4.15269	2.77637	4.82871	7.50859	1.35204	3.11452	1.11055	1.93148
	laying duck	0.298775	0.208522	0.0151035	0.0751499	0	0.140362	0.104261	0.0060414	0.0300599	0
	laying goose	0.214108	0.149431	0.0108235	0.0538539	0	0.100586	0.0747155	0.00432939	0.0215416	0
	meat duck	0.0264507	0.0179912	0.00256676	0.00589274	0	0.0123794	0.0089956	0.00102671	0.0023571	0
	meat goose	0.0317409	0.0221526	0.00160455	0.00798366	0	0.0149116	0.0110763	0.000641818	0.00319347	0
	mule	13.6893	1.93148	4.15269	2.77637	4.82871	7.50859	1.35204	3.11452	1.11055	1.93148
	rabbit	0.193869	0.108664	0.0130396	0.0560748	0.0160906	0.103497	0.0651982	0.00782379	0.0224299	0.00804529
	Sheep/goat	2.55667	0.467275	0.856679	0.926251	0.30647	1.51248	0.327093	0.599675	0.463125	0.122588
Beijing
	ass	14.5443	2.05213	4.41207	2.94979	5.13032	7.97758	1.43649	3.30905	1.17991	2.05213
	horse	14.5443	2.05213	4.41207	2.94979	5.13032	7.97758	1.43649	3.30905	1.17991	2.05213
	laying duck	0.3019	0.210703	0.0152615	0.0759358	0	0.14183	0.105351	0.00610459	0.0303743	0
	laying goose	0.216348	0.150994	0.0109367	0.0544172	0	0.101638	0.0754969	0.00437467	0.0217669	0
	meat duck	0.0267274	0.0181794	0.00259361	0.00595437	0	0.0125089	0.00908969	0.00103744	0.00238175	0
	meat goose	0.0320728	0.0223843	0.00162133	0.00806716	0	0.0150676	0.0111922	0.000648531	0.00322687	0
	mule	14.5443	2.05213	4.41207	2.94979	5.13032	7.97758	1.43649	3.30905	1.17991	2.05213
	rabbit	0.195896	0.1098	0.013176	0.0566613	0.0162589	0.10458	0.0658801	0.00790562	0.0226645	0.00812944
	Sheep/goat	2.14	0.391121	0.717061	0.775295	0.256523	1.26598	0.273785	0.501943	0.387647	0.102609
Chongqing
	ass	15.1441	2.13676	4.59403	3.07144	5.34189	8.30658	1.49573	3.44552	1.22857	2.13676
	horse	15.1441	2.13676	4.59403	3.07144	5.34189	8.30658	1.49573	3.44552	1.22857	2.13676
	laying duck	0.304092	0.212233	0.0153723	0.0764872	0	0.14286	0.106116	0.00614892	0.0305949	0
	laying goose	0.217919	0.15209	0.0110161	0.0548123	0	0.102376	0.0760451	0.00440644	0.0219249	0
	meat duck	0.0269214	0.0183114	0.00261244	0.00599761	0	0.0125997	0.00915569	0.00104498	0.00239904	0
	meat goose	0.0323057	0.0225469	0.0016331	0.00812574	0	0.015177	0.0112734	0.00065324	0.0032503	0
	mule	15.1441	2.13676	4.59403	3.07144	5.34189	8.30658	1.49573	3.44552	1.22857	2.13676
	rabbit	0.197319	0.110597	0.0132717	0.0570727	0.0163769	0.105339	0.0663585	0.00796302	0.0228291	0.00818847
	Sheep/goat	2.60217	0.475591	0.871924	0.942734	0.311924	1.5394	0.332913	0.610347	0.471367	0.124769
Fujian
	ass	13.8041	1.94769	4.18753	2.79967	4.86922	7.57159	1.36338	3.14065	1.11987	1.94769
	horse	13.8041	1.94769	4.18753	2.79967	4.86922	7.57159	1.36338	3.14065	1.11987	1.94769
	laying duck	0.299195	0.208815	0.0151247	0.0752554	0	0.140559	0.104407	0.00604989	0.0301022	0
	laying goose	0.214409	0.149641	0.0108387	0.0539296	0	0.100728	0.0748205	0.00433547	0.0215718	0
	meat duck	0.0264879	0.0180165	0.00257037	0.00590102	0	0.0123968	0.00900824	0.00102815	0.00236041	0
	meat goose	0.0317854	0.0221838	0.0016068	0.00799488	0	0.0149326	0.0110919	0.00064272	0.00319795	0
	mule	13.8041	1.94769	4.18753	2.79967	4.86922	7.57159	1.36338	3.14065	1.11987	1.94769
	rabbit	0.194141	0.108816	0.013058	0.0561536	0.0161132	0.103643	0.0652898	0.00783478	0.0224614	0.0080566
	Sheep/goat	2.56027	0.467932	0.857882	0.927552	0.3069	1.51461	0.327552	0.600517	0.463776	0.12276
Gansu
	ass	11.6729	1.64698	3.54101	2.36742	4.11746	6.4026	1.15289	2.65576	0.946968	1.64698
	horse	11.6729	1.64698	3.54101	2.36742	4.11746	6.4026	1.15289	2.65576	0.946968	1.64698
	laying duck	0.291406	0.203379	0.014731	0.0732963	0	0.1369	0.101689	0.0058924	0.0293185	0
	laying goose	0.208828	0.145745	0.0105565	0.0525256	0	0.0981055	0.0728727	0.00422261	0.0210103	0
	meat duck	0.0257983	0.0175475	0.00250346	0.0057474	0	0.0120741	0.00877373	0.00100138	0.00229896	0
	meat goose	0.030958	0.0216063	0.00156497	0.00778675	0	0.0145438	0.0108031	0.000625988	0.0031147	0
	mule	11.6729	1.64698	3.54101	2.36742	4.11746	6.4026	1.15289	2.65576	0.946968	1.64698
	rabbit	0.189087	0.105984	0.012718	0.0546918	0.0156937	0.100945	0.0635902	0.00763082	0.0218767	0.00784686
	Sheep/goat	2.49362	0.45575	0.835549	0.903405	0.298911	1.47518	0.319025	0.584884	0.451703	0.119564
Guangdong
	ass	13.2809	1.87386	4.02881	2.69355	4.68466	7.28459	1.3117	3.02161	1.07742	1.87386
	horse	13.2809	1.87386	4.02881	2.69355	4.68466	7.28459	1.3117	3.02161	1.07742	1.87386
	laying duck	0.297283	0.20748	0.0150281	0.0747745	0	0.139661	0.10374	0.00601123	0.0299098	0
	laying goose	0.213039	0.148685	0.0107694	0.0535849	0	0.100084	0.0743423	0.00430777	0.021434	0
	meat duck	0.0263186	0.0179013	0.00255394	0.0058633	0	0.0123176	0.00895067	0.00102158	0.00234532	0
	meat goose	0.0315823	0.022042	0.00159653	0.00794378	0	0.0148371	0.011021	0.000638612	0.00317751	0
	mule	13.2809	1.87386	4.02881	2.69355	4.68466	7.28459	1.3117	3.02161	1.07742	1.87386
	rabbit	0.1929	0.108121	0.0129745	0.0557947	0.0160102	0.10298	0.0648725	0.00778471	0.0223179	0.00800511
	Sheep/goat	2.5439	0.464941	0.852399	0.921624	0.304939	1.50493	0.325459	0.596679	0.460812	0.121976
Guangxi
	ass	14.9016	2.10254	4.52047	3.02226	5.25636	8.17358	1.47178	3.39035	1.2089	2.10254
	horse	14.9016	2.10254	4.52047	3.02226	5.25636	8.17358	1.47178	3.39035	1.2089	2.10254
	laying duck	0.303206	0.211614	0.0153275	0.0762643	0	0.142444	0.105807	0.006131	0.0305057	0
	laying goose	0.217284	0.151647	0.010984	0.0546525	0	0.102078	0.0758235	0.0043936	0.021861	0
	meat duck	0.026843	0.018258	0.00260483	0.00598013	0	0.012563	0.00912901	0.00104193	0.00239205	0
	meat goose	0.0322116	0.0224812	0.00162834	0.00810206	0	0.0151327	0.0112406	0.000651336	0.00324082	0
	mule	14.9016	2.10254	4.52047	3.02226	5.25636	8.17358	1.47178	3.39035	1.2089	2.10254
	rabbit	0.196744	0.110275	0.013233	0.0569064	0.0163292	0.105032	0.0661651	0.00793981	0.0227626	0.00816461
	Sheep/goat	2.59459	0.474205	0.869383	0.939987	0.311015	1.53491	0.331943	0.608568	0.469993	0.124406
Guizhou
	ass	14.9782	2.11335	4.5437	3.03779	5.28337	8.21558	1.47934	3.40777	1.21512	2.11335
	horse	14.9782	2.11335	4.5437	3.03779	5.28337	8.21558	1.47934	3.40777	1.21512	2.11335
	laying duck	0.303486	0.21181	0.0153416	0.0763347	0	0.142575	0.105905	0.00613666	0.0305339	0
	laying goose	0.217484	0.151787	0.0109941	0.054703	0	0.102172	0.0758935	0.00439765	0.0218812	0
	meat duck	0.0268677	0.0182749	0.00260723	0.00598565	0	0.0125746	0.00913743	0.00104289	0.00239426	0
	meat goose	0.0322413	0.0225019	0.00162984	0.00810954	0	0.0151467	0.011251	0.000651937	0.00324381	0
	mule	14.9782	2.11335	4.5437	3.03779	5.28337	8.21558	1.47934	3.40777	1.21512	2.11335
	rabbit	0.196925	0.110377	0.0132452	0.0569589	0.0163443	0.105129	0.0662262	0.00794714	0.0227836	0.00817214
	Sheep/goat	2.59698	0.474642	0.870185	0.940854	0.311302	1.53633	0.33225	0.60913	0.470427	0.124521
Hainan
	ass	16.4458	2.32042	4.98891	3.33544	5.80105	9.02057	1.6243	3.74168	1.33418	2.32042
	horse	16.4458	2.32042	4.98891	3.33544	5.80105	9.02057	1.6243	3.74168	1.33418	2.32042
	laying duck	0.308849	0.215553	0.0156128	0.0776838	0	0.145095	0.107776	0.00624511	0.0310735	0
	laying goose	0.221328	0.15447	0.0111884	0.0556698	0	0.103978	0.0772348	0.00447537	0.0222679	0
	meat duck	0.0273426	0.0185978	0.00265331	0.00609143	0	0.0127968	0.00929892	0.00106132	0.00243657	0
	meat goose	0.0328111	0.0228996	0.00165865	0.00825286	0	0.0154144	0.0114498	0.000663459	0.00330114	0
	mule	16.4458	2.32042	4.98891	3.33544	5.80105	9.02057	1.6243	3.74168	1.33418	2.32042
	rabbit	0.200406	0.112328	0.0134793	0.0579656	0.0166331	0.106987	0.0673966	0.00808759	0.0231862	0.00831657
	Sheep/goat	2.64288	0.483031	0.885564	0.957482	0.316803	1.56348	0.338122	0.619895	0.478741	0.126721
Hebei
	ass	14.3656	2.02692	4.35787	2.91355	5.06729	7.87959	1.41884	3.26841	1.16542	2.02692
	horse	14.3656	2.02692	4.35787	2.91355	5.06729	7.87959	1.41884	3.26841	1.16542	2.02692
	laying duck	0.301247	0.210247	0.0152285	0.0757716	0	0.141524	0.105124	0.00609139	0.0303086	0
	laying goose	0.21588	0.150667	0.010913	0.0542995	0	0.101419	0.0753336	0.00436521	0.0217198	0
	meat duck	0.0266696	0.0181401	0.002588	0.00594149	0	0.0124818	0.00907003	0.0010352	0.0023766	0
	meat goose	0.0320035	0.0223359	0.00161782	0.00804972	0	0.015035	0.011168	0.000647128	0.00321989	0
	mule	14.3656	2.02692	4.35787	2.91355	5.06729	7.87959	1.41884	3.26841	1.16542	2.02692
	rabbit	0.195473	0.109563	0.0131475	0.0565388	0.0162237	0.104354	0.0657376	0.00788852	0.0226155	0.00811186
	Sheep/goat	2.22	0.405742	0.743867	0.804278	0.266112	1.31331	0.28402	0.520707	0.402139	0.106445
Heilongjiang
	ass	14.3018	2.01791	4.33852	2.90061	5.04479	7.84459	1.41254	3.25389	1.16024	2.01791
	horse	14.3018	2.01791	4.33852	2.90061	5.04479	7.84459	1.41254	3.25389	1.16024	2.01791
	laying duck	0.301014	0.210084	0.0152167	0.0757129	0	0.141414	0.105042	0.00608667	0.0302852	0
	laying goose	0.215713	0.150551	0.0109046	0.0542574	0	0.10134	0.0752753	0.00436183	0.021703	0
	meat duck	0.0266489	0.018126	0.002586	0.00593689	0	0.0124722	0.00906301	0.0010344	0.00237476	0
	meat goose	0.0319787	0.0223186	0.00161657	0.00804348	0	0.0150233	0.0111593	0.000646627	0.00321739	0
	mule	14.3018	2.01791	4.33852	2.90061	5.04479	7.84459	1.41254	3.25389	1.16024	2.01791
	rabbit	0.195321	0.109478	0.0131374	0.056495	0.0162112	0.104273	0.0656868	0.00788241	0.022598	0.00810558
	Sheep/goat	2.57583	0.470776	0.863098	0.933191	0.308766	1.52381	0.329543	0.604168	0.466596	0.123506
Henan
	ass	14.4805	2.04312	4.39272	2.93684	5.10781	7.94259	1.43019	3.29454	1.17474	2.04312
	horse	14.4805	2.04312	4.39272	2.93684	5.10781	7.94259	1.43019	3.29454	1.17474	2.04312
	laying duck	0.301667	0.21054	0.0152497	0.0758772	0	0.141721	0.10527	0.00609988	0.0303509	0
	laying goose	0.216181	0.150877	0.0109282	0.0543751	0	0.10156	0.0754386	0.00437129	0.02175	0
	meat duck	0.0267067	0.0181653	0.00259161	0.00594977	0	0.0124992	0.00908267	0.00103664	0.00237991	0
	meat goose	0.0320481	0.022367	0.00162007	0.00806093	0	0.0150559	0.0111835	0.00064803	0.00322437	0
	mule	14.4805	2.04312	4.39272	2.93684	5.10781	7.94259	1.43019	3.29454	1.17474	2.04312
	rabbit	0.195745	0.109715	0.0131658	0.0566175	0.0162463	0.104499	0.0658292	0.00789951	0.022647	0.00812316
	Sheep/goat	2.8	0.511747	0.938211	1.0144	0.335637	1.65643	0.358223	0.656748	0.507202	0.134255
Hubei
	ass	12.0813	1.7046	3.6649	2.45025	4.26151	6.6266	1.19322	2.74867	0.980098	1.7046
	horse	12.0813	1.7046	3.6649	2.45025	4.26151	6.6266	1.19322	2.74867	0.980098	1.7046
	laying duck	0.292899	0.20442	0.0148064	0.0736717	0	0.137601	0.10221	0.00592258	0.0294687	0
	laying goose	0.209897	0.146492	0.0106106	0.0527946	0	0.098608	0.0732459	0.00424424	0.0211179	0
	meat duck	0.0259305	0.0176373	0.00251628	0.00577683	0	0.0121359	0.00881867	0.00100651	0.00231073	0
	meat goose	0.0311165	0.0217169	0.00157299	0.00782663	0	0.0146183	0.0108585	0.000629194	0.00313065	0
	mule	12.0813	1.7046	3.6649	2.45025	4.26151	6.6266	1.19322	2.74867	0.980098	1.7046
	rabbit	0.190056	0.106526	0.0127832	0.0549719	0.0157741	0.101462	0.0639158	0.0076699	0.0219888	0.00788705
	Sheep/goat	2.50639	0.458084	0.839828	0.908032	0.300442	1.48273	0.320659	0.58788	0.454016	0.120177
Hunan
	ass	12.2599	1.72981	3.7191	2.48648	4.32453	6.7246	1.21087	2.78932	0.994593	1.72981
	horse	12.2599	1.72981	3.7191	2.48648	4.32453	6.7246	1.21087	2.78932	0.994593	1.72981
	laying duck	0.293552	0.204876	0.0148394	0.073836	0	0.137908	0.102438	0.00593578	0.0295344	0
	laying goose	0.210365	0.146818	0.0106342	0.0529123	0	0.0988278	0.0734092	0.0042537	0.0211649	0
	meat duck	0.0259883	0.0176767	0.00252189	0.00578971	0	0.012163	0.00883833	0.00100876	0.00231589	0
	meat goose	0.0311859	0.0217653	0.00157649	0.00784408	0	0.0146509	0.0108827	0.000630597	0.00313763	0
	mule	12.2599	1.72981	3.7191	2.48648	4.32453	6.7246	1.21087	2.78932	0.994593	1.72981
	rabbit	0.190479	0.106764	0.0128117	0.0550944	0.0158093	0.101688	0.0640583	0.007687	0.0220378	0.00790463
	Sheep/goat	2.51197	0.459105	0.841701	0.910057	0.301112	1.48604	0.321374	0.58919	0.455028	0.120445
Inner Mongolia
	ass	13.3957	1.89007	4.06365	2.71684	4.72517	7.34759	1.32305	3.04774	1.08674	1.89007
	horse	13.3957	1.89007	4.06365	2.71684	4.72517	7.34759	1.32305	3.04774	1.08674	1.89007
	laying duck	0.297703	0.207773	0.0150493	0.07488	0	0.139858	0.103887	0.00601971	0.029952	0
	laying goose	0.21334	0.148894	0.0107846	0.0536605	0	0.100225	0.0744472	0.00431385	0.0214642	0
	meat duck	0.0263557	0.0179266	0.00255755	0.00587158	0	0.012335	0.00896331	0.00102302	0.00234863	0
	meat goose	0.0316269	0.0220731	0.00159878	0.007955	0	0.0148581	0.0110366	0.000639514	0.003182	0
	mule	13.3957	1.89007	4.06365	2.71684	4.72517	7.34759	1.32305	3.04774	1.08674	1.89007
	rabbit	0.193173	0.108274	0.0129928	0.0558735	0.0160328	0.103126	0.0649641	0.0077957	0.0223494	0.00801641
	Sheep/goat	2.54749	0.465597	0.853603	0.922925	0.305369	1.50705	0.325918	0.597522	0.461463	0.122148
Jiangsu
	ass	13.4851	1.90267	4.09075	2.73496	4.75668	7.39659	1.33187	3.06806	1.09398	1.90267
	horse	13.4851	1.90267	4.09075	2.73496	4.75668	7.39659	1.33187	3.06806	1.09398	1.90267
	laying duck	0.298029	0.208001	0.0150658	0.0749622	0	0.140012	0.104001	0.00602632	0.0299849	0
	laying goose	0.213574	0.149058	0.0107964	0.0537194	0	0.100335	0.0745289	0.00431858	0.0214878	0
	meat duck	0.0263846	0.0179463	0.00256035	0.00587802	0	0.0123485	0.00897314	0.00102414	0.00235121	0
	meat goose	0.0316616	0.0220973	0.00160054	0.00796372	0	0.0148744	0.0110487	0.000640215	0.00318549	0
	mule	13.4851	1.90267	4.09075	2.73496	4.75668	7.39659	1.33187	3.06806	1.09398	1.90267
	rabbit	0.193385	0.108392	0.0130071	0.0559348	0.0160504	0.103239	0.0650354	0.00780425	0.0223739	0.0080252
	Sheep/goat	2.55029	0.466108	0.854539	0.923937	0.305704	1.5087	0.326276	0.598177	0.461969	0.122282
Jiangxi
	ass	13.97	1.9711	4.23786	2.83331	4.92775	7.66259	1.37977	3.1784	1.13333	1.9711
	horse	13.97	1.9711	4.23786	2.83331	4.92775	7.66259	1.37977	3.1784	1.13333	1.9711
	laying duck	0.299801	0.209238	0.0151554	0.0754079	0	0.140844	0.104619	0.00606215	0.0301632	0
	laying goose	0.214844	0.149944	0.0108607	0.0540389	0	0.100932	0.0749721	0.00434426	0.0216155	0
	meat duck	0.0265416	0.018053	0.00257558	0.00591298	0	0.0124219	0.0090265	0.00103023	0.00236519	0
	meat goose	0.0318499	0.0222287	0.00161006	0.00801108	0	0.0149628	0.0111144	0.000644022	0.00320443	0
	mule	13.97	1.9711	4.23786	2.83331	4.92775	7.66259	1.37977	3.1784	1.13333	1.9711
	rabbit	0.194535	0.109037	0.0130844	0.0562674	0.0161458	0.103853	0.0654221	0.00785066	0.022507	0.00807292
	Sheep/goat	2.56545	0.46888	0.859621	0.929432	0.307522	1.51768	0.328216	0.601734	0.464716	0.123009
Jilin
	ass	15.2973	2.15836	4.64048	3.10249	5.39591	8.39058	1.51086	3.48036	1.241	2.15836
	horse	15.2973	2.15836	4.64048	3.10249	5.39591	8.39058	1.51086	3.48036	1.241	2.15836
	laying duck	0.304652	0.212623	0.0154006	0.076628	0	0.143123	0.106312	0.00616023	0.0306512	0
	laying goose	0.21832	0.15237	0.0110364	0.0549132	0	0.102565	0.0761851	0.00441455	0.0219653	0
	meat duck	0.026971	0.0183451	0.00261725	0.00600864	0	0.0126229	0.00917254	0.0010469	0.00240346	0
	meat goose	0.0323652	0.0225884	0.00163611	0.00814069	0	0.0152049	0.0112942	0.000654442	0.00325628	0
	mule	15.2973	2.15836	4.64048	3.10249	5.39591	8.39058	1.51086	3.48036	1.241	2.15836
	rabbit	0.197682	0.110801	0.0132961	0.0571778	0.0164071	0.105533	0.0664806	0.00797767	0.0228711	0.00820354
	Sheep/goat	2.60696	0.476466	0.873529	0.944469	0.312498	1.54223	0.333526	0.61147	0.472235	0.124999
Liaoning
	ass	14.8123	2.08994	4.49337	3.00414	5.22485	8.12458	1.46296	3.37003	1.20166	2.08994
	horse	14.8123	2.08994	4.49337	3.00414	5.22485	8.12458	1.46296	3.37003	1.20166	2.08994
	laying duck	0.30288	0.211386	0.015311	0.0761822	0	0.14229	0.105693	0.0061244	0.0304729	0
	laying goose	0.21705	0.151484	0.0109722	0.0545937	0	0.101968	0.0757419	0.00438887	0.0218375	0
	meat duck	0.0268141	0.0182384	0.00260202	0.00597369	0	0.0125495	0.00911918	0.00104081	0.00238948	0
	meat goose	0.0321769	0.022457	0.00162659	0.00809334	0	0.0151164	0.0112285	0.000650635	0.00323733	0
	mule	14.8123	2.08994	4.49337	3.00414	5.22485	8.12458	1.46296	3.37003	1.20166	2.08994
	rabbit	0.196532	0.110156	0.0132188	0.0568451	0.0163116	0.104919	0.0660939	0.00793126	0.0227381	0.00815581
	Sheep/goat	2.5918	0.473694	0.868447	0.938975	0.31068	1.53326	0.331586	0.607913	0.469487	0.124272
Ningxia
	ass	14.506	2.04672	4.40046	2.94202	5.11681	7.95658	1.43271	3.30034	1.17681	2.04672
	horse	14.506	2.04672	4.40046	2.94202	5.11681	7.95658	1.43271	3.30034	1.17681	2.04672
	laying duck	0.30176	0.210605	0.0152544	0.0759006	0	0.141765	0.105303	0.00610176	0.0303603	0
	laying goose	0.216247	0.150924	0.0109316	0.0543919	0	0.101591	0.0754619	0.00437265	0.0217568	0
	meat duck	0.026715	0.018171	0.00259241	0.00595161	0	0.0125031	0.00908548	0.00103696	0.00238064	0
	meat goose	0.032058	0.022374	0.00162058	0.00806342	0	0.0150606	0.011187	0.00064823	0.00322537	0
	mule	14.506	2.04672	4.40046	2.94202	5.11681	7.95658	1.43271	3.30034	1.17681	2.04672
	rabbit	0.195806	0.109749	0.0131699	0.056635	0.0162513	0.104531	0.0658496	0.00790195	0.022654	0.00812567
	Sheep/goat	2.58222	0.471943	0.865237	0.935505	0.309532	1.52759	0.33036	0.605666	0.467752	0.123813
Qinghai
	ass	14.506	2.04672	4.40046	2.94202	5.11681	7.95658	1.43271	3.30034	1.17681	2.04672
	horse	14.506	2.04672	4.40046	2.94202	5.11681	7.95658	1.43271	3.30034	1.17681	2.04672
	laying duck	0.30176	0.210605	0.0152544	0.0759006	0	0.141765	0.105303	0.00610176	0.0303603	0
	laying goose	0.216247	0.150924	0.0109316	0.0543919	0	0.101591	0.0754619	0.00437265	0.0217568	0
	meat duck	0.026715	0.018171	0.00259241	0.00595161	0	0.0125031	0.00908548	0.00103696	0.00238064	0
	meat goose	0.032058	0.022374	0.00162058	0.00806342	0	0.0150606	0.011187	0.00064823	0.00322537	0
	mule	14.506	2.04672	4.40046	2.94202	5.11681	7.95658	1.43271	3.30034	1.17681	2.04672
	rabbit	0.195806	0.109749	0.0131699	0.056635	0.0162513	0.104531	0.0658496	0.00790195	0.022654	0.00812567
	Sheep/goat	2.58222	0.471943	0.865237	0.935505	0.309532	1.52759	0.33036	0.605666	0.467752	0.123813
Shaanxi
	ass	14.238	2.00891	4.31916	2.88767	5.02228	7.80959	1.40624	3.23937	1.15507	2.00891
	horse	14.238	2.00891	4.31916	2.88767	5.02228	7.80959	1.40624	3.23937	1.15507	2.00891
	laying duck	0.300781	0.209922	0.0152049	0.0756543	0	0.141304	0.104961	0.00608196	0.0302617	0
	laying goose	0.215546	0.150434	0.0108961	0.0542154	0	0.101262	0.075217	0.00435845	0.0216862	0
	meat duck	0.0266283	0.018112	0.00258399	0.00593229	0	0.0124625	0.00905599	0.0010336	0.00237292	0
	meat goose	0.0319539	0.0223013	0.00161532	0.00803725	0	0.0150117	0.0111507	0.000646126	0.0032149	0
	mule	14.238	2.00891	4.31916	2.88767	5.02228	7.80959	1.40624	3.23937	1.15507	2.00891
	rabbit	0.19517	0.109393	0.0131272	0.0564512	0.0161986	0.104192	0.0656359	0.0078763	0.0225805	0.0080993
	Sheep/goat	2.57384	0.470412	0.862429	0.932468	0.308527	1.52263	0.329288	0.6037	0.466234	0.123411
Shandong
	ass	14.3018	2.01791	4.33852	2.90061	5.04479	7.84459	1.41254	3.25389	1.16024	2.01791
	horse	14.3018	2.01791	4.33852	2.90061	5.04479	7.84459	1.41254	3.25389	1.16024	2.01791
	laying duck	0.301014	0.210084	0.0152167	0.0757129	0	0.141414	0.105042	0.00608667	0.0302852	0
	laying goose	0.215713	0.150551	0.0109046	0.0542574	0	0.10134	0.0752753	0.00436183	0.021703	0
	meat duck	0.0266489	0.018126	0.002586	0.00593689	0	0.0124722	0.00906301	0.0010344	0.00237476	0
	meat goose	0.0319787	0.0223186	0.00161657	0.00804348	0	0.0150233	0.0111593	0.000646627	0.00321739	0
	mule	14.3018	2.01791	4.33852	2.90061	5.04479	7.84459	1.41254	3.25389	1.16024	2.01791
	rabbit	0.195321	0.109478	0.0131374	0.056495	0.0162112	0.104273	0.0656868	0.00788241	0.022598	0.00810558
	Sheep/goat	2.57583	0.470776	0.863098	0.933191	0.308766	1.52381	0.329543	0.604168	0.466596	0.123506
Shanghai
	ass	13.0129	1.83605	3.94751	2.63919	4.59013	7.13759	1.28524	2.96063	1.05568	1.83605
	horse	13.0129	1.83605	3.94751	2.63919	4.59013	7.13759	1.28524	2.96063	1.05568	1.83605
	laying duck	0.296303	0.206797	0.0149786	0.0745281	0	0.139201	0.103398	0.00599142	0.0298112	0
	laying goose	0.212337	0.148195	0.0107339	0.0534083	0	0.0997542	0.0740973	0.00429357	0.0213633	0
	meat duck	0.0262319	0.0178424	0.00254553	0.00584399	0	0.012277	0.00892118	0.00101821	0.00233759	0
	meat goose	0.0314782	0.0219694	0.00159127	0.00791761	0	0.0147882	0.0109847	0.000636508	0.00316704	0
	mule	13.0129	1.83605	3.94751	2.63919	4.59013	7.13759	1.28524	2.96063	1.05568	1.83605
	rabbit	0.192265	0.107765	0.0129318	0.0556109	0.0159575	0.102641	0.0646588	0.00775906	0.0222444	0.00797873
	Sheep/goat	2.53552	0.463409	0.849591	0.918587	0.303934	1.49997	0.324386	0.594714	0.459294	0.121574
Shanxi
	ass	14.0849	1.9873	4.2727	2.85661	4.96826	7.72559	1.39111	3.20453	1.14264	1.9873
	horse	14.0849	1.9873	4.2727	2.85661	4.96826	7.72559	1.39111	3.20453	1.14264	1.9873
	laying duck	0.300221	0.209531	0.0151766	0.0755135	0	0.141042	0.104765	0.00607064	0.0302054	0
	laying goose	0.215144	0.150154	0.0108759	0.0541145	0	0.101073	0.075077	0.00435034	0.0216458	0
	meat duck	0.0265787	0.0180783	0.00257919	0.00592126	0	0.0124393	0.00903914	0.00103167	0.0023685	0
	meat goose	0.0318945	0.0222598	0.00161231	0.0080223	0	0.0149838	0.0111299	0.000644924	0.00320892	0
	mule	14.0849	1.9873	4.2727	2.85661	4.96826	7.72559	1.39111	3.20453	1.14264	1.9873
	rabbit	0.194807	0.10919	0.0131027	0.0563462	0.0161685	0.103998	0.0655137	0.00786165	0.0225385	0.00808423
	Sheep/goat	2.56905	0.469536	0.860824	0.930733	0.307953	1.5198	0.328675	0.602577	0.465367	0.123181
Sichuan
	ass	14.0721	1.9855	4.26883	2.85402	4.96376	7.71859	1.38985	3.20162	1.14161	1.9855
	horse	14.0721	1.9855	4.26883	2.85402	4.96376	7.71859	1.38985	3.20162	1.14161	1.9855
	laying duck	0.300174	0.209498	0.0151742	0.0755018	0	0.14102	0.104749	0.0060697	0.0302007	0
	laying goose	0.215111	0.150131	0.0108742	0.0541061	0	0.101057	0.0750654	0.00434967	0.0216424	0
	meat duck	0.0265746	0.0180755	0.00257879	0.00592034	0	0.0124374	0.00903773	0.00103151	0.00236813	0
	meat goose	0.0318895	0.0222564	0.00161206	0.00802105	0	0.0149814	0.0111282	0.000644824	0.00320842	0
	mule	14.0721	1.9855	4.26883	2.85402	4.96376	7.71859	1.38985	3.20162	1.14161	1.9855
	rabbit	0.194777	0.109173	0.0131007	0.0563374	0.0161659	0.103982	0.0655036	0.00786043	0.022535	0.00808297
	Sheep/goat	2.56865	0.469463	0.86069	0.930589	0.307905	1.51956	0.328624	0.602483	0.465294	0.123162
Tianjin
	ass	14.9016	2.10254	4.52047	3.02226	5.25636	8.17358	1.47178	3.39035	1.2089	2.10254
	horse	14.9016	2.10254	4.52047	3.02226	5.25636	8.17358	1.47178	3.39035	1.2089	2.10254
	laying duck	0.303206	0.211614	0.0153275	0.0762643	0	0.142444	0.105807	0.006131	0.0305057	0
	laying goose	0.217284	0.151647	0.010984	0.0546525	0	0.102078	0.0758235	0.0043936	0.021861	0
	meat duck	0.026843	0.018258	0.00260483	0.00598013	0	0.012563	0.00912901	0.00104193	0.00239205	0
	meat goose	0.0322116	0.0224812	0.00162834	0.00810206	0	0.0151327	0.0112406	0.000651336	0.00324082	0
	mule	14.9016	2.10254	4.52047	3.02226	5.25636	8.17358	1.47178	3.39035	1.2089	2.10254
	rabbit	0.196744	0.110275	0.013233	0.0569064	0.0163292	0.105032	0.0661651	0.00793981	0.0227626	0.00816461
	Sheep/goat	2.73	0.498953	0.914756	0.989045	0.327246	1.61502	0.349267	0.640329	0.494522	0.130899
Tibet
	ass	14.1487	1.99631	4.29206	2.86955	4.99077	7.76059	1.39741	3.21905	1.14782	1.99631
	horse	14.1487	1.99631	4.29206	2.86955	4.99077	7.76059	1.39741	3.21905	1.14782	1.99631
	laying duck	0.300454	0.209694	0.0151884	0.0755722	0	0.141151	0.104847	0.00607536	0.0302289	0
	laying goose	0.215312	0.150271	0.0108843	0.0541565	0	0.101152	0.0751354	0.00435372	0.0216626	0
	meat duck	0.0265994	0.0180923	0.00258119	0.00592586	0	0.012449	0.00904616	0.00103248	0.00237034	0
	meat goose	0.0319192	0.0222771	0.00161356	0.00802853	0	0.0149954	0.0111386	0.000645425	0.00321141	0
	mule	14.1487	1.99631	4.29206	2.86955	4.99077	7.76059	1.39741	3.21905	1.14782	1.99631
	rabbit	0.194958	0.109274	0.0131129	0.05639	0.016181	0.104079	0.0655646	0.00786776	0.022556	0.00809051
	Sheep/goat	2.57104	0.469901	0.861493	0.931456	0.308192	1.52098	0.328931	0.603045	0.465728	0.123277
Xinjiang
	ass	15.5014	2.18717	4.70243	3.14391	5.46794	8.50258	1.53102	3.52682	1.25756	2.18717
	horse	15.5014	2.18717	4.70243	3.14391	5.46794	8.50258	1.53102	3.52682	1.25756	2.18717
	laying duck	0.305398	0.213144	0.0154383	0.0768157	0	0.143474	0.106572	0.00617532	0.0307263	0
	laying goose	0.218854	0.152743	0.0110634	0.0550477	0	0.102816	0.0763717	0.00442536	0.0220191	0
	meat duck	0.027037	0.01839	0.00262366	0.00602336	0	0.0126538	0.00919501	0.00104946	0.00240934	0
	meat goose	0.0324444	0.0226437	0.00164011	0.00816063	0	0.0152421	0.0113218	0.000656045	0.00326425	0
	mule	15.5014	2.18717	4.70243	3.14391	5.46794	8.50258	1.53102	3.52682	1.25756	2.18717
	rabbit	0.198166	0.111072	0.0133287	0.0573178	0.0164473	0.105791	0.0666435	0.00799722	0.0229271	0.00822363
	Sheep/goat	2.61335	0.477633	0.875668	0.946783	0.313263	1.54601	0.334343	0.612968	0.473391	0.125305
Yunnan
	ass	13.8296	1.95129	4.19528	2.80484	4.87823	7.58559	1.3659	3.14646	1.12194	1.95129
	horse	13.8296	1.95129	4.19528	2.80484	4.87823	7.58559	1.3659	3.14646	1.12194	1.95129
	laying duck	0.299288	0.20888	0.0151294	0.0752789	0	0.140603	0.10444	0.00605178	0.0301116	0
	laying goose	0.214476	0.149688	0.0108421	0.0539464	0	0.100759	0.0748438	0.00433683	0.0215786	0
	meat duck	0.0264961	0.0180221	0.00257117	0.00590286	0	0.0124007	0.00901105	0.00102847	0.00236114	0
	meat goose	0.0317954	0.0221907	0.0016073	0.00799737	0	0.0149372	0.0110953	0.00064292	0.00319895	0
	mule	13.8296	1.95129	4.19528	2.80484	4.87823	7.58559	1.3659	3.14646	1.12194	1.95129
	rabbit	0.194202	0.10885	0.013062	0.0561711	0.0161182	0.103675	0.0653102	0.00783722	0.0224684	0.00805911
	Sheep/goat	2.56106	0.468077	0.85815	0.927841	0.306996	1.51508	0.327654	0.600705	0.463921	0.122798
Zhejiang
	ass	13.4595	1.89907	4.08301	2.72978	4.74768	7.38259	1.32935	3.06225	1.09191	1.89907
	horse	13.4595	1.89907	4.08301	2.72978	4.74768	7.38259	1.32935	3.06225	1.09191	1.89907
	laying duck	0.297936	0.207936	0.0150611	0.0749387	0	0.139968	0.103968	0.00602443	0.0299755	0
	laying goose	0.213507	0.149011	0.0107931	0.0537026	0	0.100304	0.0745055	0.00431723	0.021481	0
	meat duck	0.0263764	0.0179407	0.00255955	0.00587618	0	0.0123446	0.00897033	0.00102382	0.00235047	0
	meat goose	0.0316517	0.0220904	0.00160004	0.00796123	0	0.0148697	0.0110452	0.000640015	0.00318449	0
	mule	13.4595	1.89907	4.08301	2.72978	4.74768	7.38259	1.32935	3.06225	1.09191	1.89907
	rabbit	0.193324	0.108358	0.013003	0.0559173	0.0160454	0.103206	0.065015	0.0078018	0.0223669	0.00802269
	Sheep/goat	2.54949	0.465962	0.854271	0.923648	0.305609	1.50823	0.326173	0.59799	0.461824	0.122243
